# Supplementary material
Source: publisher figshare collection journal article supplement (https://gsajournals.figshare.com/articles/dataset/_/16565973)
Supplement: Supplementary file 1 [file 1]

## Sheet: map2331
m207	5.617	1
m216	7.794	1
m210	7.89	1
m214	8.107	1
m215	8.163	1
m212	8.686	1
m217	11.669	1
m224	15.765	1
m226	16.625	1
m225	19.824	1
m201	23.823	1
m202	23.862	1
m196	24.029	1
m199	24.507	1
m194	24.541	1
m195	24.626	1
m193	24.802	1
m192	28.262	1
m191	28.307	1
m184	29.559	1
m182	29.565	1
m188	29.615	1
m187	29.771	1
m190	29.781	1
m180	29.922	1
m179	30.416	1
m175	32.059	1
m171	41.193	1
m170	45.783	1
m167	49.239	1
m161	52.132	1
m162	52.567	1
m158	52.572	1
m150	57.36	1
m157	58.968	1
m156	60.759	1
m138	67.561	1
m137	79.524	1
m139	80.355	1
m142	83.289	1
m141	83.762	1
m588	0.233	2
m589	0.349	2
m590	1.654	2
m592	1.663	2
m594	1.784	2
m591	1.804	2
m595	2.391	2
m596	3.268	2
m601	3.651	2
m600	4.357	2
m599	4.418	2
m598	4.54	2
m597	5.589	2
m609	5.621	2
m604	5.664	2
m605	5.992	2
m607	6.096	2
m610	6.116	2
m602	6.161	2
m615	6.426	2
m612	6.431	2
m611	6.809	2
m616	7.61	2
m631	7.734	2
m635	7.911	2
m628	8.532	2
m617	8.613	2
m623	9.014	2
m630	9.29	2
m618	9.511	2
m629	9.556	2
m626	9.638	2
m627	9.743	2
m621	10.08	2
m624	10.182	2
m625	10.209	2
m638	10.349	2
m639	10.622	2
m637	10.769	2
m644	11.122	2
m643	11.186	2
m641	11.612	2
m645	11.825	2
m642	12.177	2
m646	12.204	2
m649	12.228	2
m658	12.653	2
m654	12.761	2
m651	12.982	2
m652	12.988	2
m656	13.025	2
m657	13.297	2
m663	13.428	2
m666	13.519	2
m655	13.701	2
m661	13.958	2
m664	13.994	2
m668	14.075	2
m667	14.082	2
m669	14.731	2
m671	15.212	2
m672	15.675	2
m678	15.697	2
m677	15.856	2
m675	16.027	2
m676	16.059	2
m688	16.909	2
m683	16.975	2
m681	17.655	2
m686	17.69	2
m684	17.719	2
m680	17.723	2
m691	17.763	2
m692	18.194	2
m693	18.365	2
m694	18.379	2
m695	18.448	2
m699	18.787	2
m697	18.863	2
m700	19.111	2
m706	19.181	2
m701	19.289	2
m698	19.313	2
m696	19.501	2
m710	19.948	2
m714	19.98	2
m708	20.004	2
m712	20.01	2
m709	20.017	2
m711	20.035	2
m718	20.55	2
m716	20.586	2
m715	20.698	2
m717	20.778	2
m719	20.792	2
m721	21.431	2
m726	22.506	2
m723	22.513	2
m727	22.746	2
m728	22.823	2
m729	24.277	2
m505	37.377	3
m508	38.645	3
m521	51.339	3
m518	52.4	3
m517	52.697	3
m519	53.047	3
m520	53.079	3
m523	54.699	3
m522	57.165	3
m528	57.195	3
m530	59.313	3
m524	59.373	3
m529	59.377	3
m526	59.954	3
m534	60.822	3
m533	61.271	3
m536	62.801	3
m535	62.82	3
m539	64.064	3
m537	64.09	3
m538	64.702	3
m542	65.667	3
m550	65.853	3
m546	65.905	3
m553	66.275	3
m541	66.303	3
m547	67.029	3
m552	69.8	3
m554	71.273	3
m555	72.768	3
m559	73.469	3
m558	73.567	3
m557	74.777	3
m562	77.534	3
m563	77.566	3
m560	77.593	3
m564	77.775	3
m565	78.337	3
m566	78.584	3
m571	78.781	3
m568	78.834	3
m570	80.419	3
m569	80.495	3
m574	81.19	3
m580	82.795	3
m579	83.278	3
m576	83.46	3
m573	83.517	3
m585	83.939	3
m586	84.228	3
m584	84.281	3
m582	84.92	3
m845	31.142	4
m846	31.147	4
m843	36.882	4
m842	46.22	4
m841	48.174	4
m840	48.412	4
m837	49.446	4
m839	51.503	4
m835	53.133	4
m838	55.102	4
m834	55.252	4
m836	55.302	4
m832	56.438	4
m831	56.794	4
m828	58.466	4
m820	59.496	4
m823	59.925	4
m824	59.974	4
m822	60.274	4
m821	60.406	4
m817	60.945	4
m816	61.051	4
m818	61.073	4
m815	61.342	4
m810	63.566	4
m814	65.263	4
m812	68.556	4
m813	68.628	4
m805	0.867	5
m803	1.241	5
m804	1.768	5
m806	2.137	5
m808	2.451	5
m797	2.657	5
m798	2.735	5
m800	2.817	5
m799	2.833	5
m796	4.997	5
m794	5.156	5
m790	5.57	5
m793	5.836	5
m795	6.177	5
m791	6.817	5
m786	7.112	5
m787	7.911	5
m783	8.576	5
m785	8.753	5
m788	8.911	5
m782	10.822	5
m780	11.316	5
m781	11.629	5
m779	12.016	5
m778	15.799	5
m774	15.998	5
m776	16.449	5
m773	16.453	5
m777	17.067	5
m770	18.844	5
m771	19.32	5
m769	19.706	5
m768	20.868	5
m767	21.166	5
m764	21.81	5
m763	22.466	5
m765	22.677	5
m766	23.026	5
m762	23.449	5
m747	34.888	5
m753	34.891	5
m749	35.374	5
m745	35.833	5
m750	36.212	5
m742	36.85	5
m738	37.179	5
m744	37.284	5
m740	37.621	5
m743	37.641	5
m737	37.931	5
m736	38.637	5
m735	39.073	5
m732	39.322	5
m733	41.55	5
m1039	21.485	6
m1038	21.547	6
m1036	22.847	6
m1030	23.506	6
m1032	23.63	6
m1035	23.743	6
m1027	23.803	6
m1029	23.944	6
m1026	25.45	6
m1025	25.868	6
m1020	26.244	6
m1021	26.804	6
m1019	29.045	6
m1023	29.252	6
m937	30.041	6
m1018	30.206	6
m1014	30.971	6
m1012	31.032	6
m1017	31.139	6
m1006	31.42	6
m1007	31.667	6
m1009	32.057	6
m994	32.25	6
m1005	32.333	6
m997	32.993	6
m1001	33.572	6
m1002	33.659	6
m998	33.746	6
m1004	33.833	6
m995	33.846	6
m993	33.964	6
m992	34.441	6
m988	37.817	6
m989	37.96	6
m986	40.405	6
m987	41.18	6
m985	41.93	6
m990	43.252	6
m976	43.468	6
m982	43.481	6
m980	43.485	6
m978	43.628	6
m977	43.707	6
m984	43.925	6
m983	44.136	6
m971	44.796	6
m970	45.073	6
m972	45.258	6
m969	46.392	6
m968	46.529	6
m959	46.717	6
m965	46.925	6
m956	47.036	6
m957	47.132	6
m967	47.324	6
m964	47.335	6
m958	47.462	6
m963	47.582	6
m961	47.612	6
m951	47.835	6
m953	48.064	6
m948	48.391	6
m950	48.541	6
m949	48.61	6
m945	48.64	6
m942	48.869	6
m944	49.037	6
m939	51.085	6
m938	51.763	6
m929	54.187	6
m934	55.026	6
m936	55.036	6
m933	55.116	6
m940	55.456	6
m935	55.523	6
m932	56.054	6
m930	57.142	6
m927	58.162	6
m135	1.089	7
m134	2.269	7
m130	3.003	7
m128	3.333	7
m124	3.678	7
m129	3.774	7
m114	4.186	7
m122	5	7
m123	5.464	7
m127	6.084	7
m118	6.125	7
m121	6.285	7
m112	6.584	7
m120	6.595	7
m113	8.067	7
m116	8.242	7
m110	8.417	7
m115	8.538	7
m117	8.858	7
m109	8.889	7
m111	10.349	7
m107	13.235	7
m97	14.801	7
m96	15.482	7
m95	17.771	7
m81	18.526	7
m83	19.376	7
m86	19.42	7
m84	19.655	7
m85	20.37	7
m88	20.532	7
m82	21.147	7
m93	21.455	7
m89	21.758	7
m94	22.008	7
m80	24.092	7
m74	24.25	7
m75	26.084	7
m73	26.269	7
m77	26.282	7
m79	26.402	7
m78	27.776	7
m70	29.223	7
m71	29.481	7
m69	29.687	7
m67	29.759	7
m72	30.091	7
m66	30.788	7
m64	35.062	7
m63	37.923	7
m58	38.955	7
m61	39.027	7
m56	39.037	7
m57	39.793	7
m59	40.41	7
m60	40.874	7
m50	42.38	7
m49	42.603	7
m48	44.142	7
m46	44.689	7
m45	45.738	7
m42	45.781	7
m41	45.938	7
m44	46.011	7
m39	46.655	7
m37	46.963	7
m33	48.565	7
m34	48.827	7
m30	49.082	7
m13	50.307	7
m29	50.943	7
m17	52.943	7
m23	55.085	7
m27	55.826	7
m25	55.985	7
m20	55.994	7
m22	56.094	7
m14	56.662	7
m15	56.686	7
m10	58.33	7
m9	59.4	7
m4	59.515	7
m8	59.619	7
m2	59.951	7
m12	60.282	7
m7	60.812	7
m403	1.055	8
m407	1.4	8
m404	2.418	8
m413	2.933	8
m414	2.943	8
m416	3.508	8
m415	4.361	8
m412	5.009	8
m409	5.013	8
m411	5.593	8
m408	5.67	8
m423	6.48	8
m419	6.495	8
m417	6.909	8
m422	7.073	8
m421	7.255	8
m426	9.531	8
m424	9.712	8
m429	10.775	8
m428	11.544	8
m430	17.008	8
m431	18.172	8
m432	18.473	8
m433	19.346	8
m434	20.248	8
m438	22.459	8
m437	22.58	8
m439	32.466	8
m440	34.303	8
m442	34.965	8
m444	35.296	8
m446	36.644	8
m447	36.72	8
m445	37.693	8
m443	37.732	8
m450	38.721	8
m456	41.064	8
m461	44.143	8
m458	44.173	8
m453	44.423	8
m449	44.519	8
m455	44.887	8
m460	45.191	8
m462	46.701	8
m464	46.739	8
m463	46.978	8
m468	48.779	8
m465	48.857	8
m466	49.328	8
m472	49.898	8
m470	50.425	8
m471	50.829	8
m478	51.196	8
m474	51.2	8
m475	51.37	8
m477	51.764	8
m480	52.139	8
m479	52.181	8
m484	53.2	8
m491	53.267	8
m493	53.433	8
m501	53.489	8
m487	54.271	8
m492	54.303	8
m488	54.338	8
m495	54.918	8
m485	54.958	8
m489	54.995	8
m482	55.108	8
m499	55.368	8
m497	58.171	8
m504	73.621	8
m400	0.403	9
m402	1.322	9
m397	1.617	9
m399	5.999	9
m398	7.562	9
m393	9.328	9
m387	9.932	9
m389	10.232	9
m381	11.384	9
m383	11.715	9
m380	11.982	9
m376	12.516	9
m372	13.596	9
m379	13.934	9
m370	14.064	9
m375	14.159	9
m368	14.75	9
m367	14.766	9
m358	14.919	9
m363	14.956	9
m353	15.539	9
m365	15.689	9
m356	15.72	9
m364	15.723	9
m359	15.777	9
m355	15.853	9
m360	15.881	9
m362	15.977	9
m357	16.034	9
m351	16.732	9
m350	17.791	9
m347	17.805	9
m348	17.955	9
m345	18.129	9
m346	18.882	9
m342	19.164	9
m336	19.229	9
m333	20.046	9
m335	20.156	9
m328	24.404	9
m317	24.476	9
m316	25.427	9
m313	25.445	9
m314	25.76	9
m310	26.976	9
m309	27.488	9
m306	30.068	9
m307	30.084	9
m305	30.949	9
m303	31.39	9
m302	31.557	9
m301	31.787	9
m299	32.233	9
m298	33.291	9
m295	33.791	9
m297	34.429	9
m292	35.191	9
m291	35.713	9
m288	36.371	9
m287	36.497	9
m290	36.882	9
m285	36.937	9
m284	37.363	9
m281	37.476	9
m282	37.478	9
m280	38.793	9
m278	40.702	9
m276	45.844	9
m275	45.878	9
m274	47.508	9
m273	47.682	9
m270	48.286	9
m271	48.892	9
m268	50.178	9
m264	51.907	9
m263	51.947	9
m262	52.032	9
m261	52.23	9
m248	52.584	9
m257	53.205	9
m247	54.013	9
m259	54.08	9
m256	54.481	9
m254	54.506	9
m258	54.645	9
m252	54.856	9
m249	55.315	9
m250	55.466	9
m253	55.783	9
m251	56.193	9
m241	57.767	9
m238	57.814	9
m227	58.151	9
m233	58.272	9
m235	58.312	9
m234	58.822	9
m232	58.906	9
m242	59.084	9
m237	59.137	9
m236	59.758	9
m229	60.098	9
m230	60.209	9
m228	60.536	9
m231	60.671	9
m926	6.785	10
m924	7.98	10
m925	8.195	10
m919	13.674	10
m914	14.607	10
m921	14.845	10
m909	15.445	10
m901	16.139	10
m895	17.382	10
m905	18.361	10
m890	19.65	10
m899	19.733	10
m911	21.332	10
m897	21.445	10
m885	22.47	10
m888	22.499	10
m889	22.677	10
m884	22.817	10
m879	23.483	10
m883	23.485	10
m882	24.414	10
m880	25.616	10
m881	26.689	10
m875	27.359	10
m872	28.236	10
m874	28.926	10
m869	29.503	10
m868	29.624	10
m867	31.715	10
m862	35.084	10
m863	35.166	10
m856	36.886	10
m858	37.936	10
m850	38.315	10
m847	38.511	10
m855	39.557	10
m851	39.559	10
m859	39.724	10
m853	40.012	10
m854	40.841	10

## Sheet: primary2331
sample	sire	dam	m2	m4	m7	m8	m9	m10	m12	m13	m14	m15	m17	m20	m22	m23	m25	m27	m29	m30	m33	m34	m37	m39	m41	m42	m44	m45	m46	m48	m49	m50	m56	m57	m58	m59	m60	m61	m63	m64	m66	m67	m69	m70	m71	m72	m73	m74	m75
1	-1	-1	ba	ab	ba	ba	ba	ba	aa	aa	ba	ab	ab	ab	ab	ba	ba	ab	ba	ab	ba	ba	ba	ab	ab	ab	ab	ab	ba	ba	ba	ba	aa	ba	aa	ba	ba	ab	ba	aa	ba	aa	aa	aa	aa	ba	aa	ba	ab
2	-1	-1	ba	ab	ba	ba	ba	ba	ab	ab	ba	ab	ab	ab	ab	ba	ba	ab	ba	ab	ba	ba	ba	ab	ab	ab	ab	ab	ba	ba	ba	ba	ab	ba	ab	ba	ba	ab	ba	ab	ba	ab	ab	ab	ab	ba	ab	ba	ab
3	1	2	aa	bb	aa	aa	aa	aa	ab	ab	aa	bb	bb	bb	bb	aa	aa	bb	aa	bb	aa	aa	aa	bb	bb	bb	ab	bb	aa	aa	aa	aa	aa	ab	aa	ab	ab	ab	ab	aa	ab	aa	aa	aa	aa	ab	aa	ab	ab
4	1	2	ab	ab	ab	ab	ab	ab	aa	aa	ab	ab	ab	ab	ab	ab	ab	ab	ab	ab	ab	ab	ab	ab	ab	ab	ab	ab	ab	ab	ab	ab	aa	ab	aa	ab	ab	ab	ab	aa	aa	ab	ab	ab	ab	aa	ab	aa	bb
5	1	2	aa	bb	aa	aa	aa	aa	ab	ab	aa	bb	bb	bb	bb	aa	aa	bb	aa	bb	aa	aa	aa	bb	bb	bb	bb	bb	aa	aa	aa	aa	ab	aa	ab	aa	aa	bb	ab	aa	ab	aa	aa	aa	aa	ab	aa	ab	ab
6	1	2	bb	aa	bb	bb	bb	bb	aa	aa	uu	aa	uu	aa	aa	bb	uu	aa	bb	aa	bb	bb	bb	aa	aa	aa	aa	aa	bb	uu	bb	bb	aa	bb	aa	bb	bb	aa	ab	ab	ab	ab	ab	ab	ab	ab	ab	ab	ab
7	1	2	ab	ab	ab	ab	uu	ab	ab	ab	ab	ab	ab	ab	ab	ab	ab	ab	ab	ab	ab	ab	ab	ab	ab	ab	ab	ab	ab	ab	ab	ab	ab	ab	ab	ab	ab	ab	ab	ab	ab	ab	ab	ab	ab	ab	ab	ab	ab
8	1	2	ab	ab	ab	ab	ab	ab	aa	aa	ab	ab	ab	ab	ab	ab	ab	ab	ab	ab	ab	ab	ab	ab	ab	ab	ab	ab	ab	ab	ab	ab	ab	aa	ab	aa	aa	bb	uu	ab	aa	ab	ab	ab	ab	aa	ab	aa	bb
9	1	2	aa	bb	aa	aa	aa	aa	ab	ab	aa	bb	bb	bb	bb	aa	aa	bb	aa	bb	aa	aa	aa	bb	bb	bb	bb	bb	aa	aa	aa	aa	ab	aa	ab	aa	aa	bb	aa	ab	aa	ab	ab	ab	ab	aa	ab	aa	bb
10	1	2	bb	aa	bb	bb	bb	bb	aa	aa	bb	aa	aa	aa	aa	bb	bb	aa	bb	aa	bb	bb	bb	aa	aa	aa	aa	aa	bb	bb	bb	bb	aa	bb	aa	bb	bb	aa	bb	aa	ab	ab	ab	ab	ab	ab	ab	ab	ab
11	1	2	ab	ab	ab	ab	ab	ab	aa	aa	ab	ab	ab	ab	ab	ab	ab	ab	ab	ab	ab	ab	ab	ab	ab	ab	ab	ab	ab	ab	ab	ab	aa	ab	aa	ab	ab	ab	ab	aa	aa	ab	ab	ab	ab	aa	ab	aa	uu
12	1	2	bb	aa	bb	bb	uu	bb	aa	aa	bb	aa	aa	aa	aa	uu	bb	aa	bb	uu	bb	bb	uu	aa	uu	aa	aa	aa	bb	bb	bb	bb	aa	uu	aa	bb	bb	aa	bb	aa	bb	aa	aa	aa	aa	bb	aa	bb	aa
13	1	2	ab	ab	ab	ab	ab	ab	aa	aa	ab	ab	ab	ab	ab	ab	ab	ab	ab	ab	ab	ab	ab	ab	ab	ab	ab	ab	ab	ab	ab	ab	aa	ab	aa	ab	ab	ab	ab	aa	ab	aa	aa	aa	aa	ab	aa	ab	ab
14	1	2	aa	bb	aa	aa	aa	aa	ab	ab	aa	bb	bb	bb	bb	aa	aa	ab	aa	bb	aa	aa	aa	uu	bb	bb	bb	bb	aa	aa	aa	aa	ab	uu	ab	aa	aa	bb	ab	aa	ab	aa	aa	aa	aa	ab	aa	ab	ab
15	1	2	bb	aa	bb	bb	uu	bb	aa	aa	uu	aa	aa	aa	aa	bb	bb	aa	bb	uu	bb	bb	bb	aa	aa	aa	aa	aa	bb	bb	bb	bb	aa	bb	aa	bb	bb	aa	bb	aa	bb	aa	aa	aa	aa	bb	aa	bb	aa
16	1	2	ab	ab	ab	ab	ab	ab	aa	aa	ab	ab	ab	ab	ab	ab	ab	ab	ab	ab	ab	ab	ab	ab	ab	ab	ab	ab	ab	ab	ab	ab	aa	ab	aa	ab	ab	ab	ab	aa	aa	ab	ab	ab	ab	aa	ab	aa	bb
17	1	2	aa	bb	aa	aa	aa	aa	ab	ab	aa	bb	bb	bb	bb	aa	aa	bb	aa	bb	aa	aa	aa	uu	bb	bb	bb	bb	aa	aa	aa	aa	ab	aa	ab	aa	aa	bb	aa	ab	aa	ab	ab	ab	ab	aa	ab	aa	bb
18	1	2	ab	ab	ab	ab	uu	ab	ab	ab	ab	ab	ab	ab	ab	ab	ab	ab	ab	ab	ab	ab	ab	ab	ab	ab	ab	ab	ab	ab	ab	ab	ab	ab	ab	ab	ab	ab	ab	ab	ab	ab	ab	ab	ab	ab	ab	ab	ab
19	1	2	bb	aa	bb	bb	bb	bb	aa	aa	bb	aa	aa	aa	aa	bb	bb	aa	bb	aa	bb	bb	bb	aa	aa	aa	aa	aa	uu	bb	bb	bb	aa	bb	aa	bb	bb	aa	bb	aa	bb	ab	ab	ab	ab	ab	ab	ab	ab
20	1	2	aa	bb	aa	aa	aa	aa	ab	ab	aa	bb	bb	bb	bb	aa	aa	bb	aa	bb	aa	aa	aa	bb	bb	bb	bb	bb	aa	aa	aa	aa	ab	aa	ab	aa	aa	bb	aa	ab	aa	ab	ab	ab	ab	aa	ab	aa	bb
21	1	2	ab	ab	ab	ab	ab	ab	aa	aa	ab	ab	ab	ab	ab	ab	ab	ab	ab	ab	ab	ab	ab	ab	ab	ab	ab	ab	bb	bb	bb	bb	aa	bb	aa	bb	bb	aa	bb	aa	ab	ab	ab	ab	ab	ab	ab	ab	ab
22	1	2	aa	bb	aa	aa	aa	aa	ab	ab	aa	bb	bb	bb	bb	aa	aa	bb	aa	bb	aa	aa	aa	bb	bb	bb	bb	bb	aa	aa	aa	aa	ab	aa	ab	aa	aa	bb	aa	ab	ab	aa	aa	aa	aa	ab	aa	ab	ab
23	1	2	ab	ab	ab	ab	ab	ab	ab	ab	uu	ab	ab	ab	ab	ab	ab	ab	ab	ab	ab	ab	uu	ab	ab	ab	ab	ab	ab	ab	ab	ab	ab	ab	ab	ab	ab	ab	ab	ab	ab	aa	aa	aa	aa	ab	aa	ab	ab
24	1	2	uu	bb	aa	aa	aa	aa	ab	ab	aa	bb	bb	bb	bb	aa	aa	bb	aa	bb	aa	aa	aa	bb	bb	bb	bb	bb	aa	aa	aa	aa	ab	aa	ab	aa	aa	bb	ab	aa	ab	aa	aa	aa	aa	ab	aa	ab	ab
25	1	2	ab	ab	ab	ab	ab	ab	ab	ab	ab	ab	ab	ab	ab	ab	ab	ab	ab	ab	ab	ab	ab	ab	ab	ab	ab	ab	ab	ab	ab	ab	ab	ab	ab	ab	ab	ab	bb	aa	bb	aa	aa	aa	aa	bb	aa	ab	aa
26	1	2	aa	bb	aa	aa	aa	aa	ab	ab	aa	ab	bb	bb	bb	uu	aa	uu	aa	bb	aa	aa	aa	bb	bb	bb	bb	bb	aa	aa	aa	aa	ab	aa	ab	aa	aa	bb	aa	ab	ab	aa	aa	aa	aa	ab	aa	uu	ab
27	1	2	ab	ab	ab	ab	ab	ab	aa	aa	ab	ab	aa	ab	ab	ab	ab	ab	ab	ab	ab	ab	ab	ab	ab	ab	ab	ab	ab	ab	ab	ab	aa	ab	aa	ab	ab	ab	aa	ab	aa	ab	ab	ab	ab	aa	ab	aa	bb
28	1	2	ab	ab	ab	ab	ab	ab	aa	aa	ab	ab	ab	ab	ab	ab	ab	ab	ab	ab	ab	ab	ab	ab	ab	ab	ab	ab	ab	ab	ab	ab	aa	ab	aa	ab	ab	ab	bb	aa	ab	aa	aa	aa	aa	ab	aa	ab	ab
29	1	2	ab	ab	ab	ab	ab	ab	ab	ab	ab	ab	uu	ab	ab	ab	ab	ab	ab	ab	ab	ab	ab	ab	ab	ab	ab	ab	ab	aa	ab	ab	ab	ab	ab	ab	ab	ab	ab	ab	ab	ab	ab	ab	ab	ab	ab	uu	ab
30	1	2	ab	ab	ab	ab	ab	ab	aa	aa	ab	ab	ab	ab	ab	ab	ab	ab	ab	ab	ab	ab	aa	bb	bb	bb	bb	bb	aa	aa	aa	aa	ab	aa	ab	aa	aa	bb	aa	ab	aa	ab	ab	ab	ab	aa	ab	aa	bb
31	1	2	ab	ab	ab	ab	ab	ab	aa	aa	ab	ab	ab	ab	ab	ab	ab	ab	ab	ab	ab	ab	ab	ab	ab	ab	ab	ab	ab	ab	ab	ab	aa	ab	aa	ab	ab	ab	ab	aa	ab	aa	aa	aa	aa	ab	aa	ab	ab
32	1	2	aa	bb	aa	aa	uu	aa	ab	ab	aa	bb	bb	bb	bb	aa	aa	bb	aa	bb	aa	aa	aa	bb	bb	bb	bb	bb	aa	aa	aa	aa	ab	aa	ab	aa	aa	bb	uu	ab	aa	ab	ab	ab	ab	aa	ab	aa	bb
33	1	2	aa	bb	aa	aa	aa	aa	ab	ab	aa	bb	bb	bb	bb	aa	aa	bb	aa	bb	aa	aa	aa	bb	bb	bb	bb	bb	aa	aa	aa	aa	ab	aa	ab	aa	aa	bb	aa	ab	aa	ab	ab	ab	ab	aa	ab	ab	ab
34	1	2	bb	aa	bb	bb	bb	ab	aa	aa	ab	ab	ab	ab	ab	ab	ab	ab	ab	ab	ab	ab	ab	ab	bb	bb	bb	bb	aa	aa	aa	aa	ab	aa	ab	aa	aa	bb	aa	ab	aa	ab	ab	ab	ab	aa	ab	aa	bb
35	1	2	aa	bb	aa	aa	aa	aa	ab	ab	aa	bb	bb	bb	bb	aa	aa	bb	aa	bb	aa	aa	aa	bb	bb	bb	ab	bb	aa	aa	aa	aa	ab	aa	ab	aa	aa	bb	aa	ab	ab	aa	aa	aa	aa	ab	aa	ab	ab
36	1	2	bb	uu	bb	bb	bb	bb	aa	aa	bb	aa	uu	aa	aa	bb	bb	aa	bb	aa	bb	bb	bb	uu	aa	aa	aa	uu	bb	bb	bb	bb	aa	uu	aa	uu	bb	uu	bb	aa	bb	aa	aa	aa	ab	ab	ab	ab	ab
37	1	2	ab	ab	ab	ab	ab	ab	ab	ab	ab	ab	ab	ab	ab	ab	ab	ab	aa	bb	aa	aa	aa	bb	bb	bb	bb	bb	aa	aa	aa	aa	ab	aa	ab	aa	aa	bb	aa	ab	aa	ab	ab	ab	ab	aa	ab	aa	bb
38	1	2	ab	ab	ab	ab	ab	ab	aa	aa	ab	ab	ab	ab	ab	ab	ab	ab	ab	ab	ab	ab	ab	ab	ab	ab	ab	ab	ab	ab	ab	ab	aa	ab	aa	ab	ab	ab	ab	ab	aa	ab	ab	ab	ab	aa	ab	aa	bb
39	1	2	aa	bb	aa	aa	uu	aa	ab	ab	aa	bb	bb	bb	bb	uu	aa	bb	aa	bb	ab	ab	ab	ab	ab	ab	ab	ab	ab	ab	ab	ab	aa	ab	aa	ab	ab	ab	ab	aa	ab	aa	aa	aa	aa	ab	aa	ab	ab
40	1	2	aa	bb	aa	aa	aa	aa	ab	ab	aa	bb	bb	bb	uu	aa	aa	bb	aa	bb	aa	aa	aa	bb	bb	bb	bb	bb	aa	aa	aa	aa	aa	ab	aa	ab	ab	ab	ab	aa	ab	aa	aa	aa	aa	ab	aa	ab	ab
41	1	2	ab	ab	ab	ab	ab	ab	ab	ab	ab	ab	ab	ab	ab	ab	ab	ab	ab	ab	ab	ab	ab	ab	ab	ab	ab	ab	ab	ab	ab	ab	ab	ab	ab	ab	ab	ab	ab	ab	ab	ab	ab	ab	ab	ab	ab	ab	ab
42	1	2	ab	ab	ab	ab	ab	ab	ab	ab	ab	ab	ab	ab	ab	ab	ab	ab	ab	ab	ab	ab	ab	ab	ab	ab	ab	ab	ab	ab	ab	ab	ab	ab	ab	ab	ab	ab	ab	ab	ab	ab	ab	ab	ab	ab	ab	ab	ab
43	1	2	bb	aa	bb	bb	bb	bb	aa	aa	bb	aa	aa	aa	aa	bb	bb	aa	bb	aa	bb	bb	bb	aa	aa	aa	aa	aa	bb	bb	bb	bb	aa	bb	aa	bb	bb	aa	bb	aa	bb	aa	aa	aa	aa	bb	aa	bb	aa
44	1	2	aa	bb	aa	aa	aa	aa	ab	ab	aa	bb	bb	bb	bb	aa	aa	bb	aa	bb	aa	aa	uu	bb	bb	ab	bb	bb	aa	aa	aa	aa	ab	aa	ab	aa	aa	bb	uu	ab	aa	ab	ab	ab	ab	aa	ab	aa	bb
45	1	2	bb	aa	bb	bb	bb	bb	aa	aa	bb	aa	uu	aa	aa	uu	bb	aa	ab	ab	ab	ab	ab	ab	ab	ab	ab	ab	ab	ab	ab	ab	aa	ab	aa	ab	ab	ab	ab	aa	ab	aa	aa	aa	aa	ab	aa	aa	bb
46	1	2	ab	ab	ab	ab	ab	ab	aa	aa	ab	ab	ab	ab	ab	ab	ab	ab	ab	ab	ab	ab	ab	ab	ab	ab	ab	ab	ab	ab	ab	ab	aa	ab	aa	ab	ab	ab	aa	ab	aa	ab	ab	ab	ab	aa	ab	aa	bb
47	1	2	aa	bb	aa	aa	aa	aa	ab	ab	aa	bb	bb	bb	bb	aa	aa	bb	aa	bb	aa	aa	uu	bb	bb	bb	bb	bb	aa	aa	aa	aa	ab	aa	ab	aa	aa	bb	aa	ab	aa	ab	ab	ab	ab	aa	ab	aa	uu
48	1	2	ab	ab	ab	ab	ab	ab	ab	ab	ab	ab	ab	ab	ab	ab	ab	ab	ab	ab	ab	ab	ab	ab	ab	ab	ab	ab	ab	ab	ab	ab	ab	ab	ab	ab	ab	ab	ab	ab	ab	ab	ab	ab	ab	ab	ab	ab	ab
49	1	2	ab	ab	ab	ab	ab	ab	aa	aa	ab	ab	ab	ab	ab	ab	ab	ab	ab	ab	ab	ab	ab	ab	ab	ab	ab	ab	ab	ab	ab	ab	aa	ab	aa	ab	ab	ab	ab	aa	aa	ab	ab	ab	ab	aa	ab	aa	bb
50	1	2	uu	aa	bb	bb	bb	bb	aa	aa	bb	aa	aa	aa	aa	bb	bb	aa	bb	uu	bb	bb	bb	uu	aa	aa	aa	aa	bb	bb	uu	bb	aa	bb	aa	bb	bb	aa	ab	ab	ab	ab	ab	ab	ab	ab	ab	ab	ab
51	1	2	aa	bb	aa	uu	aa	aa	ab	ab	aa	bb	bb	bb	uu	aa	aa	ab	aa	bb	aa	aa	aa	uu	bb	bb	bb	bb	aa	aa	uu	aa	ab	aa	ab	aa	aa	bb	uu	ab	ab	aa	aa	aa	aa	ab	aa	ab	ab
52	1	2	aa	bb	aa	aa	aa	aa	ab	ab	aa	bb	bb	bb	bb	aa	aa	bb	aa	bb	aa	aa	aa	bb	bb	bb	bb	bb	aa	aa	aa	aa	ab	uu	ab	aa	aa	uu	aa	ab	aa	ab	ab	ab	ab	aa	ab	aa	bb
53	1	2	aa	bb	ab	ab	aa	aa	ab	ab	uu	ab	ab	ab	uu	aa	ab	ab	ab	ab	uu	aa	ab	ab	bb	ab	bb	uu	aa	aa	aa	ab	ab	aa	ab	aa	aa	bb	ab	ab	ab	ab	ab	ab	ab	aa	ab	aa	ab
54	1	2	aa	bb	aa	aa	aa	aa	ab	ab	uu	bb	bb	bb	bb	aa	aa	bb	aa	bb	aa	aa	aa	bb	bb	bb	bb	bb	aa	aa	aa	aa	ab	aa	ab	aa	aa	bb	aa	ab	aa	ab	ab	ab	ab	aa	ab	aa	bb
55	1	2	ab	ab	ab	ab	ab	ab	aa	aa	ab	ab	ab	ab	ab	ab	ab	ab	ab	ab	ab	ab	ab	ab	ab	ab	ab	ab	ab	ab	ab	ab	aa	ab	aa	ab	ab	ab	uu	aa	ab	aa	aa	aa	aa	ab	aa	ab	ab
56	1	2	aa	bb	aa	aa	aa	aa	ab	ab	aa	bb	bb	bb	bb	aa	aa	bb	aa	bb	aa	aa	aa	uu	bb	bb	bb	bb	ab	ab	ab	ab	ab	ab	ab	ab	ab	ab	ab	ab	ab	ab	ab	ab	ab	ab	ab	bb	aa
57	1	2	ab	ab	ab	ab	ab	ab	aa	ab	ab	ab	ab	ab	ab	ab	ab	ab	ab	ab	ab	ab	ab	ab	ab	ab	ab	ab	ab	aa	ab	ab	ab	ab	ab	ab	ab	ab	ab	ab	ab	ab	ab	ab	ab	ab	ab	ab	ab
58	1	2	ab	ab	ab	ab	ab	ab	ab	ab	bb	ab	ab	ab	ab	ab	ab	ab	ab	ab	ab	ab	ab	ab	ab	ab	ab	ab	ab	uu	ab	ab	ab	ab	ab	ab	ab	ab	ab	ab	ab	ab	ab	ab	ab	ab	ab	ab	ab
59	1	2	ab	ab	ab	ab	ab	ab	aa	aa	aa	bb	bb	bb	bb	aa	aa	bb	aa	bb	aa	aa	aa	bb	bb	bb	bb	bb	aa	aa	aa	aa	ab	aa	ab	aa	aa	bb	aa	ab	aa	ab	ab	ab	ab	aa	ab	aa	bb
60	1	2	ab	ab	ab	ab	ab	ab	aa	aa	ab	ab	uu	ab	ab	ab	ab	ab	ab	ab	ab	ab	ab	ab	ab	ab	ab	ab	ab	ab	ab	ab	ab	uu	ab	aa	aa	bb	uu	ab	aa	ab	ab	ab	ab	aa	aa	ab	ab
61	1	2	ab	ab	ab	ab	ab	ab	aa	aa	ab	ab	ab	ab	ab	ab	ab	ab	bb	uu	bb	bb	bb	uu	aa	aa	aa	aa	bb	bb	uu	bb	aa	uu	aa	bb	bb	aa	bb	aa	bb	aa	aa	aa	aa	bb	aa	bb	aa
62	1	2	bb	aa	bb	bb	bb	bb	aa	aa	ab	ab	ab	ab	ab	ab	ab	ab	ab	ab	ab	ab	ab	ab	ab	ab	ab	ab	aa	aa	aa	aa	ab	aa	ab	aa	aa	bb	aa	ab	aa	ab	ab	ab	ab	aa	ab	aa	bb
63	1	2	ab	ab	ab	ab	ab	ab	ab	ab	ab	ab	ab	ab	ab	ab	ab	ab	ab	ab	ab	ab	ab	ab	ab	ab	ab	ab	ab	ab	ab	ab	ab	ab	ab	ab	ab	ab	ab	ab	ab	ab	ab	ab	ab	ab	ab	ab	ab
64	1	2	aa	bb	aa	aa	aa	aa	ab	ab	aa	bb	bb	bb	bb	aa	aa	bb	aa	bb	aa	aa	aa	bb	bb	bb	bb	bb	aa	aa	aa	aa	ab	aa	ab	aa	aa	bb	aa	ab	aa	ab	ab	ab	ab	aa	ab	aa	bb
65	1	2	aa	bb	aa	aa	aa	aa	ab	ab	aa	bb	bb	bb	bb	aa	aa	bb	aa	bb	aa	aa	aa	bb	bb	bb	bb	bb	aa	aa	aa	aa	ab	aa	ab	aa	aa	bb	aa	ab	aa	ab	ab	ab	ab	aa	ab	aa	bb
66	1	2	ab	ab	ab	ab	ab	ab	ab	ab	uu	ab	ab	ab	ab	ab	ab	ab	ab	ab	ab	ab	ab	ab	ab	ab	ab	ab	ab	ab	ab	ab	ab	ab	ab	ab	ab	ab	ab	ab	ab	ab	ab	ab	ab	ab	ab	ab	ab
67	1	2	bb	uu	bb	bb	bb	bb	aa	aa	bb	aa	aa	aa	aa	bb	bb	aa	bb	uu	bb	bb	bb	aa	aa	aa	aa	aa	bb	bb	ab	ab	ab	ab	ab	ab	ab	ab	ab	ab	ab	ab	ab	ab	ab	ab	ab	ab	ab
68	1	2	ab	ab	ab	ab	ab	ab	ab	ab	ab	ab	ab	ab	ab	ab	ab	ab	ab	ab	ab	ab	ab	ab	ab	ab	ab	ab	ab	ab	ab	ab	aa	ab	aa	ab	ab	ab	ab	aa	ab	aa	aa	aa	aa	ab	aa	ab	ab
69	1	2	bb	aa	uu	bb	bb	bb	aa	aa	bb	aa	aa	aa	aa	bb	uu	aa	bb	uu	bb	bb	bb	aa	aa	aa	aa	aa	bb	bb	bb	bb	aa	bb	aa	bb	bb	aa	bb	aa	bb	aa	aa	aa	aa	bb	aa	bb	aa
70	1	2	ab	ab	ab	ab	ab	ab	ab	ab	ab	ab	ab	ab	ab	ab	ab	ab	ab	ab	ab	ab	ab	ab	ab	ab	ab	ab	ab	ab	ab	ab	ab	ab	ab	ab	ab	ab	ab	ab	ab	ab	ab	ab	ab	ab	ab	ab	ab
71	1	2	ab	ab	ab	ab	ab	ab	aa	aa	ab	ab	ab	ab	ab	ab	ab	ab	ab	ab	ab	ab	ab	ab	ab	ab	ab	ab	ab	ab	ab	ab	aa	ab	aa	ab	ab	ab	ab	aa	ab	aa	aa	aa	aa	ab	aa	ab	ab
72	1	2	uu	ab	ab	uu	ab	ab	ab	ab	ab	ab	ab	ab	ab	uu	ab	ab	ab	ab	ab	ab	ab	ab	ab	ab	ab	uu	ab	ab	ab	ab	ab	ab	ab	ab	ab	ab	ab	ab	ab	ab	ab	ab	ab	ab	ab	ab	ab
73	1	2	aa	bb	aa	uu	aa	aa	ab	ab	aa	bb	bb	bb	bb	aa	aa	bb	aa	bb	aa	aa	aa	bb	bb	uu	bb	bb	aa	aa	aa	aa	ab	aa	ab	aa	aa	bb	aa	ab	aa	ab	ab	ab	ab	aa	ab	aa	bb
74	1	2	ab	ab	ab	ab	ab	ab	ab	ab	ab	ab	ab	ab	ab	ab	ab	ab	ab	ab	ab	ab	ab	ab	ab	ab	ab	ab	ab	ab	ab	ab	ab	aa	ab	aa	aa	bb	aa	ab	aa	ab	ab	ab	ab	aa	ab	aa	bb
75	1	2	ab	ab	ab	ab	ab	ab	aa	aa	ab	ab	ab	ab	ab	ab	ab	ab	ab	ab	ab	ab	ab	ab	ab	ab	ab	ab	ab	ab	ab	ab	aa	ab	aa	ab	ab	ab	ab	aa	aa	ab	ab	ab	ab	aa	ab	aa	bb
76	1	2	ab	ab	ab	ab	ab	ab	aa	aa	ab	aa	ab	ab	ab	ab	ab	ab	ab	ab	ab	ab	ab	ab	ab	ab	ab	ab	ab	ab	uu	ab	aa	ab	aa	ab	ab	ab	bb	aa	ab	aa	aa	aa	aa	ab	aa	ab	ab
77	1	2	aa	bb	aa	aa	aa	aa	ab	ab	aa	bb	bb	bb	bb	aa	aa	bb	aa	bb	aa	aa	aa	bb	bb	bb	bb	bb	aa	aa	aa	aa	ab	aa	ab	aa	aa	bb	aa	ab	aa	ab	aa	aa	aa	ab	aa	ab	ab
78	1	2	ab	ab	ab	ab	ab	ab	ab	ab	ab	ab	ab	ab	ab	ab	ab	ab	ab	ab	ab	ab	ab	ab	ab	ab	ab	ab	ab	ab	ab	ab	ab	ab	ab	ab	ab	ab	ab	ab	ab	ab	ab	ab	ab	ab	ab	ab	ab
79	1	2	ab	ab	ab	ab	ab	ab	aa	aa	ab	ab	ab	ab	ab	ab	ab	ab	ab	ab	ab	ab	ab	bb	bb	bb	bb	bb	aa	aa	aa	aa	ab	aa	ab	aa	aa	bb	aa	ab	aa	ab	ab	ab	ab	aa	ab	aa	bb
80	1	2	aa	bb	aa	aa	aa	aa	ab	ab	aa	bb	bb	bb	bb	aa	aa	bb	aa	bb	aa	aa	aa	bb	bb	bb	bb	bb	aa	aa	aa	aa	ab	aa	ab	aa	aa	bb	aa	ab	ab	aa	aa	aa	aa	ab	aa	ab	ab
81	1	2	ab	ab	ab	ab	ab	ab	ab	ab	ab	ab	ab	ab	ab	ab	ab	ab	ab	ab	ab	ab	ab	ab	ab	ab	ab	ab	ab	ab	ab	ab	ab	ab	ab	ab	ab	ab	ab	ab	bb	aa	aa	aa	aa	bb	aa	ab	aa
82	1	2	aa	bb	aa	aa	ab	ab	ab	ab	ab	ab	uu	ab	ab	ab	ab	ab	ab	ab	ab	ab	ab	ab	ab	ab	ab	ab	ab	aa	ab	ab	ab	ab	ab	ab	ab	ab	uu	ab	ab	ab	aa	aa	aa	uu	aa	uu	aa
83	1	2	uu	uu	bb	bb	bb	uu	aa	aa	uu	aa	ab	aa	aa	bb	bb	aa	ab	aa	bb	ab	bb	uu	uu	ab	aa	uu	ab	uu	bb	bb	aa	bb	aa	bb	ab	aa	uu	aa	ab	aa	aa	aa	aa	ab	aa	ab	aa
84	1	2	ab	ab	ab	ab	ab	ab	ab	ab	ab	ab	ab	ab	ab	ab	ab	ab	ab	ab	ab	ab	ab	ab	ab	ab	ab	ab	ab	ab	ab	ab	ab	ab	ab	ab	ab	ab	ab	ab	ab	aa	aa	aa	aa	bb	aa	bb	aa
85	1	2	ab	ab	ab	ab	ab	ab	ab	ab	ab	ab	ab	ab	ab	ab	ab	ab	ab	ab	ab	ab	ab	ab	ab	ab	ab	ab	ab	ab	ab	ab	ab	ab	ab	ab	ab	ab	ab	ab	ab	ab	ab	ab	ab	ab	ab	ab	ab
86	1	2	aa	bb	aa	aa	aa	aa	ab	ab	aa	bb	bb	bb	bb	aa	aa	bb	aa	bb	aa	aa	aa	bb	bb	bb	bb	bb	aa	aa	aa	aa	aa	ab	aa	ab	ab	ab	ab	aa	ab	aa	aa	aa	aa	ab	aa	ab	ab
87	1	2	ab	ab	ab	ab	ab	ab	aa	aa	ab	ab	ab	ab	ab	ab	ab	ab	ab	ab	ab	ab	ab	ab	ab	ab	ab	ab	ab	ab	ab	ab	aa	ab	aa	ab	ab	ab	ab	aa	ab	aa	aa	aa	aa	ab	aa	ab	ab
88	1	2	aa	uu	aa	uu	aa	uu	ab	ab	uu	bb	bb	bb	bb	uu	aa	uu	uu	uu	uu	aa	uu	uu	bb	ab	bb	uu	aa	aa	aa	uu	ab	aa	ab	aa	aa	uu	uu	ab	aa	ab	ab	ab	ab	aa	ab	uu	bb
89	1	2	ab	ab	ab	ab	uu	ab	ab	ab	ab	ab	ab	ab	ab	ab	ab	ab	ab	ab	ab	ab	ab	ab	ab	ab	ab	ab	ab	ab	ab	ab	ab	ab	ab	ab	ab	ab	ab	ab	ab	ab	ab	ab	ab	ab	ab	ab	ab
90	1	2	ab	ab	ab	ab	ab	ab	aa	aa	ab	ab	ab	ab	ab	ab	ab	ab	ab	ab	ab	ab	ab	ab	ab	ab	ab	ab	ab	ab	ab	ab	aa	ab	aa	ab	ab	ab	ab	aa	ab	aa	aa	aa	aa	ab	aa	ab	ab
91	1	2	ab	ab	ab	ab	ab	ab	ab	ab	aa	bb	bb	bb	bb	aa	aa	bb	aa	bb	aa	aa	aa	uu	bb	bb	bb	bb	aa	aa	aa	aa	ab	aa	ab	aa	aa	bb	aa	ab	aa	ab	ab	ab	ab	aa	ab	aa	bb
92	1	2	aa	bb	aa	aa	aa	aa	ab	ab	aa	bb	bb	bb	bb	aa	aa	bb	aa	bb	aa	aa	aa	bb	bb	bb	bb	bb	ab	ab	ab	ab	ab	ab	ab	ab	ab	ab	ab	ab	ab	ab	ab	ab	ab	ab	ab	ab	ab
93	1	2	bb	aa	bb	uu	uu	bb	aa	aa	ab	aa	aa	aa	aa	bb	bb	aa	bb	uu	bb	bb	uu	aa	aa	aa	aa	aa	ab	bb	bb	bb	ab	ab	ab	ab	bb	ab	ab	ab	ab	ab	ab	ab	ab	ab	ab	ab	ab
94	1	2	aa	bb	aa	aa	aa	aa	ab	ab	aa	bb	bb	bb	bb	aa	aa	bb	aa	bb	aa	aa	aa	bb	bb	bb	bb	bb	aa	aa	aa	aa	ab	aa	ab	aa	aa	bb	aa	ab	ab	aa	aa	aa	aa	ab	aa	ab	ab
95	1	2	ab	ab	ab	ab	ab	ab	ab	ab	aa	bb	bb	bb	uu	aa	aa	bb	aa	bb	aa	aa	aa	bb	bb	bb	bb	bb	aa	aa	aa	aa	ab	aa	ab	aa	aa	bb	aa	ab	aa	ab	ab	ab	ab	aa	ab	aa	bb
96	1	2	bb	uu	bb	uu	uu	uu	aa	aa	bb	aa	uu	aa	aa	uu	uu	uu	uu	uu	uu	bb	bb	ab	aa	aa	uu	aa	bb	bb	uu	uu	aa	uu	aa	bb	bb	aa	bb	aa	ab	ab	ab	ab	ab	ab	ab	ab	ab
97	1	2	ab	ab	ab	ab	uu	ab	aa	aa	ab	ab	ab	ab	ab	uu	ab	ab	ab	ab	ab	ab	ab	ab	ab	ab	ab	ab	ab	ab	ab	ab	ab	uu	ab	uu	aa	bb	uu	ab	aa	ab	ab	ab	ab	aa	ab	aa	uu
98	1	2	aa	bb	aa	aa	aa	aa	ab	ab	aa	bb	bb	bb	bb	aa	aa	bb	uu	bb	aa	aa	uu	bb	bb	bb	ab	bb	aa	aa	aa	aa	ab	aa	ab	uu	aa	bb	aa	ab	aa	ab	ab	ab	ab	aa	ab	aa	bb
99	1	2	ab	ab	ab	ab	uu	ab	aa	aa	ab	ab	ab	ab	ab	ab	ab	ab	ab	ab	ab	ab	ab	ab	ab	bb	ab	ab	ab	ab	ab	ab	aa	ab	aa	ab	ab	ab	bb	aa	aa	ab	ab	ab	ab	aa	ab	aa	bb
100	1	2	ab	ab	ab	ab	ab	ab	ab	ab	ab	ab	ab	ab	ab	ab	ab	ab	ab	ab	ab	ab	ab	ab	ab	ab	ab	ab	ab	ab	ab	ab	ab	ab	ab	ab	ab	ab	ab	ab	ab	ab	ab	ab	ab	ab	ab	ab	ab
101	1	2	aa	bb	aa	aa	aa	aa	ab	ab	aa	bb	bb	bb	bb	aa	aa	bb	aa	bb	aa	aa	aa	bb	bb	bb	bb	bb	aa	aa	aa	aa	ab	aa	ab	aa	aa	bb	ab	aa	ab	aa	aa	aa	aa	ab	aa	ab	ab
102	1	2	ab	ab	ab	ab	ab	ab	aa	aa	ab	ab	ab	ab	ab	ab	ab	ab	ab	ab	ab	ab	ab	ab	ab	ab	ab	ab	ab	ab	ab	ab	aa	ab	aa	ab	ab	ab	ab	aa	ab	ab	ab	ab	ab	aa	ab	aa	bb
103	1	2	ab	ab	ab	ab	ab	ab	ab	ab	ab	ab	ab	ab	ab	ab	ab	ab	ab	ab	ab	ab	ab	ab	ab	ab	ab	ab	ab	ab	ab	ab	ab	ab	ab	ab	ab	ab	ab	ab	ab	ab	ab	ab	ab	ab	ab	ab	ab
104	1	2	aa	bb	aa	aa	uu	aa	ab	ab	aa	bb	bb	bb	bb	aa	aa	ab	aa	bb	aa	aa	aa	bb	bb	bb	bb	bb	aa	aa	aa	aa	ab	aa	ab	aa	aa	bb	aa	ab	aa	ab	ab	ab	ab	ab	ab	aa	bb
105	1	2	aa	bb	aa	aa	ab	ab	ab	ab	uu	ab	ab	ab	ab	ab	ab	ab	ab	ab	ab	ab	ab	ab	ab	ab	ab	ab	ab	ab	ab	ab	ab	ab	ab	ab	ab	ab	ab	ab	ab	ab	ab	ab	ab	ab	ab	ab	ab
106	1	2	aa	bb	aa	aa	uu	aa	ab	ab	aa	bb	bb	bb	bb	aa	aa	bb	aa	bb	aa	aa	aa	bb	bb	uu	bb	ab	ab	ab	ab	ab	ab	ab	ab	ab	ab	ab	ab	ab	ab	ab	ab	ab	ab	ab	ab	ab	ab
107	1	2	ab	ab	ab	ab	ab	ab	aa	aa	ab	ab	ab	ab	ab	ab	ab	ab	ab	ab	ab	ab	ab	ab	ab	ab	ab	ab	ab	ab	ab	ab	aa	ab	aa	ab	ab	ab	ab	aa	ab	aa	aa	aa	aa	ab	aa	ab	ab
108	1	2	ab	ab	ab	ab	ab	ab	ab	ab	ab	ab	ab	ab	ab	ab	ab	ab	ab	ab	ab	ab	ab	ab	ab	ab	ab	ab	ab	ab	ab	ab	ab	ab	ab	ab	ab	ab	ab	ab	bb	aa	aa	aa	aa	bb	aa	bb	aa
109	1	2	bb	aa	ab	uu	uu	bb	aa	aa	ab	ab	ab	ab	ab	ab	ab	ab	ab	ab	ab	ab	ab	ab	ab	ab	ab	ab	ab	ab	ab	ab	ab	uu	ab	aa	aa	bb	aa	ab	aa	ab	ab	ab	ab	aa	ab	aa	uu
110	1	2	aa	bb	aa	aa	aa	aa	ab	ab	aa	bb	bb	bb	bb	aa	aa	bb	aa	bb	aa	aa	uu	bb	bb	bb	bb	bb	aa	aa	aa	aa	ab	aa	ab	aa	aa	bb	aa	ab	aa	ab	ab	ab	ab	aa	ab	aa	bb
111	1	2	ab	ab	ab	ab	ab	ab	ab	ab	ab	ab	ab	ab	ab	ab	ab	uu	ab	ab	uu	ab	uu	ab	ab	ab	ab	ab	ab	ab	ab	ab	ab	ab	ab	ab	ab	ab	ab	ab	ab	ab	ab	ab	ab	ab	ab	ab	ab
112	1	2	ab	ab	ab	ab	ab	ab	aa	aa	ab	ab	ab	ab	ab	ab	ab	ab	ab	ab	ab	ab	ab	ab	ab	ab	ab	ab	ab	ab	ab	ab	aa	ab	aa	ab	ab	ab	ab	aa	ab	aa	aa	aa	aa	ab	aa	ab	ab
113	1	2	ab	ab	ab	ab	ab	ab	aa	aa	ab	ab	ab	ab	ab	ab	ab	ab	ab	ab	ab	ab	ab	ab	ab	ab	ab	ab	ab	ab	ab	ab	aa	ab	aa	ab	ab	ab	ab	aa	ab	aa	aa	aa	aa	ab	aa	ab	ab
114	1	2	aa	bb	aa	aa	aa	aa	ab	ab	aa	bb	bb	bb	bb	aa	aa	bb	aa	bb	uu	aa	aa	bb	bb	bb	bb	bb	aa	aa	aa	aa	ab	aa	ab	aa	aa	bb	aa	ab	aa	ab	ab	ab	ab	ab	ab	aa	bb
115	1	2	ab	ab	ab	ab	ab	ab	aa	aa	ab	ab	ab	ab	ab	ab	ab	ab	ab	ab	ab	ab	ab	ab	ab	ab	ab	ab	ab	ab	ab	ab	aa	ab	aa	ab	ab	ab	ab	aa	ab	aa	aa	aa	aa	ab	aa	ab	ab
116	1	2	aa	bb	aa	aa	aa	aa	ab	ab	aa	bb	bb	bb	bb	aa	aa	bb	aa	bb	aa	aa	aa	bb	bb	bb	bb	bb	aa	aa	aa	aa	ab	aa	ab	aa	aa	bb	aa	ab	aa	ab	ab	ab	ab	aa	ab	aa	bb
117	1	2	ab	ab	ab	ab	ab	ab	aa	aa	bb	aa	aa	aa	aa	bb	bb	aa	bb	uu	bb	bb	bb	aa	aa	aa	aa	aa	bb	bb	bb	bb	aa	bb	aa	bb	bb	aa	bb	aa	ab	ab	ab	ab	ab	ab	ab	ab	ab
118	1	2	ab	ab	ab	ab	ab	ab	aa	aa	uu	ab	ab	ab	ab	ab	ab	ab	ab	ab	uu	ab	ab	ab	ab	ab	ab	ab	ab	ab	ab	ab	aa	ab	aa	ab	ab	ab	ab	aa	aa	ab	ab	ab	ab	aa	ab	aa	ab
119	1	2	ab	ab	ab	ab	ab	ab	aa	aa	ab	ab	ab	ab	ab	ab	ab	ab	ab	ab	ab	ab	ab	ab	ab	ab	ab	ab	ab	ab	ab	ab	aa	ab	ab	ab	ab	bb	aa	ab	aa	ab	ab	ab	ab	aa	ab	aa	bb
120	1	2	aa	uu	aa	aa	aa	aa	ab	ab	aa	bb	bb	bb	bb	uu	aa	bb	aa	bb	aa	aa	aa	bb	bb	bb	bb	bb	aa	aa	aa	aa	ab	aa	ab	aa	aa	bb	aa	ab	aa	ab	ab	ab	ab	aa	ab	aa	bb
121	1	2	aa	bb	aa	aa	aa	aa	ab	ab	aa	bb	bb	bb	bb	aa	aa	bb	aa	bb	aa	aa	aa	bb	bb	uu	bb	bb	aa	aa	aa	aa	ab	aa	ab	aa	aa	bb	aa	ab	aa	ab	ab	ab	ab	aa	ab	ab	ab
122	1	2	ab	ab	ab	ab	ab	ab	aa	aa	uu	ab	ab	ab	ab	ab	ab	ab	ab	ab	ab	ab	ab	ab	ab	ab	ab	ab	ab	uu	ab	ab	aa	ab	aa	ab	ab	ab	aa	ab	aa	ab	ab	ab	ab	aa	ab	aa	bb
123	1	2	bb	aa	bb	bb	bb	bb	aa	aa	bb	aa	aa	aa	aa	bb	bb	aa	bb	aa	bb	bb	uu	aa	aa	aa	aa	uu	bb	uu	bb	bb	ab	ab	ab	ab	ab	ab	ab	ab	ab	ab	ab	ab	ab	ab	ab	ab	ab
124	1	2	ab	ab	ab	ab	ab	ab	aa	aa	ab	ab	ab	ab	ab	ab	ab	ab	ab	ab	ab	ab	ab	ab	ab	ab	ab	ab	ab	ab	ab	ab	aa	ab	aa	ab	ab	ab	ab	aa	ab	aa	aa	aa	aa	ab	aa	ab	ab
125	1	2	bb	uu	bb	bb	uu	bb	aa	aa	ab	ab	ab	ab	ab	ab	ab	ab	ab	ab	ab	ab	ab	ab	ab	ab	ab	ab	ab	ab	ab	ab	aa	ab	aa	ab	ab	ab	ab	aa	aa	ab	ab	ab	ab	aa	ab	aa	bb
126	1	2	aa	bb	aa	aa	aa	aa	ab	ab	aa	bb	bb	bb	bb	aa	aa	bb	aa	bb	aa	aa	uu	bb	bb	bb	bb	ab	ab	ab	ab	ab	ab	ab	ab	ab	ab	ab	ab	ab	bb	aa	aa	aa	aa	bb	aa	bb	aa
127	1	2	aa	bb	aa	aa	aa	aa	ab	ab	aa	bb	bb	bb	bb	aa	aa	bb	aa	bb	aa	aa	aa	bb	bb	bb	bb	bb	aa	aa	aa	aa	ab	aa	ab	aa	aa	uu	aa	ab	aa	ab	ab	ab	ab	aa	ab	aa	bb
128	1	2	ab	ab	ab	ab	ab	ab	aa	aa	ab	ab	ab	ab	ab	ab	ab	ab	ab	ab	ab	ab	ab	ab	ab	ab	ab	ab	ab	ab	ab	ab	aa	ab	aa	ab	ab	ab	ab	aa	ab	aa	aa	aa	aa	ab	aa	ab	ab
129	1	2	ab	ab	ab	ab	ab	ab	aa	aa	ab	ab	ab	ab	ab	ab	ab	ab	ab	ab	ab	ab	ab	ab	ab	ab	ab	ab	ab	ab	ab	ab	aa	ab	aa	ab	ab	ab	ab	aa	ab	aa	aa	aa	aa	ab	aa	ab	ab
130	1	2	ab	aa	bb	uu	bb	bb	aa	aa	uu	aa	aa	aa	uu	uu	bb	aa	bb	aa	bb	bb	uu	ab	aa	uu	aa	aa	ab	ab	uu	bb	aa	bb	aa	bb	bb	aa	bb	aa	uu	aa	aa	aa	aa	uu	aa	bb	aa
131	1	2	bb	uu	bb	bb	bb	bb	aa	aa	uu	aa	aa	aa	uu	bb	bb	uu	bb	uu	uu	bb	uu	aa	aa	aa	aa	aa	uu	uu	ab	ab	ab	ab	ab	ab	ab	ab	uu	ab	ab	ab	ab	ab	ab	ab	ab	ab	ab
132	1	2	ab	ab	ab	ab	uu	ab	ab	ab	ab	ab	ab	ab	ab	ab	ab	ab	uu	ab	ab	ab	ab	ab	uu	ab	ab	ab	uu	ab	ab	ab	ab	ab	ab	ab	ab	ab	ab	ab	ab	ab	ab	ab	ab	ab	ab	ab	ab
133	1	2	ab	ab	ab	ab	ab	ab	aa	aa	ab	ab	ab	ab	ab	ab	ab	ab	ab	ab	ab	ab	ab	ab	ab	ab	ab	aa	bb	bb	bb	bb	aa	bb	aa	bb	bb	aa	bb	aa	bb	aa	aa	aa	aa	bb	aa	ab	aa
134	1	2	aa	bb	aa	aa	aa	ab	ab	ab	ab	ab	ab	ab	ab	ab	ab	ab	ab	ab	ab	ab	ab	ab	ab	ab	ab	ab	ab	ab	ab	ab	ab	ab	ab	ab	ab	ab	ab	ab	ab	ab	ab	ab	ab	ab	ab	ab	ab
135	1	2	ab	ab	ab	ab	ab	ab	ab	ab	ab	ab	ab	ab	ab	ab	ab	ab	ab	ab	ab	ab	ab	ab	ab	ab	ab	ab	ab	ab	ab	ab	ab	ab	ab	ab	ab	ab	ab	ab	ab	ab	ab	ab	ab	ab	ab	ab	ab
136	1	2	ab	ab	ab	ab	ab	ab	aa	aa	ab	uu	ab	ab	ab	ab	ab	ab	ab	ab	ab	ab	ab	ab	ab	ab	ab	ab	ab	ab	ab	ab	aa	ab	aa	ab	ab	ab	ab	aa	ab	aa	aa	aa	aa	ab	aa	ab	ab
137	1	2	aa	bb	aa	aa	aa	aa	ab	ab	aa	bb	bb	bb	bb	aa	aa	bb	aa	bb	aa	aa	aa	bb	bb	bb	bb	bb	aa	aa	aa	aa	ab	aa	ab	aa	aa	bb	aa	ab	ab	aa	aa	aa	aa	ab	aa	ab	ab
138	1	2	aa	bb	aa	aa	aa	aa	ab	ab	aa	bb	bb	bb	uu	aa	aa	bb	aa	bb	aa	aa	aa	bb	bb	bb	bb	bb	aa	aa	aa	aa	ab	aa	ab	aa	aa	bb	aa	ab	aa	ab	ab	ab	ab	aa	ab	aa	bb
139	1	2	ab	ab	ab	ab	ab	ab	aa	aa	ab	ab	ab	ab	uu	ab	ab	ab	bb	uu	bb	bb	bb	uu	aa	aa	aa	aa	bb	bb	uu	uu	aa	bb	aa	bb	bb	uu	bb	aa	bb	ab	ab	ab	ab	ab	ab	ab	ab
140	1	2	ab	ab	ab	ab	ab	ab	ab	ab	bb	ab	ab	ab	ab	ab	ab	ab	ab	ab	ab	ab	ab	ab	ab	ab	ab	ab	ab	ab	ab	ab	ab	ab	ab	ab	ab	ab	ab	ab	ab	ab	ab	ab	ab	ab	ab	ab	ab
141	1	2	uu	uu	bb	uu	bb	bb	aa	aa	uu	aa	aa	aa	aa	uu	bb	uu	bb	aa	bb	bb	bb	uu	aa	aa	aa	aa	ab	bb	bb	bb	aa	uu	aa	bb	bb	uu	ab	ab	ab	ab	ab	ab	ab	ab	ab	ab	ab
142	1	2	ab	ab	ab	ab	ab	ab	aa	aa	ab	ab	ab	ab	ab	ab	ab	ab	ab	ab	ab	ab	ab	ab	ab	ab	ab	ab	ab	ab	ab	ab	aa	ab	aa	ab	ab	ab	ab	aa	ab	aa	aa	aa	aa	ab	aa	ab	ab
143	1	2	aa	bb	aa	aa	aa	aa	ab	ab	aa	bb	bb	bb	bb	aa	aa	bb	aa	bb	aa	aa	aa	bb	bb	bb	bb	bb	aa	aa	ab	ab	aa	ab	aa	ab	ab	ab	ab	aa	ab	aa	aa	aa	aa	ab	aa	ab	ab
144	1	2	ab	ab	ab	ab	ab	ab	aa	aa	uu	ab	ab	ab	ab	ab	ab	ab	ab	ab	ab	ab	uu	aa	aa	aa	aa	aa	bb	bb	uu	uu	aa	uu	aa	uu	bb	aa	bb	aa	ab	ab	ab	ab	ab	ab	ab	ab	ab
145	1	2	ab	ab	ab	ab	ab	ab	aa	aa	ab	ab	uu	ab	ab	ab	ab	ab	ab	ab	ab	ab	ab	ab	ab	ab	ab	ab	ab	aa	ab	ab	ab	aa	ab	aa	aa	bb	aa	ab	aa	ab	ab	ab	ab	aa	ab	aa	bb
146	1	2	ab	ab	ab	ab	ab	ab	aa	aa	ab	ab	ab	ab	ab	ab	ab	ab	ab	ab	ab	ab	ab	ab	ab	ab	ab	ab	ab	ab	ab	ab	aa	ab	aa	ab	ab	ab	ab	aa	ab	aa	aa	aa	aa	ab	aa	ab	ab
147	1	2	aa	uu	aa	aa	aa	aa	ab	ab	aa	bb	bb	bb	bb	aa	aa	bb	aa	bb	aa	aa	aa	bb	bb	bb	bb	bb	aa	aa	aa	aa	ab	aa	ab	aa	aa	uu	aa	ab	aa	ab	ab	ab	ab	aa	ab	aa	bb
148	1	2	ab	ab	ab	ab	ab	ab	aa	aa	ab	ab	ab	ab	ab	ab	ab	ab	ab	ab	ab	ab	ab	ab	ab	ab	ab	ab	ab	ab	ab	ab	aa	ab	aa	ab	ab	ab	ab	aa	aa	ab	ab	ab	ab	aa	ab	aa	bb
149	1	2	aa	bb	aa	aa	aa	aa	ab	ab	aa	bb	bb	bb	bb	aa	aa	bb	aa	bb	aa	aa	aa	bb	bb	bb	bb	bb	aa	aa	aa	aa	ab	aa	ab	aa	aa	bb	aa	ab	aa	ab	ab	ab	ab	aa	ab	aa	bb
150	1	2	aa	uu	aa	aa	aa	aa	ab	ab	aa	bb	bb	bb	bb	aa	aa	bb	aa	bb	aa	aa	aa	bb	bb	bb	bb	bb	aa	aa	aa	uu	ab	aa	ab	aa	aa	bb	ab	aa	ab	aa	aa	aa	aa	ab	aa	ab	ab
151	1	2	ab	ab	ab	uu	ab	ab	ab	ab	ab	ab	ab	ab	ab	uu	ab	ab	ab	ab	ab	ab	ab	uu	ab	ab	ab	ab	ab	ab	ab	ab	ab	ab	ab	ab	ab	ab	ab	ab	bb	aa	aa	aa	aa	bb	aa	bb	uu
152	1	2	aa	bb	aa	aa	aa	aa	ab	ab	aa	bb	bb	bb	bb	aa	aa	bb	aa	bb	aa	aa	aa	bb	bb	bb	bb	bb	aa	aa	aa	aa	ab	aa	ab	aa	aa	bb	aa	ab	aa	ab	ab	ab	ab	aa	ab	aa	bb
153	1	2	bb	aa	bb	bb	bb	bb	aa	aa	ab	ab	ab	ab	ab	ab	ab	ab	ab	ab	ab	ab	ab	ab	ab	ab	ab	ab	ab	ab	ab	ab	aa	ab	aa	ab	ab	ab	ab	aa	ab	aa	aa	aa	aa	ab	aa	ab	ab
154	1	2	bb	aa	bb	bb	bb	bb	aa	aa	bb	aa	aa	aa	aa	bb	bb	aa	bb	uu	bb	bb	bb	aa	aa	aa	aa	aa	bb	bb	bb	bb	aa	ab	aa	ab	ab	ab	ab	aa	ab	aa	aa	aa	aa	ab	aa	ab	ab
155	1	2	bb	uu	bb	bb	uu	uu	aa	aa	bb	aa	uu	uu	aa	bb	bb	aa	bb	uu	uu	bb	ab	aa	aa	aa	aa	aa	bb	uu	bb	bb	aa	bb	aa	bb	bb	aa	bb	aa	ab	ab	ab	ab	ab	ab	ab	ab	ab
156	1	2	ab	ab	ab	ab	ab	ab	ab	ab	ab	ab	ab	ab	ab	ab	ab	ab	ab	ab	ab	ab	ab	ab	ab	ab	ab	ab	ab	ab	ab	ab	aa	bb	aa	bb	bb	aa	bb	aa	bb	aa	aa	aa	aa	bb	aa	bb	aa
157	1	2	aa	bb	aa	aa	aa	aa	ab	ab	aa	bb	bb	bb	bb	aa	aa	bb	aa	bb	aa	aa	aa	bb	bb	bb	bb	bb	aa	aa	aa	aa	ab	aa	ab	aa	aa	bb	aa	ab	aa	ab	ab	ab	ab	aa	ab	aa	bb
158	1	2	ab	ab	ab	ab	ab	ab	ab	ab	ab	ab	ab	ab	ab	ab	ab	ab	ab	ab	ab	ab	ab	ab	ab	ab	ab	ab	ab	ab	ab	ab	ab	ab	ab	ab	ab	ab	ab	ab	ab	ab	ab	ab	ab	ab	ab	ab	ab
159	1	2	bb	aa	bb	bb	bb	bb	aa	aa	bb	aa	aa	aa	aa	bb	bb	aa	bb	aa	bb	bb	bb	aa	aa	aa	aa	aa	uu	bb	bb	bb	aa	bb	aa	bb	bb	aa	ab	ab	ab	ab	ab	ab	ab	ab	ab	ab	ab
160	1	2	ab	ab	ab	ab	ab	ab	aa	aa	ab	ab	ab	ab	ab	ab	ab	ab	ab	ab	ab	ab	ab	ab	ab	ab	ab	ab	ab	ab	ab	ab	aa	ab	aa	ab	ab	ab	ab	aa	ab	aa	aa	aa	aa	ab	aa	ab	ab
161	1	2	ab	ab	ab	ab	ab	ab	ab	ab	ab	ab	ab	ab	ab	ab	ab	ab	ab	ab	ab	ab	ab	ab	ab	ab	ab	ab	ab	ab	ab	ab	ab	ab	ab	ab	ab	ab	bb	aa	bb	aa	aa	aa	aa	bb	aa	bb	aa
162	1	2	ab	ab	ab	ab	ab	ab	aa	aa	bb	ab	ab	ab	ab	ab	ab	ab	ab	ab	ab	ab	ab	ab	ab	ab	ab	ab	ab	ab	ab	ab	aa	ab	aa	ab	ab	ab	ab	aa	ab	aa	aa	aa	aa	ab	aa	ab	ab
163	1	2	bb	aa	bb	bb	bb	bb	aa	aa	bb	uu	aa	aa	uu	bb	bb	aa	bb	uu	bb	bb	bb	aa	aa	aa	aa	aa	bb	uu	ab	ab	ab	ab	ab	ab	ab	ab	ab	ab	ab	ab	ab	ab	ab	ab	ab	ab	ab
164	1	2	ab	ab	ab	ab	ab	ab	aa	aa	ab	ab	ab	ab	ab	ab	ab	ab	ab	ab	ab	ab	ab	ab	ab	ab	ab	ab	ab	ab	ab	ab	ab	aa	ab	aa	aa	bb	aa	ab	aa	ab	ab	ab	ab	aa	ab	aa	bb
165	1	2	aa	bb	aa	aa	aa	aa	ab	ab	aa	bb	bb	bb	bb	aa	aa	bb	aa	bb	aa	aa	aa	bb	bb	bb	bb	bb	aa	aa	aa	aa	ab	aa	ab	aa	aa	bb	aa	ab	aa	ab	ab	ab	ab	aa	ab	aa	bb
166	1	2	ab	ab	ab	ab	ab	ab	aa	aa	ab	ab	ab	ab	ab	ab	ab	ab	ab	ab	ab	ab	ab	ab	ab	ab	ab	ab	ab	ab	ab	ab	aa	ab	aa	ab	ab	ab	ab	aa	ab	ab	ab	ab	ab	aa	ab	aa	bb
167	1	2	aa	bb	aa	aa	aa	aa	ab	ab	aa	bb	bb	bb	bb	aa	aa	bb	uu	bb	uu	aa	aa	bb	bb	bb	bb	bb	aa	aa	aa	aa	ab	aa	ab	aa	aa	bb	uu	ab	ab	aa	aa	aa	aa	ab	aa	ab	uu
168	1	2	ab	ab	ab	ab	ab	ab	aa	aa	ab	ab	aa	ab	ab	ab	ab	ab	ab	ab	ab	ab	ab	ab	ab	ab	ab	ab	ab	ab	ab	ab	aa	ab	aa	ab	ab	ab	ab	aa	ab	aa	aa	aa	aa	ab	aa	ab	ab
169	1	2	bb	aa	bb	bb	bb	bb	aa	aa	bb	aa	aa	aa	aa	bb	bb	aa	bb	aa	bb	bb	bb	aa	aa	aa	aa	aa	bb	bb	bb	bb	aa	bb	aa	bb	bb	aa	bb	aa	ab	ab	ab	ab	ab	ab	ab	ab	ab
170	1	2	aa	bb	aa	aa	aa	aa	ab	ab	aa	bb	bb	bb	uu	uu	aa	bb	aa	bb	aa	aa	aa	bb	bb	uu	bb	bb	aa	aa	aa	aa	ab	uu	ab	aa	aa	bb	aa	ab	ab	aa	aa	aa	aa	ab	aa	ab	ab
171	1	2	ab	ab	ab	ab	ab	ab	aa	aa	ab	ab	ab	ab	ab	ab	ab	ab	ab	ab	ab	ab	ab	ab	ab	ab	ab	ab	ab	ab	ab	ab	aa	ab	aa	ab	ab	ab	ab	aa	ab	aa	aa	aa	aa	ab	aa	ab	ab
172	1	2	ab	ab	ab	ab	ab	ab	aa	aa	ab	ab	uu	ab	ab	ab	ab	ab	ab	ab	ab	ab	ab	ab	ab	ab	ab	ab	aa	aa	aa	aa	ab	aa	ab	aa	aa	bb	aa	ab	aa	ab	ab	ab	ab	aa	ab	aa	bb
173	1	2	ab	ab	ab	ab	ab	ab	ab	ab	ab	ab	ab	ab	ab	ab	ab	ab	ab	ab	ab	ab	ab	ab	ab	ab	ab	ab	ab	ab	ab	ab	ab	ab	ab	ab	ab	ab	ab	ab	ab	ab	ab	ab	ab	ab	ab	ab	ab
174	1	2	ab	ab	ab	ab	ab	ab	ab	ab	ab	ab	ab	ab	ab	ab	ab	ab	ab	ab	ab	ab	ab	ab	ab	ab	ab	ab	ab	ab	ab	ab	ab	ab	ab	ab	ab	ab	ab	aa	bb	aa	aa	aa	aa	bb	aa	bb	aa
175	1	2	bb	aa	bb	bb	bb	bb	aa	aa	bb	aa	aa	aa	aa	bb	bb	aa	bb	aa	bb	bb	bb	aa	aa	aa	aa	aa	bb	bb	bb	bb	aa	bb	aa	bb	bb	aa	bb	aa	bb	aa	aa	aa	aa	bb	aa	bb	aa
176	1	2	ab	ab	ab	ab	ab	ab	ab	ab	ab	ab	ab	ab	ab	ab	ab	ab	ab	ab	ab	ab	ab	ab	ab	ab	ab	ab	ab	ab	ab	ab	ab	ab	ab	ab	ab	ab	ab	ab	ab	ab	ab	ab	ab	ab	ab	ab	ab
177	1	2	ab	uu	ab	ab	ab	ab	aa	aa	ab	uu	ab	ab	ab	ab	ab	ab	ab	ab	ab	ab	uu	uu	ab	ab	ab	ab	ab	ab	ab	ab	aa	ab	aa	ab	ab	ab	uu	aa	ab	aa	aa	aa	aa	ab	aa	ab	ab
178	1	2	ab	ab	ab	ab	ab	ab	ab	ab	aa	bb	bb	bb	bb	aa	aa	bb	aa	bb	aa	aa	aa	bb	bb	bb	bb	bb	aa	aa	aa	aa	aa	ab	aa	ab	ab	ab	ab	aa	ab	aa	aa	aa	aa	ab	aa	ab	ab
179	1	2	ab	ab	ab	uu	ab	ab	ab	ab	ab	ab	ab	ab	ab	ab	ab	uu	ab	ab	ab	ab	uu	uu	ab	ab	ab	ab	ab	ab	ab	ab	ab	uu	ab	ab	ab	ab	bb	aa	bb	aa	aa	aa	aa	bb	aa	bb	uu
180	1	2	ab	ab	ab	ab	ab	ab	aa	aa	ab	ab	ab	ab	ab	ab	ab	ab	ab	ab	ab	ab	ab	ab	ab	ab	ab	ab	ab	ab	ab	ab	aa	ab	aa	ab	ab	ab	ab	aa	ab	aa	aa	aa	aa	ab	aa	ab	ab
181	1	2	ab	ab	ab	ab	ab	ab	ab	ab	ab	ab	ab	ab	ab	ab	ab	ab	ab	ab	ab	ab	ab	ab	ab	ab	ab	ab	ab	ab	ab	ab	ab	ab	ab	ab	ab	ab	ab	ab	ab	ab	ab	ab	ab	ab	ab	ab	ab
182	1	2	ab	ab	ab	ab	ab	ab	ab	ab	ab	ab	ab	ab	ab	ab	ab	ab	ab	ab	ab	ab	ab	ab	ab	ab	ab	ab	ab	ab	ab	ab	ab	ab	ab	uu	ab	ab	ab	ab	ab	ab	ab	ab	ab	ab	ab	ab	ab
183	1	2	ab	ab	ab	ab	uu	aa	ab	ab	aa	bb	bb	bb	bb	aa	aa	bb	aa	bb	aa	aa	aa	bb	bb	bb	bb	bb	aa	aa	aa	aa	ab	aa	ab	aa	aa	bb	aa	ab	aa	ab	ab	ab	ab	aa	ab	aa	uu
184	1	2	uu	aa	bb	bb	uu	ab	aa	aa	bb	uu	ab	aa	aa	bb	ab	uu	ab	ab	ab	ab	uu	ab	ab	ab	ab	ab	ab	ab	ab	ab	aa	ab	aa	ab	ab	ab	bb	aa	ab	aa	aa	aa	aa	ab	aa	ab	ab
185	1	2	ab	ab	ab	ab	ab	ab	ab	ab	ab	ab	uu	ab	ab	ab	ab	ab	ab	ab	ab	ab	ab	ab	ab	ab	ab	ab	ab	ab	ab	ab	aa	bb	aa	bb	bb	aa	bb	aa	bb	aa	aa	aa	aa	bb	aa	uu	aa
186	1	2	bb	aa	bb	bb	ab	ab	aa	aa	ab	ab	ab	ab	ab	ab	ab	ab	ab	ab	ab	ab	ab	ab	ab	ab	ab	ab	ab	ab	ab	ab	aa	ab	aa	ab	ab	ab	ab	aa	ab	aa	aa	aa	aa	ab	aa	ab	ab
187	1	2	ab	ab	ab	ab	ab	ab	ab	ab	ab	ab	ab	ab	ab	ab	ab	ab	ab	ab	ab	ab	ab	ab	ab	ab	ab	ab	ab	ab	ab	ab	ab	ab	ab	ab	ab	ab	bb	aa	bb	aa	aa	aa	aa	bb	aa	ab	aa
188	1	2	bb	aa	bb	bb	uu	bb	aa	aa	bb	aa	aa	aa	aa	uu	bb	aa	bb	uu	uu	bb	uu	aa	aa	aa	aa	uu	bb	bb	bb	bb	aa	bb	aa	bb	bb	aa	bb	aa	bb	ab	ab	ab	ab	ab	ab	ab	ab
189	1	2	ab	ab	ab	ab	ab	ab	aa	aa	ab	ab	ab	ab	ab	ab	ab	ab	ab	ab	ab	ab	ab	ab	ab	ab	ab	ab	ab	ab	ab	ab	aa	ab	aa	ab	ab	ab	ab	aa	ab	aa	aa	aa	aa	ab	aa	aa	bb
190	1	2	aa	bb	aa	aa	aa	aa	ab	ab	aa	bb	bb	bb	bb	uu	aa	bb	aa	bb	aa	aa	aa	bb	bb	bb	bb	bb	aa	aa	aa	aa	ab	aa	ab	aa	aa	bb	aa	ab	ab	aa	aa	aa	aa	ab	aa	ab	ab
191	1	2	ab	ab	ab	ab	ab	ab	ab	ab	ab	ab	ab	ab	ab	ab	ab	ab	ab	ab	ab	ab	ab	ab	ab	ab	ab	ab	ab	ab	ab	ab	ab	ab	ab	ab	ab	ab	ab	ab	ab	aa	aa	aa	aa	bb	aa	bb	aa
192	1	2	aa	bb	aa	aa	aa	aa	ab	ab	ab	ab	ab	ab	ab	ab	ab	ab	ab	ab	ab	ab	ab	ab	ab	ab	ab	ab	ab	ab	ab	ab	ab	ab	ab	ab	ab	ab	ab	ab	ab	ab	ab	ab	ab	ab	ab	ab	ab
193	1	2	aa	bb	aa	aa	aa	aa	ab	ab	aa	bb	bb	bb	bb	aa	aa	bb	aa	bb	aa	aa	aa	bb	bb	bb	bb	bb	aa	aa	aa	aa	ab	aa	ab	aa	aa	bb	aa	ab	ab	aa	aa	aa	aa	ab	aa	ab	ab
194	1	2	ab	ab	ab	ab	ab	ab	ab	ab	ab	ab	ab	ab	ab	ab	ab	ab	ab	ab	ab	ab	ab	ab	ab	ab	ab	ab	ab	ab	ab	ab	ab	ab	ab	ab	ab	ab	ab	ab	ab	ab	ab	ab	ab	ab	ab	ab	ab
195	1	2	aa	bb	aa	aa	aa	aa	ab	ab	aa	bb	bb	bb	bb	aa	aa	bb	aa	bb	aa	aa	aa	bb	bb	bb	bb	bb	aa	aa	aa	aa	ab	aa	ab	aa	aa	bb	aa	ab	aa	ab	ab	ab	ab	aa	ab	ab	ab
196	1	2	aa	bb	aa	aa	aa	aa	ab	ab	aa	bb	bb	bb	bb	aa	aa	uu	aa	bb	aa	aa	aa	bb	bb	bb	bb	bb	aa	aa	aa	aa	ab	aa	ab	aa	aa	bb	aa	ab	ab	aa	aa	aa	aa	ab	aa	ab	ab
197	1	2	ab	ab	ab	ab	ab	ab	ab	ab	ab	ab	ab	ab	ab	ab	ab	ab	ab	ab	ab	ab	ab	ab	ab	ab	ab	ab	ab	ab	ab	ab	ab	ab	ab	ab	ab	ab	ab	ab	ab	ab	ab	ab	ab	ab	ab	bb	aa
198	1	2	ab	ab	ab	ab	ab	ab	aa	aa	bb	ab	ab	ab	ab	ab	ab	ab	ab	ab	ab	ab	ab	ab	ab	ab	ab	ab	ab	ab	ab	ab	ab	aa	ab	aa	aa	bb	aa	ab	aa	ab	ab	ab	ab	aa	ab	aa	bb
199	1	2	ab	ab	ab	ab	ab	ab	ab	ab	ab	ab	ab	ab	ab	ab	ab	ab	ab	ab	ab	ab	ab	ab	ab	ab	ab	ab	ab	ab	ab	ab	ab	ab	ab	ab	ab	ab	ab	ab	ab	ab	ab	ab	ab	ab	ab	bb	uu
200	1	2	aa	bb	aa	aa	aa	aa	ab	ab	aa	bb	bb	bb	bb	aa	aa	bb	aa	ab	ab	ab	ab	ab	ab	ab	ab	ab	ab	ab	ab	ab	ab	ab	ab	ab	ab	ab	ab	ab	ab	ab	ab	ab	ab	ab	ab	ab	ab
201	1	2	ab	ab	ab	ab	ab	ab	aa	aa	ab	ab	uu	ab	ab	ab	ab	ab	ab	ab	ab	ab	ab	ab	ab	ab	ab	ab	ab	ab	ab	ab	aa	ab	aa	ab	ab	ab	ab	aa	ab	aa	aa	aa	aa	ab	aa	aa	bb
202	1	2	ab	ab	ab	ab	ab	ab	aa	aa	ab	ab	ab	ab	ab	ab	ab	ab	ab	ab	ab	ab	ab	ab	ab	ab	ab	ab	ab	ab	aa	aa	ab	aa	ab	aa	aa	bb	aa	ab	aa	ab	ab	ab	ab	aa	ab	aa	bb
203	1	2	bb	aa	bb	bb	bb	bb	aa	aa	bb	aa	aa	aa	aa	bb	bb	aa	bb	uu	bb	bb	uu	aa	aa	aa	aa	aa	uu	bb	bb	bb	aa	bb	aa	bb	bb	aa	uu	aa	ab	ab	ab	ab	ab	ab	ab	ab	ab
204	1	2	aa	bb	aa	aa	aa	aa	ab	ab	aa	ab	bb	bb	bb	uu	aa	bb	aa	bb	aa	aa	aa	bb	bb	bb	bb	bb	aa	aa	aa	aa	ab	aa	ab	aa	aa	bb	aa	ab	aa	ab	ab	ab	ab	aa	ab	aa	bb
205	1	2	ab	ab	ab	ab	ab	ab	aa	aa	ab	ab	ab	ab	ab	ab	ab	ab	ab	ab	ab	ab	ab	ab	ab	ab	ab	ab	ab	ab	ab	ab	aa	ab	aa	ab	ab	ab	ab	aa	ab	aa	aa	aa	aa	ab	aa	aa	bb
206	1	2	bb	uu	bb	bb	bb	bb	aa	aa	bb	uu	aa	aa	aa	bb	bb	aa	bb	uu	bb	bb	bb	aa	aa	aa	aa	aa	bb	bb	bb	bb	aa	uu	aa	bb	bb	aa	bb	aa	bb	aa	aa	aa	aa	bb	aa	bb	aa
207	1	2	ab	ab	ab	ab	ab	ab	aa	aa	ab	ab	ab	ab	ab	ab	ab	ab	ab	ab	ab	ab	ab	ab	ab	ab	ab	ab	ab	ab	ab	ab	aa	ab	aa	ab	ab	ab	ab	aa	ab	aa	aa	aa	aa	ab	aa	ab	ab
208	1	2	ab	uu	ab	ab	ab	ab	aa	aa	ab	ab	ab	ab	ab	ab	ab	ab	ab	ab	ab	ab	ab	ab	ab	ab	ab	ab	ab	ab	ab	ab	aa	ab	aa	ab	ab	ab	ab	aa	ab	aa	aa	aa	aa	ab	aa	ab	ab
209	1	2	ab	uu	ab	uu	ab	ab	ab	ab	uu	ab	ab	ab	uu	uu	ab	ab	ab	ab	uu	ab	uu	ab	ab	ab	ab	ab	ab	ab	ab	ab	ab	ab	ab	uu	ab	ab	ab	ab	ab	ab	ab	aa	aa	ab	aa	bb	aa
210	1	2	ab	ab	ab	ab	ab	ab	aa	aa	ab	ab	ab	ab	ab	ab	ab	ab	ab	ab	ab	ab	ab	ab	ab	ab	ab	ab	ab	ab	ab	ab	aa	ab	aa	ab	ab	ab	ab	ab	aa	ab	ab	ab	ab	aa	ab	aa	uu
[truncated: 609 more columns]

## Sheet: info2331
marker	locus-Chr_v1
m2	chr07-54230281
m4	chr07-53835537
m7	chr07-55008420
m8	chr07-53929163
m9	chr07-53731592
m10	chr07-52763830
m12	chr07-54529241
m13	chr07-45506572
m14	chr07-51254940
m15	chr07-51276464
m17	chr07-47890462
m20	chr07-50650423
m22	chr07-50741103
m23	chr07-49828608
m25	chr07-50642120
m27	chr07-50498502
m29	chr07-46081176
m30	chr07-44397900
m33	chr07-43930630
m34	chr07-44167397
m37	chr07-42481211
m39	chr07-42202515
m41	chr07-41554359
m42	chr07-41412506
m44	chr07-41620064
m45	chr07-41373627
m46	chr07-40424507
m48	chr07-39929688
m49	chr07-38537037
m50	chr07-38335411
m56	chr07-35312103
m57	chr07-35995679
m58	chr07-35237282
m59	chr07-36553572
m60	chr07-36973651
m61	chr07-35302881
m63	chr07-34303942
m64	chr07-31716348
m66	chr07-27849636
m67	chr07-26918684
m69	chr07-26854290
m70	chr07-26434357
m71	chr07-26667630
m72	chr07-27219004
m73	chr07-23762540
m74	chr07-21935830
m75	chr07-23594693
m77	chr07-23774331
m78	chr07-25124971
m79	chr07-23882227
m80	chr07-21793013
m81	chr07-16757947
m82	chr07-19128919
m83	chr07-17527338
m84	chr07-17778886
m85	chr07-18426041
m86	chr07-17566442
m88	chr07-18572983
m89	chr07-19681740
m93	chr07-19407448
m94	chr07-19908155
m95	chr07-16074948
m96	chr07-14004247
m97	chr07-13388185
m107	chr07-11972102
m109	chr07-8040302
m110	chr07-7613792
m111	chr07-9361046
m112	chr07-5956101
m113	chr07-7297398
m114	chr07-3786547
m115	chr07-7723659
m116	chr07-7455146
m117	chr07-8012383
m118	chr07-5540770
m120	chr07-5965196
m121	chr07-5684834
m122	chr07-4522796
m123	chr07-4942370
m124	chr07-3327260
m127	chr07-5503442
m128	chr07-3014827
m129	chr07-3413834
m130	chr07-2716150
m134	chr07-2052023
m135	chr07-984882
m137	chr01-71935134
m138	chr01-61113958
m139	chr01-72686257
m141	chr01-75768243
m142	chr01-75341101
m150	chr01-51886430
m156	chr01-54960860
m157	chr01-53340514
m158	chr01-47555253
m161	chr01-47157364
m162	chr01-47550187
m167	chr01-44540214
m170	chr01-41414148
m171	chr01-37261925
m175	chr01-28999646
m179	chr01-27513019
m180	chr01-27066450
m182	chr01-26743928
m184	chr01-26737820
m187	chr01-26930014
m188	chr01-26789266
m190	chr01-26939355
m191	chr01-25605493
m192	chr01-25565062
m193	chr01-22435486
m194	chr01-22199462
m195	chr01-22275710
m196	chr01-21735912
m199	chr01-22168603
m201	chr01-21549839
m202	chr01-21584926
m207	chr01-5080738
m210	chr01-7137249
m212	chr01-7857114
m214	chr01-7333752
m215	chr01-7384025
m216	chr01-7050163
m217	chr01-10555546
m224	chr01-14260339
m225	chr01-17931796
m226	chr01-15038363
m227	chr09-52601337
m228	chr09-54759145
m229	chr09-54362414
m230	chr09-54462900
m231	chr09-54881416
m232	chr09-53284529
m233	chr09-52710954
m234	chr09-53208621
m235	chr09-52747622
m236	chr09-54055703
m237	chr09-53493614
m238	chr09-52296511
m241	chr09-52254664
m242	chr09-53445543
m247	chr09-48858516
m248	chr09-47566002
m249	chr09-50036573
m250	chr09-50172637
m251	chr09-50830288
m252	chr09-49620702
m253	chr09-50459621
m254	chr09-49304111
m256	chr09-49281845
m257	chr09-48128028
m258	chr09-49430161
m259	chr09-48919028
m261	chr09-47245996
m262	chr09-47066395
m263	chr09-46989406
m264	chr09-46953440
m268	chr09-45389159
m270	chr09-43677974
m271	chr09-44226433
m273	chr09-43131610
m274	chr09-42973951
m275	chr09-41499653
m276	chr09-41469259
m278	chr09-36817604
m280	chr09-35090663
m281	chr09-33899412
m282	chr09-33901178
m284	chr09-33797423
m285	chr09-33411959
m287	chr09-33013811
m288	chr09-32900270
m290	chr09-33362127
m291	chr09-32304632
m292	chr09-31832864
m295	chr09-30566616
m297	chr09-31143857
m298	chr09-30113674
m299	chr09-29156795
m301	chr09-28753180
m302	chr09-28545766
m303	chr09-28394060
m305	chr09-27995645
m306	chr09-27198853
m307	chr09-27213193
m309	chr09-24865031
m310	chr09-24401845
m313	chr09-23016422
m314	chr09-23301745
m316	chr09-23000771
m317	chr09-22140089
m328	chr09-22075046
m333	chr09-18133377
m335	chr09-18232553
m336	chr09-17394089
m342	chr09-17335130
m345	chr09-16398923
m346	chr09-17079877
m347	chr09-16106085
m348	chr09-16241115
m350	chr09-16093006
m351	chr09-15135318
m353	chr09-14055816
m355	chr09-14340531
m356	chr09-14219692
m357	chr09-14503491
m358	chr09-13495652
m359	chr09-14271726
m360	chr09-14365321
m362	chr09-14452108
m363	chr09-13528896
m364	chr09-14222639
m365	chr09-14192211
m367	chr09-13357210
m368	chr09-13342639
m370	chr09-12721471
m372	chr09-12298467
m375	chr09-12807920
m376	chr09-11321411
m379	chr09-12604350
m380	chr09-10838329
m381	chr09-10297861
m383	chr09-10597304
m387	chr09-8984611
m389	chr09-9255476
m393	chr09-8437511
m397	chr09-1462666
m398	chr09-6840398
m399	chr09-5426943
m400	chr09-364935
m402	chr09-1196208
m403	chr08-667418
m404	chr08-1529353
m407	chr08-885236
m408	chr08-3585267
m409	chr08-3169757
m411	chr08-3537087
m412	chr08-3167343
m413	chr08-1855049
m414	chr08-1861133
m415	chr08-2757832
m416	chr08-2218372
m417	chr08-4369184
m419	chr08-4107306
m421	chr08-4587655
m422	chr08-4472870
m423	chr08-4097786
m424	chr08-6141258
m426	chr08-6027295
m428	chr08-7300357
m429	chr08-6813819
m430	chr08-10755297
m431	chr08-11491133
m432	chr08-11681529
m433	chr08-12233695
m434	chr08-12804155
m437	chr08-14278944
m438	chr08-14202436
m439	chr08-20530650
m440	chr08-21691876
m442	chr08-22110611
m443	chr08-23860477
m444	chr08-22320162
m445	chr08-23835743
m446	chr08-23172704
m447	chr08-23220462
m449	chr08-28152335
m450	chr08-24485748
m453	chr08-28091542
m455	chr08-28385123
m456	chr08-25967417
m458	chr08-27933696
m460	chr08-28577552
m461	chr08-27914782
m462	chr08-29532019
m463	chr08-29707316
m464	chr08-29556125
m465	chr08-30895767
m466	chr08-31193287
m468	chr08-30846432
m470	chr08-31887113
m471	chr08-32142573
m472	chr08-31554010
m474	chr08-32376938
m475	chr08-32484755
m477	chr08-32733831
m478	chr08-32374544
m479	chr08-32997540
m480	chr08-32970844
m482	chr08-34848323
m484	chr08-33642130
m485	chr08-34753803
m487	chr08-34319235
m488	chr08-34361418
m489	chr08-34777320
m491	chr08-33684138
m492	chr08-34339574
m493	chr08-33789277
m495	chr08-34728467
m497	chr08-36785295
m499	chr08-35012782
m501	chr08-33824698
m504	chr08-46555766
m505	chr03-23636235
m508	chr03-24438111
m517	chr03-33324194
m518	chr03-33136167
m519	chr03-33545324
m520	chr03-33565505
m521	chr03-32464914
m522	chr03-36149619
m523	chr03-34589646
m524	chr03-37545313
m526	chr03-37913005
m528	chr03-36168025
m529	chr03-37548260
m530	chr03-37507832
m533	chr03-38745900
m534	chr03-38461611
m535	chr03-39725639
m536	chr03-39713615
m537	chr03-40528583
m538	chr03-40915327
m539	chr03-40512163
m541	chr03-41928088
m542	chr03-41526017
m546	chr03-41676154
m547	chr03-42387126
m550	chr03-41643261
m552	chr03-44139456
m553	chr03-41910225
m554	chr03-45070785
m555	chr03-46016008
m557	chr03-47286874
m558	chr03-46521300
m559	chr03-46459536
m560	chr03-49067159
m562	chr03-49029873
m563	chr03-49050054
m564	chr03-49182200
m565	chr03-49537717
m566	chr03-49693722
m568	chr03-49852324
m569	chr03-50902328
m570	chr03-50854599
m571	chr03-49818655
m573	chr03-52813204
m574	chr03-51342144
m576	chr03-52777697
m579	chr03-52662368
m580	chr03-52356629
m582	chr03-53700425
m584	chr03-53296289
m585	chr03-53080488
m586	chr03-53263185
m588	chr02-331447
m589	chr02-495427
m590	chr02-2349018
m591	chr02-2561823
m592	chr02-2361815
m594	chr02-2533052
m595	chr02-3395904
m596	chr02-4640854
m597	chr02-7936376
m598	chr02-6446314
m599	chr02-6274139
m600	chr02-6187371
m601	chr02-5183776
m602	chr02-8748603
m604	chr02-8043532
m605	chr02-8508670
m607	chr02-8655942
m609	chr02-7981322
m610	chr02-8684710
m611	chr02-9668644
m612	chr02-9132484
m615	chr02-9125531
m616	chr02-10805975
m617	chr02-12229950
m618	chr02-13506248
m621	chr02-14314039
m623	chr02-12799872
m624	chr02-14458384
m625	chr02-14496417
m626	chr02-13686158
m627	chr02-13834902
m628	chr02-12116138
m629	chr02-13570098
m630	chr02-13191822
m631	chr02-10982546
m635	chr02-11234361
m637	chr02-15292870
m638	chr02-14695547
m639	chr02-15082903
m641	chr02-16489022
m642	chr02-17291706
m643	chr02-15883653
m644	chr02-15792976
m645	chr02-16791022
m646	chr02-17329719
m649	chr02-17363502
m651	chr02-18434092
m652	chr02-18442820
m654	chr02-18120540
m655	chr02-19455409
m656	chr02-18495541
m657	chr02-18881961
m658	chr02-17967867
m661	chr02-19820969
m663	chr02-19068142
m664	chr02-19871843
m666	chr02-19197337
m667	chr02-19997160
m668	chr02-19987098
m669	chr02-20918314
m671	chr02-21601947
m672	chr02-22258229
m675	chr02-22758196
m676	chr02-22803379
m677	chr02-22516254
m678	chr02-22290338
m680	chr02-25166367
m681	chr02-25069939
m683	chr02-24104923
m684	chr02-25161807
m686	chr02-25119477
m688	chr02-24010796
m691	chr02-25223699
m692	chr02-25836028
m693	chr02-26078078
m694	chr02-26099069
m695	chr02-26196094
m696	chr02-27692139
m697	chr02-26786090
m698	chr02-27424168
m699	chr02-26677561
m700	chr02-27137596
m701	chr02-27390067
m706	chr02-27236978
m708	chr02-28406357
m709	chr02-28424043
m710	chr02-28326989
m711	chr02-28449642
m712	chr02-28414673
m714	chr02-28371873
m715	chr02-29391881
m716	chr02-29232359
m717	chr02-29505350
m718	chr02-29181351
m719	chr02-29524343
m721	chr02-30431847
m723	chr02-31969252
m726	chr02-31958434
m727	chr02-32299318
m728	chr02-32409595
m729	chr02-34473314
m732	chr05-55837294
m733	chr05-59002196
m735	chr05-55483815
m736	chr05-54865100
m737	chr05-53863232
m738	chr05-52794424
m740	chr05-53422421
m742	chr05-52327904
m743	chr05-53451340
m744	chr05-52944165
m745	chr05-50883482
m747	chr05-49542221
m749	chr05-50230991
m750	chr05-51421590
m753	chr05-49545227
m762	chr05-33298442
m763	chr05-31902300
m764	chr05-30970208
m765	chr05-32202091
m766	chr05-32697090
m767	chr05-30056433
m768	chr05-29632695
m769	chr05-27983405
m770	chr05-26758582
m771	chr05-27435331
m773	chr05-23364155
m774	chr05-22717739
m776	chr05-23357639
m777	chr05-24235674
m778	chr05-22434181
m779	chr05-17062309
m780	chr05-16068593
m781	chr05-16512799
m782	chr05-15367329
m783	chr05-12177379
m785	chr05-12429642
m786	chr05-10098647
m787	chr05-11233117
m788	chr05-12653121
m790	chr05-7909967
m791	chr05-9680784
m793	chr05-8287089
m794	chr05-7321417
m795	chr05-8771736
m796	chr05-7095942
m797	chr05-3772804
m798	chr05-3883790
m799	chr05-4022788
m800	chr05-3999507
m803	chr05-1762118
m804	chr05-2510222
m805	chr05-1230649
m806	chr05-3034806
m808	chr05-3480414
m810	chr04-57499689
m812	chr04-62013422
m813	chr04-62078576
m814	chr04-59034608
m815	chr04-55488514
m816	chr04-55225120
m817	chr04-55128676
m818	chr04-55244677
m820	chr04-53818475
m821	chr04-54641274
m822	chr04-54522399
m823	chr04-54206296
m824	chr04-54250528
m828	chr04-52886281
m831	chr04-51374345
m832	chr04-51052039
m834	chr04-49979419
m835	chr04-48062501
m836	chr04-50024961
m837	chr04-44727568
m838	chr04-49843855
m839	chr04-46588176
m840	chr04-43792433
m841	chr04-43576703
m842	chr04-41809632
m843	chr04-33362663
m845	chr04-28170424
m846	chr04-28174467
m847	chr10-34835612
m850	chr10-34658647
m851	chr10-35784045
m853	chr10-36193684
m854	chr10-36943446
m855	chr10-35781816
m856	chr10-33366286
m858	chr10-34315608
m859	chr10-35933210
m862	chr10-31735749
m863	chr10-31809674
m867	chr10-28688837
m868	chr10-26797372
m869	chr10-26687508
m872	chr10-25541709
m874	chr10-26165388
m875	chr10-24748242
m879	chr10-21242208
m880	chr10-23171778
m881	chr10-24142247
m882	chr10-22084611
m883	chr10-21243994
m884	chr10-20639629
m885	chr10-20325405
m888	chr10-20352018
m889	chr10-20513063
m890	chr10-17774589
m895	chr10-15723424
m897	chr10-19398873
m899	chr10-17849751
m901	chr10-14599293
m905	chr10-16608625
m909	chr10-13970674
m911	chr10-19296053
m914	chr10-13213324
m919	chr10-12368822
m921	chr10-13428188
m924	chr10-7218797
m925	chr10-7413312
m926	chr10-6137369
m927	chr06-52611883
m929	chr06-49016344
m930	chr06-51688990
m932	chr06-50705141
m933	chr06-49855949
m934	chr06-49774442
m935	chr06-50224818
m936	chr06-49783916
m937	chr06-27173929
m938	chr06-46822981
m939	chr06-46210241
m940	chr06-50163475
m942	chr06-44205686
m944	chr06-44357768
m945	chr06-43998123
m948	chr06-43772875
m949	chr06-43971270
m950	chr06-43908800
m951	chr06-43269956
m953	chr06-43476805
m956	chr06-42547455
m957	chr06-42633885
m958	chr06-42932418
m959	chr06-42258983
m961	chr06-43068327
m963	chr06-43040964
m964	chr06-42817935
m965	chr06-42447168
m967	chr06-42807652
m968	chr06-42088697
m969	chr06-41965097
m970	chr06-40771986
m971	chr06-40520670
m972	chr06-40938653
m976	chr06-39319478
m977	chr06-39535642
m978	chr06-39464537
m980	chr06-39335338
m982	chr06-39331663
m983	chr06-39923654
m984	chr06-39733581
m985	chr06-37928963
m986	chr06-36549219
m987	chr06-37249763
m988	chr06-34207851
m989	chr06-34337120
m990	chr06-39124531
m992	chr06-31154077
m993	chr06-30722657
m994	chr06-29172614
m995	chr06-30616076
m997	chr06-29844855
m998	chr06-30525446
m1001	chr06-30367895
m1002	chr06-30447258
m1004	chr06-30604633
m1005	chr06-29247608
m1006	chr06-28421157
m1007	chr06-28644956
m1009	chr06-28997492
m1012	chr06-28070229
m1014	chr06-28015542
m1017	chr06-28166977
m1018	chr06-27323315
m1019	chr06-26273380
m1020	chr06-23739772
m1021	chr06-24246186
m1023	chr06-26460502
m1025	chr06-23399804
m1026	chr06-23021594
m1027	chr06-21531222
m1029	chr06-21659258
m1030	chr06-21263137
m1032	chr06-21375362
m1035	chr06-21477198
m1036	chr06-20667147
m1038	chr06-19491032
m1039	chr06-19434797

## Sheet: map2340
m105	7.433	1
m103	15.307	1
m102	15.633	1
m97	18.73	1
m99	18.829	1
m96	18.865	1
m98	19.664	1
m87	33.489	1
m89	37.442	1
m88	38.733	1
m84	39.299	1
m83	40.186	1
m77	45.15	1
m79	47.681	1
m78	53.144	1
m76	55.062	1
m340	1.31	2
m330	1.663	2
m331	1.804	2
m332	1.962	2
m334	2.497	2
m337	4.441	2
m336	4.54	2
m338	5.621	2
m339	6.019	2
m344	7.696	2
m343	7.734	2
m342	7.772	2
m346	7.85	2
m348	8.93	2
m341	8.933	2
m351	9.415	2
m350	9.992	2
m349	10.091	2
m347	11.122	2
m353	12.076	2
m352	12.422	2
m358	12.719	2
m359	13.007	2
m362	14.04	2
m361	14.347	2
m360	14.686	2
m364	28.632	2
m365	32.917	2
m366	33.682	2
m367	35.01	2
m369	36.557	2
m275	1.931	3
m271	6.542	3
m278	14.582	3
m277	15.857	3
m276	15.993	3
m281	25.238	3
m279	26.675	3
m282	27.016	3
m287	27.051	3
m285	34.606	3
m286	34.675	3
m288	37.196	3
m299	39.956	3
m293	39.963	3
m292	40.007	3
m295	41.395	3
m297	41.711	3
m294	42.519	3
m298	42.833	3
m296	43.903	3
m302	45.852	3
m303	48.445	3
m304	49.449	3
m305	54.038	3
m311	54.688	3
m314	55.09	3
m309	55.82	3
m310	55.916	3
m307	56.282	3
m313	58.375	3
m312	58.726	3
m316	59.382	3
m319	59.696	3
m321	60.586	3
m323	61.743	3
m326	63.143	3
m320	63.276	3
m328	63.571	3
m327	64.098	3
m544	7.784	4
m545	7.82	4
m548	8.124	4
m550	10.498	4
m541	24.175	4
m537	27.174	4
m540	27.197	4
m528	27.672	4
m535	27.699	4
m539	27.896	4
m534	29.474	4
m532	30.727	4
m529	31.063	4
m515	31.188	4
m521	32.039	4
m524	32.461	4
m526	35.589	4
m517	41.085	4
m518	45.608	4
m512	49.484	4
m504	51.572	4
m510	52.801	4
m508	55.102	4
m507	55.252	4
m503	55.257	4
m513	55.422	4
m492	56.77	4
m502	59.702	4
m493	59.965	4
m494	59.974	4
m496	60.675	4
m491	60.945	4
m490	61.857	4
m501	65.482	4
m499	65.49	4
m488	67.039	4
m486	68.599	4
m487	68.624	4
m480	1.601	5
m477	1.768	5
m479	1.796	5
m473	2.451	5
m483	2.659	5
m471	2.842	5
m469	3.418	5
m476	3.696	5
m475	4.015	5
m478	4.36	5
m472	4.613	5
m467	4.757	5
m465	4.8	5
m466	4.963	5
m464	4.997	5
m461	5.57	5
m455	5.855	5
m458	5.948	5
m460	6.177	5
m456	6.744	5
m454	6.852	5
m457	6.951	5
m452	7.397	5
m453	8.266	5
m450	8.903	5
m451	8.911	5
m449	8.983	5
m447	9.537	5
m448	9.902	5
m444	10.151	5
m440	11.134	5
m443	11.451	5
m431	11.604	5
m438	11.629	5
m439	12.016	5
m437	12.079	5
m441	12.273	5
m434	12.522	5
m430	12.966	5
m429	14.201	5
m426	14.204	5
m424	14.947	5
m425	15.014	5
m421	15.123	5
m420	15.799	5
m419	16.276	5
m409	18.802	5
m410	19.32	5
m417	19.666	5
m411	20.396	5
m415	20.402	5
m413	20.868	5
m405	21.217	5
m406	21.801	5
m402	22.223	5
m401	24.095	5
m399	25.234	5
m400	25.553	5
m397	27.193	5
m394	28.811	5
m396	28.922	5
m395	29.634	5
m391	30.926	5
m389	31.66	5
m383	35.235	5
m385	35.356	5
m382	35.374	5
m381	36.688	5
m380	37.35	5
m379	37.681	5
m378	37.872	5
m376	41.07	5
m372	42.113	5
m663	0.67	6
m662	1.833	6
m644	2.123	6
m652	2.354	6
m660	2.451	6
m649	2.524	6
m657	2.866	6
m658	2.95	6
m641	3.395	6
m645	5.683	6
m653	8.21	6
m643	8.337	6
m646	8.393	6
m648	8.445	6
m642	9.012	6
m639	9.327	6
m635	10.184	6
m640	10.191	6
m636	10.301	6
m637	12.229	6
m634	12.691	6
m630	14.97	6
m626	16.352	6
m633	16.389	6
m632	17.074	6
m625	18.936	6
m627	19.755	6
m629	19.823	6
m624	19.836	6
m623	22.664	6
m622	23.416	6
m621	24.201	6
m619	24.979	6
m618	26.284	6
m616	26.289	6
m617	26.295	6
m612	29.884	6
m615	30.234	6
m613	30.329	6
m611	30.809	6
m607	32.974	6
m608	33.061	6
m606	33.536	6
m605	34.518	6
m601	35.053	6
m603	35.326	6
m600	35.418	6
m598	36.028	6
m597	38.359	6
m70	3.003	7
m72	3.256	7
m68	3.333	7
m66	3.712	7
m73	4.071	7
m65	5.71	7
m67	6.193	7
m60	6.584	7
m64	8.896	7
m61	10.501	7
m63	10.875	7
m53	14.185	7
m54	19.256	7
m52	29.687	7
m49	30.764	7
m45	38.615	7
m42	40.874	7
m41	40.992	7
m44	41.679	7
m43	42.634	7
m39	43.48	7
m38	43.519	7
m31	44.162	7
m34	44.202	7
m35	44.689	7
m30	45.112	7
m29	45.765	7
m28	45.777	7
m26	45.938	7
m25	48.827	7
m22	49.119	7
m23	49.303	7
m20	50.752	7
m24	50.943	7
m14	55.994	7
m18	56.079	7
m15	56.273	7
m17	57.002	7
m13	57.325	7
m10	58.33	7
m16	59.164	7
m5	60.182	7
m1	60.34	7
m2	60.547	7
m6	60.577	7
m4	60.812	7
m213	0.611	8
m206	1.541	8
m207	2.386	8
m209	2.435	8
m218	3.504	8
m212	4.858	8
m216	7.233	8
m215	8.071	8
m220	11.467	8
m223	11.895	8
m214	12.461	8
m219	12.703	8
m222	12.914	8
m224	13.948	8
m226	14.155	8
m229	15.785	8
m217	16.503	8
m237	17.013	8
m236	19.142	8
m230	19.765	8
m234	20.023	8
m231	20.44	8
m232	20.908	8
m240	22.274	8
m243	22.492	8
m239	22.85	8
m241	23.143	8
m246	23.98	8
m251	24.672	8
m247	24.675	8
m265	25.552	8
m248	25.602	8
m253	25.637	8
m245	25.67	8
m250	26.406	8
m249	27.367	8
m259	30.86	8
m255	30.881	8
m260	32.648	8
m261	32.674	8
m252	32.688	8
m266	34.146	8
m267	35.037	8
m268	37.191	8
m257	37.347	8
m269	38.598	8
m202	0.403	9
m200	0.781	9
m198	0.911	9
m204	1.483	9
m193	2.416	9
m189	3.077	9
m188	3.149	9
m190	3.441	9
m184	3.742	9
m187	5.139	9
m186	5.986	9
m179	6.235	9
m191	6.307	9
m180	6.641	9
m192	6.794	9
m181	7.897	9
m182	8.035	9
m196	8.445	9
m178	9.805	9
m177	10.964	9
m173	13.934	9
m171	14.064	9
m170	14.919	9
m168	15.777	9
m172	15.868	9
m169	15.981	9
m166	18.165	9
m164	19.596	9
m159	20.285	9
m160	22.731	9
m152	25.05	9
m153	26.836	9
m156	30.084	9
m151	32.541	9
m155	33.575	9
m149	33.606	9
m148	33.791	9
m150	34.43	9
m146	35.168	9
m144	35.604	9
m143	35.713	9
m145	36.497	9
m138	36.716	9
m139	37.363	9
m137	37.476	9
m135	38.6	9
m140	38.627	9
m136	38.793	9
m134	39.368	9
m133	40.685	9
m127	43.702	9
m132	45.844	9
m128	47.682	9
m129	48.101	9
m126	49.061	9
m124	50.178	9
m122	52.351	9
m123	52.829	9
m120	53.491	9
m118	53.991	9
m125	58.762	9
m121	59.295	9
m595	6.176	10
m592	6.708	10
m593	6.811	10
m588	7.214	10
m585	9.778	10
m586	11.41	10
m587	11.415	10
m577	11.723	10
m584	12.405	10
m581	12.555	10
m589	18.811	10
m579	19.56	10
m569	22.901	10
m573	26.103	10
m576	26.106	10
m574	30.82	10
m567	31.166	10
m566	32.184	10
m565	36.033	10
m563	38.178	10
m572	38.78	10
m571	42.203	10
m562	43.145	10
m561	45.636	10
m557	50.186	10
m558	52.126	10
m556	57.594	10
m555	58.201	10
m554	59.833	10

## Sheet: primary2340
sample	sire	dam	m1	m2	m4	m5	m6	m10	m13	m14	m15	m16	m17	m18	m20	m22	m23	m24	m25	m26	m28	m29	m30	m31	m34	m35	m38	m39	m41	m42	m43	m44	m45	m49	m52	m53	m54	m60	m61	m63	m64	m65	m66	m67	m68	m70	m72	m73	m76
1	-1	-1	ba	ab	ba	ba	ba	ba	ba	ab	ab	aa	aa	aa	ba	ab	ba	ba	ba	ab	aa	ba	aa	ba	aa	ba	ab	ab	ba	ba	ab	ab	ba	ab	ab	ab	ba	ab	ab	ba	ba	ab	ab	ba	ab	ba	ab	ba	aa
2	-1	-1	ab	aa	ab	ab	ab	ab	ab	ba	aa	ba	ba	ba	ab	ba	ab	ab	ab	ba	ba	ab	ba	ab	ba	ab	aa	ba	ab	ab	aa	aa	ab	aa	aa	aa	ab	aa	ba	ab	ab	aa	aa	ab	ba	ab	aa	ab	ba
3	1	2	aa	ab	ab	aa	aa	ab	ab	ab	aa	ab	ab	ab	ab	ab	ab	ab	ab	ab	ab	ab	ab	ab	ab	ab	aa	ab	ab	ab	aa	aa	ab	aa	aa	aa	ab	aa	ab	ab	ab	aa	aa	ab	ab	ab	aa	ab	ab
4	1	2	ab	aa	bb	bb	bb	bb	bb	aa	aa	aa	aa	aa	bb	aa	bb	bb	bb	aa	aa	bb	aa	bb	aa	bb	aa	aa	bb	bb	aa	aa	bb	aa	aa	aa	ab	aa	ab	ab	ab	aa	aa	ab	ab	ab	aa	ab	ab
5	1	2	ab	aa	bb	bb	bb	bb	bb	aa	aa	aa	aa	aa	bb	aa	bb	bb	bb	aa	aa	uu	aa	ab	ab	ab	ab	bb	aa	aa	ab	ab	aa	ab	ab	ab	aa	ab	bb	aa	aa	ab	ab	aa	bb	aa	ab	aa	aa
6	1	2	uu	ab	aa	ab	ab	ab	ab	ab	ab	aa	aa	aa	ab	ab	ab	ab	ab	ab	aa	ab	aa	ab	aa	ab	ab	ab	ab	ab	ab	ab	ab	ab	ab	ab	ab	ab	ab	ab	ab	ab	ab	ab	ab	ab	ab	ab	ab
7	1	2	aa	ab	uu	ab	ab	ab	ab	ab	ab	aa	aa	aa	ab	ab	ab	ab	ab	ab	aa	ab	aa	ab	aa	ab	ab	ab	ab	ab	ab	ab	ab	ab	ab	ab	aa	ab	bb	aa	aa	ab	ab	aa	bb	aa	ab	uu	aa
8	1	2	aa	ab	aa	aa	aa	aa	aa	bb	ab	ab	ab	ab	aa	bb	aa	aa	aa	bb	ab	aa	ab	aa	ab	aa	ab	bb	aa	aa	ab	ab	aa	ab	ab	ab	aa	ab	bb	aa	aa	ab	ab	aa	bb	aa	ab	aa	aa
9	1	2	ab	aa	bb	bb	bb	bb	bb	aa	aa	aa	aa	aa	bb	aa	bb	bb	bb	aa	aa	bb	aa	bb	aa	bb	aa	aa	bb	bb	aa	aa	bb	aa	aa	aa	ab	aa	ab	ab	ab	aa	aa	ab	ab	ab	aa	ab	aa
10	1	2	ab	aa	ab	ab	uu	ab	ab	ab	aa	ab	ab	ab	ab	ab	uu	ab	ab	ab	ab	ab	ab	ab	ab	ab	aa	ab	ab	ab	ab	ab	ab	ab	ab	ab	ab	ab	ab	ab	ab	ab	ab	ab	uu	ab	ab	ab	ab
11	1	2	ab	ab	ab	ab	ab	ab	ab	ab	ab	aa	aa	aa	ab	ab	ab	ab	ab	ab	aa	ab	aa	ab	aa	ab	ab	ab	ab	ab	ab	ab	ab	ab	ab	ab	aa	ab	uu	aa	aa	ab	ab	aa	bb	aa	ab	uu	aa
12	1	2	ab	aa	ab	ab	ab	ab	ab	ab	aa	ab	ab	ab	ab	ab	ab	ab	ab	ab	ab	ab	ab	ab	ab	ab	aa	ab	ab	ab	aa	aa	ab	aa	aa	aa	ab	aa	ab	ab	ab	aa	aa	ab	ab	ab	aa	ab	ab
13	1	2	ab	aa	bb	bb	uu	bb	bb	aa	aa	aa	aa	aa	bb	aa	bb	bb	bb	aa	aa	uu	aa	bb	aa	bb	aa	aa	ab	bb	aa	aa	bb	aa	aa	aa	ab	aa	ab	ab	ab	aa	aa	ab	ab	ab	aa	ab	ab
14	1	2	ab	ab	ab	ab	ab	ab	ab	ab	ab	aa	aa	aa	ab	ab	ab	ab	ab	ab	aa	ab	aa	ab	aa	ab	ab	ab	ab	ab	ab	ab	ab	ab	ab	ab	ab	ab	ab	ab	ab	ab	ab	ab	ab	ab	ab	ab	aa
15	1	2	ab	ab	ab	ab	ab	ab	ab	ab	ab	uu	uu	uu	ab	ab	ab	uu	ab	ab	uu	ab	uu	ab	uu	ab	ab	ab	ab	ab	ab	ab	ab	ab	ab	ab	ab	ab	ab	ab	ab	ab	ab	ab	ab	ab	ab	ab	ab
16	1	2	ab	aa	ab	ab	ab	aa	aa	bb	ab	ab	ab	ab	aa	bb	aa	aa	aa	bb	ab	aa	ab	aa	ab	aa	ab	bb	ab	ab	ab	ab	ab	ab	ab	ab	aa	ab	bb	aa	aa	ab	ab	aa	bb	aa	ab	aa	ab
17	1	2	ab	ab	ab	ab	ab	ab	ab	ab	ab	aa	aa	aa	ab	ab	ab	ab	ab	ab	aa	ab	aa	ab	aa	ab	ab	ab	ab	ab	ab	ab	ab	ab	ab	ab	aa	ab	uu	aa	aa	ab	ab	aa	bb	aa	ab	uu	aa
18	1	2	ab	ab	ab	ab	ab	ab	ab	ab	ab	aa	aa	aa	ab	uu	ab	ab	ab	ab	aa	ab	aa	bb	aa	ab	aa	uu	bb	uu	aa	aa	bb	aa	aa	aa	ab	aa	ab	ab	ab	aa	aa	ab	ab	ab	aa	ab	aa
19	1	2	ab	aa	ab	ab	ab	ab	ab	ab	aa	ab	ab	ab	ab	ab	ab	ab	ab	ab	ab	ab	ab	ab	ab	ab	aa	ab	ab	ab	aa	aa	ab	aa	aa	aa	ab	aa	bb	aa	aa	ab	ab	aa	bb	aa	ab	aa	aa
20	1	2	ab	ab	ab	ab	ab	ab	aa	uu	ab	ab	ab	ab	aa	bb	aa	aa	aa	bb	ab	aa	ab	aa	ab	aa	ab	bb	aa	aa	ab	ab	aa	ab	ab	ab	aa	aa	aa	bb	bb	aa	aa	bb	aa	bb	aa	bb	ab
21	1	2	aa	ab	aa	aa	aa	aa	uu	bb	ab	ab	ab	ab	aa	bb	aa	aa	aa	bb	ab	aa	ab	aa	ab	aa	ab	ab	ab	ab	aa	aa	ab	aa	aa	aa	ab	aa	ab	ab	ab	aa	aa	ab	ab	ab	aa	ab	ab
22	1	2	ab	aa	ab	ab	ab	ab	ab	ab	aa	ab	ab	ab	aa	bb	aa	aa	aa	bb	ab	aa	ab	aa	ab	aa	ab	bb	aa	aa	ab	ab	aa	ab	ab	ab	aa	ab	bb	aa	aa	ab	ab	aa	bb	aa	ab	aa	ab
23	1	2	ab	ab	ab	ab	ab	ab	ab	ab	ab	aa	aa	aa	ab	ab	ab	ab	ab	ab	aa	ab	aa	ab	aa	ab	ab	ab	ab	ab	ab	ab	ab	ab	ab	ab	ab	ab	ab	ab	ab	ab	ab	ab	ab	ab	ab	ab	ab
24	1	2	aa	ab	aa	aa	aa	aa	aa	bb	ab	ab	ab	ab	aa	bb	aa	aa	aa	bb	ab	aa	ab	aa	ab	aa	ab	bb	aa	aa	ab	ab	aa	ab	ab	aa	aa	aa	ab	ab	ab	aa	aa	ab	ab	ab	aa	ab	aa
25	1	2	ab	aa	bb	bb	bb	ab	ab	ab	ab	aa	aa	aa	ab	ab	uu	ab	ab	ab	aa	ab	aa	ab	aa	ab	ab	ab	ab	ab	ab	ab	ab	ab	ab	ab	ab	ab	ab	ab	ab	ab	ab	ab	ab	ab	ab	ab	ab
26	1	2	aa	ab	aa	aa	aa	aa	aa	bb	ab	ab	ab	ab	aa	bb	aa	aa	aa	bb	ab	aa	ab	aa	ab	aa	ab	bb	aa	aa	ab	ab	aa	ab	ab	ab	aa	ab	bb	aa	aa	ab	ab	aa	bb	aa	ab	aa	aa
27	1	2	aa	ab	aa	aa	aa	aa	aa	bb	ab	ab	ab	ab	aa	bb	aa	aa	aa	bb	ab	aa	ab	aa	ab	aa	ab	bb	aa	aa	ab	ab	aa	ab	ab	ab	aa	ab	bb	aa	aa	ab	ab	aa	bb	aa	ab	aa	aa
28	1	2	ab	aa	uu	uu	uu	ab	ab	ab	ab	aa	aa	aa	ab	ab	ab	ab	ab	ab	aa	ab	aa	ab	aa	ab	ab	ab	ab	ab	ab	ab	ab	ab	ab	ab	aa	ab	bb	uu	aa	ab	ab	uu	bb	uu	ab	aa	aa
29	1	2	ab	aa	ab	ab	ab	ab	ab	ab	aa	ab	ab	ab	ab	ab	ab	ab	ab	ab	ab	ab	ab	ab	ab	ab	aa	bb	aa	aa	ab	ab	aa	ab	ab	ab	aa	ab	ab	ab	ab	ab	ab	ab	ab	ab	ab	ab	ab
30	1	2	ab	ab	ab	ab	ab	aa	aa	bb	ab	ab	ab	ab	aa	bb	aa	uu	aa	bb	ab	aa	ab	aa	ab	aa	ab	bb	aa	aa	ab	ab	aa	ab	ab	ab	aa	ab	ab	ab	ab	ab	ab	ab	ab	ab	ab	ab	aa
31	1	2	ab	ab	ab	ab	ab	ab	ab	ab	ab	aa	aa	aa	ab	ab	ab	ab	ab	ab	aa	ab	aa	ab	aa	ab	ab	ab	ab	ab	ab	ab	ab	ab	ab	aa	ab	aa	ab	ab	ab	aa	aa	ab	ab	ab	aa	ab	ab
32	1	2	aa	ab	aa	aa	aa	aa	uu	bb	ab	ab	ab	ab	aa	bb	aa	aa	aa	bb	ab	aa	ab	aa	ab	aa	ab	bb	aa	aa	ab	ab	aa	ab	ab	ab	ab	ab	ab	ab	ab	ab	ab	ab	ab	ab	ab	ab	aa
33	1	2	ab	aa	ab	bb	bb	bb	bb	aa	aa	aa	aa	aa	bb	aa	bb	bb	uu	aa	aa	uu	aa	bb	aa	ab	aa	aa	bb	bb	aa	aa	bb	aa	aa	aa	ab	aa	ab	ab	ab	aa	aa	ab	ab	ab	aa	ab	aa
34	1	2	ab	aa	uu	uu	ab	ab	ab	ab	ab	ab	ab	ab	ab	ab	ab	ab	ab	ab	ab	ab	ab	ab	ab	ab	aa	ab	ab	ab	aa	aa	ab	aa	aa	aa	ab	aa	bb	aa	ab	ab	ab	ab	uu	ab	ab	ab	ab
35	1	2	aa	ab	ab	ab	uu	ab	ab	ab	ab	ab	ab	ab	aa	ab	aa	ab	ab	ab	aa	ab	aa	ab	aa	ab	ab	ab	ab	ab	ab	ab	ab	ab	ab	ab	uu	ab	ab	ab	ab	ab	ab	ab	ab	ab	ab	ab	ab
36	1	2	ab	aa	ab	ab	ab	ab	ab	ab	aa	ab	ab	ab	ab	ab	uu	ab	ab	ab	ab	ab	ab	ab	ab	ab	aa	ab	ab	ab	aa	aa	ab	aa	aa	aa	ab	aa	aa	uu	uu	aa	aa	bb	uu	bb	aa	bb	ab
37	1	2	ab	aa	ab	ab	ab	ab	ab	ab	aa	ab	ab	ab	ab	ab	ab	ab	ab	ab	ab	ab	ab	ab	ab	ab	aa	bb	aa	aa	ab	ab	uu	ab	ab	ab	uu	ab	bb	aa	aa	ab	ab	aa	ab	ab	ab	ab	aa
38	1	2	ab	aa	uu	bb	bb	bb	bb	aa	aa	aa	aa	aa	bb	aa	bb	bb	bb	aa	aa	ab	aa	bb	aa	ab	aa	ab	aa	aa	ab	ab	aa	ab	ab	ab	uu	ab	bb	aa	aa	ab	ab	aa	bb	aa	ab	aa	aa
39	1	2	ab	ab	ab	ab	ab	ab	ab	ab	ab	aa	aa	aa	ab	ab	ab	ab	ab	ab	aa	ab	aa	ab	aa	ab	ab	ab	ab	ab	ab	ab	ab	ab	ab	ab	aa	ab	bb	uu	aa	ab	ab	aa	bb	aa	ab	aa	aa
40	1	2	aa	ab	aa	aa	aa	aa	aa	bb	ab	ab	ab	aa	ab	ab	ab	ab	ab	ab	aa	ab	aa	ab	aa	ab	ab	ab	ab	ab	ab	ab	ab	ab	ab	ab	ab	ab	ab	ab	ab	ab	ab	ab	ab	ab	ab	ab	aa
41	1	2	uu	uu	ab	ab	ab	ab	ab	ab	uu	ab	ab	ab	ab	ab	ab	ab	ab	uu	ab	ab	ab	ab	ab	ab	uu	ab	ab	ab	uu	uu	ab	uu	uu	uu	ab	uu	ab	uu	bb	uu	uu	ab	uu	bb	uu	bb	ab
42	1	2	uu	ab	aa	aa	aa	aa	aa	bb	ab	ab	ab	ab	ab	ab	ab	ab	ab	ab	ab	ab	ab	ab	ab	ab	aa	ab	ab	ab	aa	aa	ab	aa	aa	aa	ab	aa	ab	ab	ab	aa	aa	ab	ab	ab	aa	ab	ab
43	1	2	aa	ab	aa	aa	aa	aa	aa	bb	ab	ab	ab	ab	aa	bb	aa	aa	aa	bb	ab	aa	ab	aa	ab	aa	ab	bb	aa	aa	ab	ab	aa	ab	ab	ab	ab	ab	ab	ab	ab	ab	ab	ab	ab	ab	ab	ab	aa
44	1	2	uu	ab	ab	ab	uu	ab	ab	ab	ab	ab	ab	ab	aa	uu	aa	aa	aa	bb	ab	aa	ab	uu	ab	aa	ab	bb	aa	aa	ab	ab	uu	ab	ab	ab	ab	ab	ab	ab	ab	ab	ab	ab	ab	ab	ab	ab	ab
45	1	2	ab	ab	ab	ab	ab	ab	ab	ab	ab	aa	aa	aa	ab	ab	uu	uu	ab	uu	aa	ab	aa	ab	aa	ab	ab	ab	ab	ab	ab	ab	ab	ab	ab	ab	uu	ab	ab	ab	ab	ab	ab	ab	uu	ab	aa	ab	aa
46	1	2	ab	uu	ab	uu	ab	ab	ab	ab	uu	ab	ab	ab	ab	ab	ab	ab	ab	ab	ab	ab	ab	ab	ab	ab	uu	ab	ab	ab	uu	uu	ab	uu	uu	uu	aa	uu	ab	ab	ab	uu	uu	ab	ab	ab	uu	ab	aa
47	1	2	aa	ab	aa	aa	aa	aa	aa	bb	ab	ab	ab	ab	aa	bb	aa	aa	aa	bb	ab	aa	ab	ab	ab	ab	aa	ab	ab	ab	aa	aa	ab	aa	aa	aa	ab	aa	ab	ab	ab	aa	aa	ab	ab	ab	aa	ab	aa
48	1	2	uu	ab	aa	aa	uu	aa	aa	bb	ab	ab	ab	ab	ab	ab	ab	ab	ab	ab	ab	ab	ab	ab	ab	ab	aa	ab	ab	ab	aa	aa	ab	aa	aa	aa	ab	aa	ab	ab	ab	aa	aa	ab	ab	ab	aa	ab	aa
49	1	2	uu	ab	ab	ab	ab	ab	ab	ab	ab	aa	aa	aa	ab	ab	ab	ab	ab	ab	aa	uu	aa	ab	ab	ab	ab	bb	aa	aa	ab	ab	aa	ab	ab	ab	aa	ab	uu	aa	aa	ab	ab	aa	uu	aa	ab	aa	aa
50	1	2	aa	ab	aa	aa	aa	aa	aa	bb	ab	ab	ab	ab	aa	bb	aa	aa	aa	bb	ab	aa	ab	ab	ab	ab	aa	ab	ab	ab	aa	aa	ab	aa	aa	aa	ab	aa	ab	ab	ab	aa	aa	ab	ab	ab	aa	ab	ab
51	1	2	ab	aa	ab	ab	ab	ab	ab	ab	aa	ab	ab	ab	ab	ab	ab	uu	ab	ab	ab	ab	ab	aa	ab	aa	ab	bb	uu	aa	ab	ab	aa	ab	ab	ab	ab	ab	ab	ab	ab	ab	ab	ab	ab	ab	ab	ab	aa
52	1	2	ab	ab	ab	ab	ab	ab	ab	ab	ab	aa	aa	aa	ab	ab	ab	ab	ab	ab	aa	ab	aa	ab	aa	ab	ab	bb	aa	aa	ab	ab	aa	ab	ab	ab	aa	ab	ab	ab	ab	ab	ab	ab	ab	ab	ab	ab	aa
53	1	2	ab	aa	bb	bb	bb	bb	bb	aa	aa	aa	aa	aa	bb	aa	bb	uu	uu	aa	aa	uu	aa	bb	aa	bb	aa	aa	bb	bb	aa	aa	uu	aa	aa	aa	ab	aa	bb	uu	aa	ab	ab	aa	bb	aa	ab	aa	ab
54	1	2	aa	ab	aa	aa	aa	aa	uu	bb	ab	ab	ab	ab	aa	bb	aa	aa	aa	bb	ab	aa	ab	aa	ab	aa	ab	bb	aa	aa	ab	ab	aa	ab	ab	ab	aa	ab	bb	aa	aa	ab	ab	aa	bb	aa	ab	aa	ab
55	1	2	ab	aa	ab	ab	ab	ab	ab	ab	aa	ab	ab	ab	ab	ab	ab	ab	ab	ab	ab	ab	ab	ab	ab	ab	aa	ab	ab	ab	aa	aa	ab	aa	aa	aa	ab	aa	ab	ab	ab	aa	aa	ab	ab	ab	aa	ab	ab
56	1	2	aa	ab	aa	aa	aa	aa	aa	bb	ab	ab	ab	ab	aa	bb	aa	aa	aa	bb	ab	aa	ab	aa	ab	aa	ab	bb	aa	aa	ab	ab	aa	ab	ab	ab	aa	ab	bb	aa	aa	ab	ab	uu	bb	uu	ab	aa	aa
57	1	2	ab	ab	ab	ab	ab	ab	ab	ab	ab	aa	aa	aa	ab	ab	ab	ab	ab	ab	aa	ab	aa	ab	aa	ab	ab	ab	ab	ab	ab	ab	ab	ab	ab	ab	aa	ab	bb	aa	aa	ab	ab	aa	bb	aa	ab	aa	aa
58	1	2	ab	ab	ab	ab	ab	ab	ab	ab	ab	aa	aa	aa	ab	ab	ab	ab	ab	ab	ab	ab	ab	aa	ab	aa	ab	bb	aa	aa	ab	ab	aa	ab	ab	aa	ab	aa	ab	ab	ab	aa	aa	ab	ab	ab	aa	ab	ab
59	1	2	ab	aa	ab	ab	ab	ab	ab	ab	aa	ab	ab	ab	ab	ab	uu	ab	ab	uu	ab	ab	ab	ab	ab	ab	aa	ab	ab	ab	aa	aa	ab	aa	aa	aa	ab	aa	ab	ab	ab	aa	aa	ab	ab	ab	aa	ab	ab
60	1	2	ab	ab	ab	ab	ab	ab	ab	ab	ab	aa	aa	aa	ab	ab	ab	ab	ab	ab	aa	ab	aa	ab	aa	ab	ab	ab	ab	ab	ab	ab	ab	ab	ab	ab	aa	ab	bb	aa	aa	ab	ab	aa	bb	aa	ab	aa	ab
61	1	2	ab	ab	ab	ab	ab	ab	ab	ab	ab	aa	aa	aa	ab	ab	ab	ab	ab	ab	aa	ab	aa	ab	aa	ab	ab	ab	ab	ab	ab	aa	ab	aa	aa	aa	ab	aa	ab	ab	ab	aa	aa	ab	ab	ab	aa	ab	aa
62	1	2	ab	aa	ab	uu	ab	ab	ab	ab	aa	ab	ab	ab	aa	bb	aa	aa	aa	bb	ab	uu	ab	aa	ab	uu	ab	bb	aa	aa	ab	ab	uu	ab	ab	ab	uu	ab	bb	aa	aa	ab	ab	aa	bb	aa	ab	aa	aa
63	1	2	ab	aa	bb	bb	bb	bb	bb	aa	aa	aa	aa	aa	bb	aa	bb	bb	bb	uu	aa	bb	aa	bb	aa	bb	aa	ab	ab	ab	ab	ab	ab	ab	ab	ab	aa	ab	bb	aa	aa	ab	ab	aa	bb	aa	ab	aa	ab
64	1	2	uu	ab	uu	uu	uu	aa	aa	bb	ab	ab	ab	ab	ab	uu	aa	uu	aa	uu	ab	aa	ab	aa	ab	aa	ab	bb	aa	aa	ab	ab	aa	ab	ab	ab	uu	ab	bb	uu	aa	ab	ab	aa	bb	aa	ab	aa	aa
65	1	2	ab	aa	ab	ab	ab	aa	aa	uu	ab	ab	ab	ab	uu	bb	aa	aa	aa	bb	ab	aa	ab	uu	ab	uu	ab	bb	aa	aa	ab	ab	aa	ab	ab	ab	ab	ab	ab	ab	ab	ab	ab	ab	ab	ab	ab	ab	aa
66	1	2	ab	ab	ab	ab	ab	ab	ab	ab	ab	aa	aa	aa	ab	ab	ab	ab	ab	ab	aa	ab	aa	ab	aa	ab	ab	ab	ab	ab	ab	ab	ab	ab	ab	ab	ab	ab	bb	aa	aa	ab	ab	aa	bb	aa	ab	aa	aa
67	1	2	aa	ab	aa	uu	aa	aa	uu	uu	ab	uu	uu	uu	aa	bb	uu	uu	ab	bb	uu	ab	uu	ab	uu	ab	aa	ab	ab	ab	aa	aa	ab	aa	aa	aa	ab	aa	uu	bb	uu	aa	aa	uu	uu	bb	aa	uu	aa
68	1	2	ab	ab	ab	ab	ab	ab	ab	ab	ab	aa	aa	aa	ab	ab	ab	ab	ab	ab	aa	ab	aa	ab	aa	ab	ab	ab	ab	ab	ab	ab	ab	ab	ab	aa	ab	aa	ab	ab	ab	aa	aa	ab	ab	ab	aa	ab	aa
69	1	2	ab	aa	bb	bb	bb	bb	bb	ab	aa	aa	ab	ab	ab	ab	uu	ab	ab	ab	ab	ab	ab	ab	ab	ab	aa	ab	ab	ab	aa	aa	ab	aa	aa	aa	ab	aa	ab	ab	ab	aa	aa	ab	ab	ab	aa	ab	ab
70	1	2	aa	ab	aa	aa	aa	aa	aa	bb	ab	ab	ab	ab	aa	bb	aa	aa	aa	bb	ab	aa	ab	aa	ab	aa	ab	bb	aa	aa	ab	ab	aa	ab	ab	ab	aa	ab	bb	aa	aa	ab	ab	aa	bb	aa	ab	aa	ab
71	1	2	ab	ab	ab	uu	uu	ab	ab	ab	ab	aa	aa	aa	ab	ab	ab	ab	ab	ab	aa	ab	aa	uu	aa	ab	ab	uu	uu	ab	ab	ab	ab	ab	ab	ab	aa	ab	bb	aa	uu	ab	ab	aa	uu	aa	ab	uu	aa
72	1	2	aa	ab	aa	aa	aa	aa	aa	bb	ab	ab	ab	ab	aa	bb	aa	aa	aa	bb	ab	aa	ab	aa	ab	aa	ab	bb	ab	ab	ab	ab	ab	ab	ab	ab	ab	ab	ab	ab	ab	ab	ab	ab	ab	ab	ab	ab	aa
73	1	2	ab	ab	ab	ab	ab	ab	ab	ab	ab	aa	aa	aa	ab	ab	ab	ab	ab	ab	aa	ab	aa	ab	aa	ab	ab	ab	ab	ab	ab	ab	ab	ab	ab	ab	aa	ab	bb	aa	aa	ab	ab	aa	bb	aa	ab	aa	aa
74	1	2	ab	aa	ab	ab	ab	ab	ab	ab	aa	ab	ab	ab	ab	ab	ab	ab	ab	ab	ab	ab	ab	ab	ab	ab	aa	ab	ab	ab	aa	aa	ab	aa	aa	aa	ab	aa	ab	ab	ab	aa	aa	ab	ab	ab	aa	ab	aa
75	1	2	ab	aa	ab	bb	uu	ab	ab	ab	aa	ab	ab	ab	ab	ab	ab	ab	ab	ab	ab	ab	ab	ab	ab	ab	aa	uu	uu	bb	aa	aa	uu	aa	ab	aa	ab	aa	ab	ab	ab	ab	ab	ab	ab	ab	ab	ab	ab
76	1	2	ab	aa	ab	ab	ab	ab	ab	ab	aa	ab	ab	ab	ab	ab	ab	ab	ab	ab	ab	ab	ab	ab	ab	ab	aa	ab	ab	ab	aa	aa	ab	aa	aa	aa	ab	aa	aa	bb	bb	aa	aa	bb	aa	bb	aa	bb	aa
77	1	2	ab	aa	bb	bb	bb	bb	bb	aa	aa	aa	aa	aa	bb	aa	bb	bb	bb	aa	aa	bb	aa	bb	aa	ab	aa	aa	bb	bb	aa	aa	bb	aa	aa	aa	ab	aa	ab	ab	ab	aa	aa	ab	ab	ab	aa	ab	ab
78	1	2	ab	aa	ab	ab	ab	ab	ab	ab	aa	ab	ab	ab	ab	ab	ab	ab	ab	ab	ab	ab	ab	ab	ab	ab	aa	ab	ab	ab	aa	aa	ab	aa	aa	aa	ab	ab	bb	aa	aa	ab	ab	aa	bb	aa	ab	aa	ab
79	1	2	uu	ab	aa	aa	aa	aa	aa	bb	ab	ab	ab	ab	aa	bb	aa	aa	aa	bb	ab	aa	ab	aa	ab	aa	ab	bb	ab	ab	ab	ab	ab	ab	ab	ab	aa	ab	bb	aa	aa	ab	ab	aa	bb	aa	ab	aa	aa
80	1	2	uu	aa	bb	uu	uu	uu	bb	uu	aa	aa	aa	aa	bb	ab	uu	uu	uu	uu	aa	uu	aa	bb	aa	ab	aa	aa	uu	bb	aa	aa	uu	aa	aa	aa	ab	aa	aa	uu	uu	aa	aa	bb	aa	bb	aa	ab	aa
81	1	2	ab	aa	bb	bb	bb	bb	bb	aa	aa	aa	aa	aa	bb	aa	bb	bb	bb	aa	aa	bb	aa	bb	aa	ab	aa	aa	bb	bb	aa	aa	bb	aa	aa	ab	aa	ab	bb	aa	aa	ab	ab	aa	bb	aa	ab	aa	ab
82	1	2	uu	ab	ab	ab	ab	uu	aa	uu	ab	ab	ab	ab	aa	bb	uu	uu	aa	ab	aa	ab	aa	ab	aa	ab	ab	ab	ab	ab	ab	ab	ab	ab	ab	ab	ab	ab	bb	aa	aa	ab	ab	uu	uu	uu	ab	uu	ab
83	1	2	ab	ab	ab	ab	ab	ab	ab	ab	ab	aa	aa	aa	ab	ab	ab	ab	aa	bb	ab	aa	ab	uu	ab	aa	ab	bb	aa	aa	ab	ab	aa	ab	ab	ab	aa	ab	bb	aa	aa	ab	ab	aa	bb	aa	ab	ab	aa
84	1	2	aa	ab	ab	ab	ab	ab	ab	ab	ab	aa	aa	aa	ab	ab	ab	ab	ab	ab	aa	ab	aa	ab	aa	ab	ab	ab	ab	ab	ab	ab	ab	ab	ab	ab	aa	ab	bb	aa	aa	ab	ab	aa	bb	aa	ab	aa	ab
85	1	2	ab	aa	uu	bb	bb	ab	ab	ab	ab	aa	aa	aa	ab	ab	ab	ab	ab	ab	aa	ab	aa	ab	aa	ab	ab	ab	ab	ab	ab	ab	ab	ab	ab	ab	ab	ab	ab	ab	ab	ab	ab	ab	ab	ab	ab	ab	aa
86	1	2	ab	ab	ab	ab	ab	ab	ab	ab	ab	aa	aa	aa	ab	ab	ab	ab	ab	ab	aa	ab	aa	ab	aa	ab	ab	ab	ab	ab	ab	ab	ab	ab	ab	ab	ab	ab	ab	ab	ab	ab	ab	ab	ab	ab	ab	ab	aa
87	1	2	ab	ab	ab	ab	ab	ab	ab	ab	ab	aa	aa	aa	ab	ab	ab	ab	ab	ab	aa	uu	aa	ab	aa	ab	ab	ab	ab	ab	ab	ab	ab	ab	ab	ab	ab	ab	ab	ab	ab	ab	ab	ab	ab	ab	ab	ab	ab
88	1	2	ab	ab	ab	ab	ab	ab	ab	ab	ab	aa	aa	aa	ab	ab	ab	ab	ab	ab	aa	ab	aa	ab	aa	ab	ab	ab	ab	ab	ab	ab	ab	ab	ab	ab	aa	ab	bb	aa	aa	ab	ab	uu	bb	aa	ab	aa	ab
89	1	2	aa	ab	uu	aa	aa	ab	ab	ab	aa	ab	ab	ab	ab	ab	ab	ab	ab	ab	ab	ab	ab	ab	ab	ab	aa	ab	ab	ab	aa	aa	ab	aa	aa	aa	ab	aa	ab	ab	ab	aa	aa	ab	ab	ab	aa	ab	ab
90	1	2	aa	ab	aa	uu	aa	aa	aa	bb	ab	ab	ab	ab	aa	bb	aa	aa	aa	bb	ab	aa	ab	aa	ab	aa	ab	bb	aa	aa	ab	ab	aa	ab	ab	ab	aa	ab	bb	aa	aa	ab	ab	aa	bb	aa	ab	aa	ab
91	1	2	uu	aa	ab	ab	ab	ab	ab	ab	aa	ab	ab	ab	ab	ab	ab	ab	ab	ab	ab	ab	ab	ab	ab	ab	aa	ab	ab	ab	aa	aa	ab	aa	aa	aa	ab	aa	ab	ab	ab	aa	aa	ab	ab	ab	aa	ab	aa
92	1	2	ab	aa	ab	ab	ab	ab	ab	ab	aa	ab	ab	ab	ab	ab	ab	ab	ab	ab	ab	ab	ab	ab	ab	ab	aa	ab	ab	ab	aa	aa	ab	aa	aa	aa	ab	aa	bb	aa	aa	ab	ab	aa	bb	aa	ab	aa	ab
93	1	2	ab	ab	ab	ab	ab	ab	ab	ab	ab	aa	aa	aa	ab	ab	ab	ab	ab	ab	aa	ab	aa	ab	aa	ab	ab	ab	ab	ab	ab	ab	ab	ab	ab	ab	ab	ab	ab	ab	ab	ab	ab	ab	ab	ab	ab	ab	aa
94	1	2	ab	aa	ab	ab	ab	ab	ab	ab	aa	ab	ab	ab	ab	ab	ab	ab	ab	ab	ab	ab	ab	ab	ab	ab	aa	ab	ab	ab	aa	aa	ab	aa	aa	ab	aa	ab	bb	uu	aa	ab	ab	aa	uu	aa	ab	aa	aa
95	1	2	aa	ab	aa	aa	aa	aa	aa	bb	ab	ab	ab	ab	aa	bb	aa	aa	uu	bb	ab	aa	ab	aa	ab	aa	ab	bb	aa	aa	ab	ab	aa	ab	ab	ab	aa	ab	ab	ab	ab	aa	aa	ab	ab	ab	aa	ab	aa
96	1	2	aa	uu	aa	uu	aa	ab	ab	ab	uu	ab	ab	ab	ab	ab	ab	ab	uu	ab	ab	ab	ab	uu	ab	ab	uu	ab	ab	ab	uu	uu	ab	uu	uu	uu	ab	uu	ab	ab	ab	uu	uu	ab	ab	ab	uu	uu	aa
97	1	2	ab	ab	ab	ab	ab	ab	ab	ab	ab	aa	aa	aa	ab	ab	ab	ab	ab	ab	aa	ab	ab	aa	ab	aa	ab	bb	aa	aa	ab	ab	aa	ab	ab	ab	ab	ab	ab	ab	ab	ab	ab	ab	ab	ab	ab	ab	ab
98	1	2	ab	ab	ab	ab	ab	ab	ab	ab	ab	aa	aa	aa	ab	ab	ab	ab	ab	ab	aa	ab	aa	ab	aa	ab	ab	ab	ab	ab	ab	ab	ab	ab	ab	ab	ab	ab	ab	ab	ab	ab	ab	ab	ab	ab	ab	ab	ab
99	1	2	ab	ab	ab	ab	ab	ab	ab	ab	ab	aa	aa	aa	ab	ab	ab	ab	ab	ab	aa	ab	aa	ab	aa	ab	ab	ab	ab	ab	ab	ab	ab	ab	ab	ab	ab	ab	ab	ab	ab	ab	ab	ab	ab	ab	ab	ab	ab
100	1	2	aa	ab	aa	aa	aa	aa	aa	bb	ab	ab	ab	ab	aa	bb	aa	aa	aa	bb	ab	aa	ab	aa	ab	aa	ab	bb	uu	aa	ab	ab	aa	ab	ab	ab	ab	ab	ab	ab	ab	ab	ab	ab	ab	ab	ab	ab	ab
101	1	2	ab	ab	ab	ab	ab	ab	ab	ab	ab	aa	aa	aa	ab	ab	ab	ab	ab	ab	aa	ab	aa	ab	aa	ab	ab	ab	ab	ab	ab	ab	ab	ab	ab	aa	ab	aa	ab	ab	ab	aa	aa	ab	ab	ab	aa	ab	aa
102	1	2	aa	ab	aa	aa	uu	aa	aa	bb	ab	ab	ab	ab	aa	bb	aa	uu	uu	ab	ab	ab	ab	ab	ab	ab	aa	ab	ab	ab	aa	aa	ab	aa	aa	aa	ab	aa	ab	ab	ab	aa	aa	ab	ab	ab	aa	ab	aa
103	1	2	ab	aa	ab	ab	ab	aa	aa	bb	ab	ab	ab	ab	aa	ab	ab	aa	ab	ab	aa	ab	aa	ab	aa	ab	ab	ab	ab	ab	ab	ab	ab	ab	ab	ab	aa	ab	bb	aa	aa	ab	ab	aa	bb	aa	ab	aa	ab
104	1	2	ab	aa	ab	ab	ab	ab	ab	ab	aa	ab	ab	ab	aa	bb	aa	aa	aa	bb	ab	aa	ab	aa	ab	aa	ab	bb	aa	aa	ab	ab	aa	ab	ab	ab	aa	ab	bb	aa	aa	ab	ab	aa	bb	aa	ab	aa	aa
105	1	2	aa	ab	aa	aa	aa	aa	aa	bb	ab	ab	ab	ab	aa	bb	aa	aa	aa	bb	ab	aa	ab	aa	ab	aa	ab	bb	aa	aa	ab	ab	aa	ab	ab	ab	aa	ab	bb	aa	aa	ab	ab	aa	bb	aa	ab	aa	ab
106	1	2	ab	aa	ab	ab	ab	ab	ab	ab	aa	ab	ab	ab	ab	ab	ab	ab	ab	ab	ab	ab	ab	ab	ab	ab	aa	ab	ab	ab	aa	aa	ab	aa	aa	aa	ab	aa	ab	ab	ab	aa	aa	ab	ab	ab	aa	ab	aa
107	1	2	uu	ab	uu	uu	aa	aa	aa	bb	ab	ab	ab	ab	aa	bb	uu	uu	aa	uu	ab	aa	ab	aa	ab	uu	ab	bb	aa	aa	ab	ab	aa	ab	ab	ab	aa	ab	uu	uu	aa	ab	ab	aa	bb	uu	ab	aa	ab
108	1	2	aa	ab	aa	aa	aa	aa	aa	bb	ab	ab	ab	ab	aa	bb	uu	aa	aa	bb	ab	aa	ab	aa	ab	aa	ab	bb	aa	aa	ab	ab	aa	ab	ab	ab	aa	ab	bb	aa	aa	ab	ab	aa	bb	aa	ab	aa	aa
109	1	2	ab	ab	ab	ab	ab	ab	ab	ab	ab	aa	aa	aa	ab	ab	ab	ab	ab	ab	aa	ab	aa	ab	aa	ab	ab	ab	ab	ab	ab	ab	ab	ab	ab	ab	aa	ab	bb	aa	aa	ab	ab	aa	bb	aa	ab	aa	ab
110	1	2	ab	ab	ab	ab	uu	ab	ab	ab	ab	aa	aa	aa	ab	uu	ab	ab	ab	ab	aa	ab	aa	ab	ab	ab	ab	ab	uu	aa	ab	ab	aa	ab	ab	ab	aa	ab	uu	aa	aa	ab	ab	aa	bb	aa	ab	aa	aa
111	1	2	aa	ab	aa	aa	aa	aa	aa	bb	ab	ab	ab	ab	aa	bb	aa	aa	aa	bb	ab	aa	ab	aa	ab	aa	ab	bb	aa	aa	ab	ab	aa	ab	ab	ab	aa	ab	bb	aa	aa	ab	ab	aa	bb	aa	ab	aa	aa
112	1	2	uu	ab	uu	uu	uu	aa	aa	bb	ab	ab	ab	ab	aa	bb	uu	aa	uu	bb	ab	uu	ab	aa	ab	aa	ab	bb	ab	ab	ab	ab	ab	ab	ab	ab	ab	ab	ab	ab	ab	ab	ab	uu	ab	ab	ab	ab	ab
113	1	2	ab	aa	ab	uu	ab	ab	ab	ab	aa	ab	ab	ab	ab	ab	ab	ab	ab	ab	ab	ab	ab	ab	ab	ab	aa	ab	ab	ab	aa	aa	ab	aa	aa	aa	ab	aa	ab	ab	ab	aa	aa	uu	uu	ab	aa	ab	aa
114	1	2	ab	aa	ab	ab	ab	ab	ab	ab	aa	ab	ab	ab	ab	ab	ab	ab	ab	ab	ab	ab	aa	ab	aa	ab	ab	ab	ab	ab	ab	ab	ab	ab	ab	ab	ab	ab	ab	ab	ab	ab	ab	ab	ab	ab	ab	ab	ab
115	1	2	ab	aa	ab	ab	ab	ab	ab	ab	aa	ab	ab	ab	ab	ab	ab	ab	ab	ab	ab	ab	ab	ab	ab	ab	aa	ab	uu	bb	aa	aa	bb	aa	aa	aa	ab	aa	aa	bb	bb	aa	aa	bb	aa	bb	aa	bb	aa
116	1	2	ab	aa	ab	ab	ab	ab	ab	ab	aa	ab	ab	ab	ab	ab	ab	ab	ab	ab	ab	ab	ab	ab	ab	ab	aa	ab	ab	ab	aa	aa	ab	aa	aa	aa	ab	ab	bb	aa	aa	ab	ab	aa	bb	aa	ab	aa	aa
117	1	2	aa	ab	aa	aa	aa	aa	aa	bb	ab	ab	ab	ab	aa	bb	aa	aa	aa	bb	ab	aa	ab	aa	ab	aa	ab	bb	aa	aa	ab	ab	aa	ab	ab	ab	ab	ab	ab	ab	ab	ab	ab	ab	uu	ab	ab	ab	aa
118	1	2	ab	aa	ab	ab	ab	ab	ab	ab	aa	ab	ab	ab	ab	ab	ab	ab	ab	ab	ab	ab	ab	ab	ab	ab	aa	bb	aa	aa	ab	ab	aa	ab	ab	ab	ab	ab	ab	ab	ab	ab	ab	ab	ab	ab	ab	ab	aa
119	1	2	ab	ab	ab	ab	ab	ab	ab	ab	ab	aa	aa	aa	ab	ab	ab	ab	ab	ab	aa	ab	aa	ab	aa	ab	ab	ab	ab	ab	ab	ab	ab	ab	ab	ab	aa	ab	bb	aa	aa	ab	ab	aa	bb	aa	ab	aa	aa
120	1	2	ab	aa	ab	ab	ab	ab	ab	ab	aa	ab	ab	ab	ab	uu	ab	ab	ab	ab	ab	ab	ab	ab	ab	ab	aa	ab	ab	ab	aa	aa	ab	aa	aa	aa	ab	aa	ab	ab	ab	aa	aa	ab	ab	ab	aa	ab	ab
121	1	2	aa	ab	aa	aa	aa	aa	aa	bb	ab	ab	ab	ab	aa	bb	aa	aa	aa	bb	ab	aa	ab	aa	ab	aa	ab	bb	aa	aa	ab	ab	aa	ab	ab	aa	ab	aa	ab	ab	ab	aa	aa	ab	ab	ab	aa	ab	aa
122	1	2	aa	ab	aa	aa	aa	aa	aa	bb	ab	ab	ab	ab	aa	bb	aa	aa	aa	bb	ab	aa	ab	aa	ab	aa	ab	bb	aa	aa	ab	ab	aa	ab	ab	ab	aa	ab	uu	aa	aa	ab	ab	aa	bb	aa	ab	aa	aa
123	1	2	aa	ab	aa	aa	aa	aa	aa	bb	ab	ab	ab	ab	aa	bb	aa	aa	aa	bb	ab	aa	ab	aa	ab	uu	ab	bb	aa	aa	ab	ab	aa	ab	ab	aa	ab	aa	ab	ab	ab	aa	aa	ab	ab	ab	aa	ab	aa
124	1	2	aa	ab	aa	aa	aa	aa	aa	bb	ab	ab	ab	ab	aa	bb	aa	uu	aa	bb	ab	aa	ab	aa	ab	aa	ab	bb	aa	aa	ab	ab	aa	ab	ab	ab	aa	ab	bb	aa	aa	ab	ab	aa	bb	aa	ab	aa	aa
125	1	2	aa	ab	aa	aa	aa	aa	aa	bb	ab	ab	ab	ab	aa	bb	aa	aa	aa	bb	ab	aa	ab	aa	ab	aa	ab	bb	aa	aa	ab	ab	aa	ab	ab	ab	uu	ab	bb	uu	aa	ab	ab	uu	uu	aa	ab	uu	ab
126	1	2	ab	aa	bb	bb	bb	bb	bb	aa	aa	aa	aa	aa	bb	aa	bb	bb	bb	aa	aa	uu	aa	bb	aa	ab	aa	ab	ab	ab	ab	ab	ab	ab	ab	ab	ab	ab	bb	aa	aa	ab	ab	aa	bb	aa	ab	aa	ab
127	1	2	ab	ab	ab	ab	ab	ab	ab	ab	ab	aa	aa	aa	ab	ab	ab	ab	ab	ab	aa	ab	aa	ab	aa	ab	ab	ab	ab	ab	ab	ab	ab	ab	ab	ab	ab	ab	ab	ab	ab	ab	ab	ab	ab	ab	ab	ab	ab
128	1	2	uu	ab	aa	uu	aa	aa	aa	uu	ab	ab	ab	ab	uu	bb	ab	uu	ab	uu	ab	ab	ab	aa	ab	ab	ab	ab	uu	aa	ab	ab	uu	ab	ab	ab	ab	ab	bb	uu	ab	ab	ab	aa	bb	aa	ab	aa	ab
129	1	2	ab	aa	ab	ab	ab	ab	ab	ab	aa	ab	ab	ab	ab	ab	ab	ab	ab	ab	ab	ab	ab	ab	ab	ab	aa	ab	ab	ab	aa	aa	ab	aa	aa	aa	ab	aa	ab	ab	ab	ab	ab	aa	bb	aa	ab	aa	aa
130	1	2	aa	ab	uu	aa	aa	aa	aa	bb	ab	ab	ab	ab	aa	bb	aa	aa	uu	uu	ab	aa	ab	aa	ab	aa	ab	bb	aa	aa	ab	ab	aa	ab	ab	ab	aa	ab	uu	uu	aa	ab	ab	aa	bb	aa	ab	aa	aa
131	1	2	ab	aa	ab	ab	ab	ab	ab	ab	aa	ab	ab	ab	ab	ab	ab	ab	ab	ab	ab	ab	ab	ab	ab	ab	aa	ab	aa	aa	aa	aa	aa	ab	ab	ab	aa	ab	bb	aa	aa	ab	ab	aa	bb	aa	ab	aa	aa
132	1	2	ab	aa	ab	ab	ab	ab	ab	ab	aa	ab	ab	ab	ab	ab	ab	ab	uu	ab	ab	ab	ab	ab	ab	ab	aa	ab	ab	ab	aa	aa	uu	aa	aa	aa	ab	aa	ab	ab	ab	aa	aa	ab	ab	ab	aa	ab	ab
133	1	2	aa	ab	uu	aa	aa	aa	aa	bb	ab	ab	ab	ab	aa	bb	uu	aa	uu	bb	ab	aa	ab	uu	ab	aa	ab	bb	aa	aa	ab	ab	aa	ab	ab	ab	uu	ab	bb	aa	aa	ab	ab	uu	uu	aa	ab	aa	ab
134	1	2	ab	aa	bb	bb	bb	ab	ab	ab	aa	ab	ab	ab	ab	ab	ab	ab	ab	ab	ab	ab	ab	ab	ab	ab	aa	ab	ab	ab	aa	aa	ab	aa	aa	aa	ab	aa	ab	ab	ab	aa	aa	ab	ab	ab	aa	ab	aa
135	1	2	ab	ab	ab	ab	ab	ab	ab	ab	ab	aa	aa	aa	ab	ab	ab	ab	ab	ab	aa	ab	aa	ab	aa	ab	ab	ab	ab	ab	ab	ab	ab	ab	ab	ab	aa	ab	ab	ab	ab	aa	aa	ab	ab	ab	aa	ab	ab
136	1	2	ab	aa	ab	ab	ab	ab	ab	ab	aa	ab	ab	ab	ab	ab	ab	ab	ab	ab	ab	ab	ab	ab	ab	ab	aa	ab	ab	ab	aa	aa	ab	aa	aa	ab	aa	ab	bb	aa	aa	ab	ab	aa	bb	aa	ab	aa	aa
137	1	2	ab	ab	ab	ab	ab	ab	ab	ab	ab	aa	aa	aa	ab	ab	ab	ab	ab	ab	aa	ab	aa	ab	aa	ab	ab	ab	ab	ab	ab	ab	ab	ab	ab	ab	uu	ab	bb	aa	aa	ab	ab	aa	uu	aa	ab	aa	aa
138	1	2	ab	aa	bb	bb	bb	ab	bb	aa	aa	aa	aa	aa	uu	aa	bb	bb	uu	uu	aa	bb	aa	bb	aa	bb	aa	aa	bb	bb	aa	aa	ab	ab	ab	aa	ab	aa	ab	ab	ab	aa	aa	ab	ab	ab	aa	ab	ab
139	1	2	ab	aa	uu	bb	bb	bb	bb	aa	aa	aa	aa	aa	bb	aa	bb	bb	bb	aa	aa	uu	aa	bb	aa	bb	aa	aa	bb	bb	aa	aa	bb	aa	aa	aa	ab	aa	ab	ab	ab	aa	aa	ab	ab	ab	aa	ab	aa
140	1	2	ab	aa	bb	bb	bb	bb	bb	aa	aa	aa	aa	aa	bb	aa	bb	bb	bb	aa	aa	bb	aa	bb	aa	ab	aa	aa	bb	bb	aa	aa	bb	aa	aa	aa	ab	ab	bb	aa	aa	ab	ab	aa	bb	aa	ab	aa	aa
141	1	2	aa	ab	aa	aa	aa	aa	aa	bb	ab	ab	ab	ab	aa	bb	aa	aa	aa	uu	ab	aa	ab	aa	ab	aa	ab	bb	aa	uu	ab	ab	aa	ab	ab	ab	ab	ab	ab	ab	ab	ab	ab	ab	ab	ab	ab	ab	aa
142	1	2	aa	ab	aa	aa	aa	aa	aa	bb	ab	ab	ab	ab	aa	bb	aa	aa	aa	bb	ab	aa	ab	aa	ab	aa	ab	bb	aa	aa	ab	ab	aa	ab	ab	ab	aa	aa	ab	ab	ab	aa	aa	ab	ab	ab	aa	ab	aa
143	1	2	uu	ab	uu	aa	aa	aa	aa	bb	ab	ab	ab	ab	aa	bb	aa	aa	uu	bb	ab	uu	ab	uu	ab	aa	ab	bb	aa	aa	ab	ab	aa	ab	ab	ab	aa	aa	bb	aa	aa	aa	aa	ab	ab	ab	aa	ab	aa
144	1	2	aa	aa	ab	ab	ab	ab	ab	ab	aa	ab	ab	ab	ab	ab	ab	ab	ab	ab	ab	ab	ab	ab	ab	ab	aa	ab	ab	ab	aa	aa	ab	aa	aa	aa	ab	aa	ab	ab	ab	aa	aa	ab	ab	ab	aa	ab	ab
145	1	2	ab	ab	ab	ab	ab	ab	ab	ab	ab	aa	aa	aa	ab	ab	ab	ab	ab	ab	aa	ab	aa	ab	aa	ab	ab	ab	ab	ab	ab	ab	ab	ab	ab	aa	ab	aa	ab	ab	ab	aa	aa	ab	ab	ab	aa	ab	aa
146	1	2	aa	ab	aa	aa	aa	aa	aa	bb	ab	ab	ab	ab	aa	bb	aa	aa	uu	bb	ab	aa	ab	aa	ab	aa	ab	ab	ab	ab	aa	aa	ab	aa	aa	aa	ab	aa	ab	ab	ab	aa	aa	ab	ab	ab	aa	ab	ab
147	1	2	ab	ab	ab	ab	ab	ab	ab	ab	ab	aa	aa	aa	ab	ab	ab	ab	ab	ab	aa	ab	aa	ab	aa	ab	ab	ab	ab	ab	ab	ab	ab	ab	ab	ab	ab	ab	ab	ab	ab	ab	ab	ab	ab	ab	ab	ab	ab
148	1	2	aa	aa	ab	ab	ab	aa	aa	bb	ab	ab	ab	ab	aa	bb	aa	aa	aa	bb	ab	aa	ab	aa	ab	aa	ab	bb	aa	aa	ab	ab	aa	ab	ab	ab	aa	ab	bb	aa	aa	ab	ab	aa	bb	aa	ab	aa	ab
149	1	2	aa	ab	uu	aa	aa	aa	ab	ab	aa	ab	ab	ab	ab	ab	ab	ab	ab	ab	ab	ab	ab	ab	ab	ab	aa	ab	ab	ab	aa	aa	ab	aa	aa	aa	ab	aa	ab	ab	ab	aa	aa	ab	ab	ab	aa	ab	aa
150	1	2	ab	ab	ab	ab	ab	ab	ab	ab	ab	aa	aa	aa	ab	ab	ab	ab	ab	ab	aa	ab	aa	ab	aa	ab	ab	ab	aa	aa	ab	ab	aa	ab	ab	ab	aa	ab	bb	aa	aa	ab	ab	aa	bb	aa	ab	aa	ab
151	1	2	ab	aa	bb	bb	bb	bb	bb	aa	aa	aa	aa	aa	bb	aa	bb	bb	bb	aa	aa	bb	aa	bb	aa	ab	aa	aa	bb	bb	aa	aa	bb	aa	aa	aa	ab	aa	ab	ab	ab	aa	aa	ab	ab	ab	aa	ab	aa
152	1	2	aa	ab	aa	aa	aa	aa	aa	bb	ab	ab	ab	ab	aa	bb	aa	aa	aa	bb	ab	aa	ab	aa	ab	aa	ab	bb	aa	aa	ab	ab	aa	ab	ab	aa	ab	aa	ab	ab	ab	aa	aa	ab	ab	ab	aa	ab	ab
153	1	2	ab	ab	ab	ab	ab	ab	ab	ab	ab	aa	aa	aa	ab	ab	ab	ab	ab	ab	aa	ab	aa	ab	aa	ab	ab	ab	ab	ab	ab	ab	ab	ab	ab	ab	ab	ab	ab	ab	ab	ab	ab	ab	ab	ab	ab	ab	ab
154	1	2	ab	aa	ab	ab	ab	ab	ab	ab	aa	ab	ab	ab	ab	ab	ab	ab	ab	ab	ab	ab	ab	ab	ab	ab	aa	bb	ab	ab	ab	ab	ab	ab	ab	ab	aa	ab	bb	aa	aa	ab	ab	aa	bb	aa	ab	aa	ab
155	1	2	aa	ab	aa	aa	aa	aa	aa	bb	ab	ab	ab	ab	aa	bb	aa	aa	aa	bb	ab	aa	ab	aa	ab	aa	ab	bb	aa	aa	ab	ab	aa	ab	ab	ab	aa	ab	bb	aa	aa	ab	ab	aa	bb	aa	ab	aa	ab
156	1	2	ab	aa	ab	uu	ab	aa	aa	bb	ab	ab	ab	ab	aa	bb	aa	aa	aa	bb	ab	aa	ab	aa	ab	aa	ab	bb	ab	ab	ab	ab	ab	ab	ab	ab	aa	ab	bb	aa	aa	ab	ab	aa	bb	aa	ab	aa	ab
157	1	2	aa	ab	ab	ab	ab	ab	ab	ab	ab	aa	aa	aa	ab	ab	ab	ab	ab	ab	aa	ab	aa	ab	aa	ab	ab	ab	ab	ab	ab	ab	ab	ab	ab	ab	ab	ab	ab	ab	ab	ab	ab	ab	ab	ab	ab	ab	aa
158	1	2	aa	ab	aa	aa	aa	aa	aa	bb	ab	ab	ab	ab	aa	bb	aa	aa	aa	bb	ab	aa	ab	aa	ab	aa	ab	bb	aa	aa	ab	ab	aa	ab	ab	ab	aa	ab	bb	aa	aa	ab	ab	aa	bb	aa	ab	aa	aa
159	1	2	ab	uu	ab	ab	ab	ab	ab	ab	uu	ab	ab	ab	ab	ab	ab	ab	ab	ab	ab	ab	ab	ab	ab	ab	uu	ab	ab	ab	uu	uu	ab	uu	uu	uu	ab	uu	ab	ab	ab	uu	uu	ab	ab	ab	uu	uu	ab
160	1	2	uu	ab	ab	aa	ab	ab	uu	uu	ab	ab	ab	ab	ab	ab	ab	aa	ab	bb	ab	ab	ab	uu	ab	ab	ab	uu	aa	uu	ab	ab	uu	ab	ab	ab	aa	ab	ab	uu	ab	ab	ab	ab	ab	ab	ab	uu	ab
161	1	2	aa	aa	ab	ab	ab	ab	ab	ab	aa	ab	ab	ab	aa	bb	aa	aa	uu	bb	ab	aa	ab	uu	ab	aa	ab	bb	ab	ab	ab	ab	ab	ab	ab	ab	ab	ab	ab	ab	ab	ab	ab	ab	ab	ab	ab	ab	aa
162	1	2	ab	ab	ab	ab	ab	ab	bb	aa	aa	aa	aa	aa	bb	aa	bb	bb	bb	aa	aa	bb	aa	bb	aa	ab	aa	aa	bb	bb	aa	aa	bb	aa	aa	aa	ab	aa	ab	ab	ab	aa	aa	ab	ab	ab	aa	ab	aa
163	1	2	ab	ab	ab	ab	ab	ab	ab	ab	ab	aa	aa	aa	ab	ab	ab	ab	ab	ab	aa	ab	aa	ab	aa	ab	ab	ab	ab	ab	ab	ab	ab	ab	ab	ab	ab	ab	ab	ab	ab	ab	ab	ab	ab	ab	ab	ab	aa
164	1	2	aa	ab	aa	aa	aa	aa	aa	bb	ab	ab	ab	ab	aa	bb	aa	aa	aa	bb	ab	aa	ab	aa	ab	aa	ab	bb	aa	aa	ab	ab	aa	ab	ab	ab	uu	ab	bb	aa	aa	ab	ab	aa	bb	aa	ab	aa	ab
165	1	2	ab	aa	ab	ab	ab	ab	ab	ab	aa	ab	ab	ab	ab	ab	ab	ab	ab	ab	ab	ab	ab	ab	ab	ab	aa	ab	ab	ab	aa	aa	ab	aa	aa	aa	ab	aa	ab	ab	bb	aa	aa	bb	aa	bb	aa	bb	aa
166	1	2	aa	ab	uu	uu	aa	aa	aa	bb	ab	ab	ab	ab	aa	bb	aa	aa	aa	uu	ab	aa	ab	aa	ab	aa	ab	uu	aa	aa	ab	ab	uu	ab	ab	ab	aa	ab	bb	aa	uu	ab	ab	aa	bb	aa	ab	aa	ab
167	1	2	aa	ab	aa	aa	uu	aa	ab	ab	aa	ab	ab	ab	ab	ab	ab	ab	ab	ab	ab	ab	ab	ab	ab	ab	aa	ab	ab	ab	aa	aa	ab	aa	aa	aa	ab	aa	ab	ab	ab	aa	aa	ab	ab	ab	aa	ab	ab
168	1	2	ab	ab	ab	ab	ab	ab	ab	ab	ab	aa	aa	aa	ab	ab	ab	ab	ab	aa	aa	bb	aa	bb	aa	bb	aa	aa	bb	bb	aa	aa	bb	aa	aa	aa	ab	aa	ab	ab	ab	aa	aa	ab	ab	ab	aa	ab	ab
169	1	2	ab	aa	bb	bb	bb	bb	bb	aa	aa	aa	aa	aa	bb	aa	bb	bb	bb	aa	aa	bb	aa	bb	aa	bb	aa	ab	ab	ab	aa	aa	ab	aa	aa	aa	ab	aa	ab	ab	ab	aa	aa	bb	aa	bb	aa	bb	aa
170	1	2	ab	ab	ab	ab	ab	ab	ab	ab	ab	aa	aa	aa	ab	ab	ab	ab	ab	ab	aa	ab	aa	ab	aa	ab	ab	ab	ab	ab	ab	ab	ab	ab	ab	ab	ab	ab	ab	ab	ab	ab	ab	ab	ab	ab	ab	ab	ab
171	1	2	ab	ab	ab	ab	ab	ab	ab	ab	ab	aa	aa	aa	ab	ab	ab	ab	ab	ab	aa	ab	aa	ab	aa	ab	ab	ab	ab	ab	ab	ab	ab	ab	ab	ab	ab	ab	ab	ab	ab	ab	ab	ab	ab	ab	ab	ab	ab
172	1	2	ab	aa	ab	ab	ab	ab	ab	ab	aa	ab	ab	ab	ab	ab	ab	ab	ab	ab	ab	ab	ab	ab	ab	ab	aa	ab	bb	bb	aa	aa	bb	aa	aa	aa	ab	aa	uu	bb	bb	aa	aa	bb	aa	bb	aa	bb	ab
173	1	2	ab	aa	ab	ab	ab	ab	ab	ab	aa	ab	ab	ab	ab	ab	ab	ab	ab	ab	ab	ab	ab	ab	ab	ab	aa	ab	ab	uu	aa	aa	bb	aa	aa	ab	ab	ab	ab	ab	ab	ab	ab	ab	ab	ab	ab	ab	aa
174	1	2	uu	ab	ab	ab	ab	ab	ab	ab	ab	aa	aa	ab	ab	ab	ab	ab	ab	ab	ab	ab	ab	ab	ab	ab	ab	ab	ab	ab	ab	ab	ab	ab	ab	ab	aa	ab	bb	aa	aa	ab	ab	aa	bb	aa	ab	aa	ab
175	1	2	ab	aa	uu	bb	bb	bb	bb	aa	aa	aa	aa	aa	ab	ab	ab	ab	ab	ab	aa	ab	aa	ab	aa	ab	ab	ab	ab	ab	ab	ab	ab	ab	ab	ab	aa	ab	bb	aa	aa	ab	ab	aa	bb	aa	ab	aa	ab
176	1	2	ab	aa	ab	ab	ab	ab	ab	ab	aa	ab	ab	ab	ab	ab	ab	ab	ab	ab	ab	ab	ab	ab	ab	ab	aa	ab	ab	ab	aa	aa	ab	aa	aa	ab	aa	ab	bb	aa	aa	ab	ab	aa	bb	aa	ab	aa	aa
177	1	2	ab	ab	ab	ab	ab	ab	ab	ab	ab	aa	aa	aa	ab	ab	ab	ab	ab	ab	aa	ab	aa	ab	aa	ab	ab	ab	ab	ab	ab	ab	ab	ab	ab	ab	aa	ab	bb	aa	aa	ab	ab	aa	bb	aa	ab	uu	ab
178	1	2	ab	ab	ab	ab	ab	ab	ab	ab	ab	aa	aa	aa	ab	ab	ab	ab	ab	ab	aa	ab	aa	ab	aa	ab	ab	ab	ab	ab	ab	ab	ab	ab	ab	ab	aa	ab	bb	aa	aa	ab	ab	aa	bb	aa	ab	aa	ab
179	1	2	aa	ab	uu	aa	aa	uu	aa	bb	ab	ab	ab	ab	aa	bb	aa	aa	aa	bb	ab	aa	ab	uu	ab	aa	ab	bb	aa	aa	ab	ab	uu	ab	ab	aa	ab	aa	ab	ab	ab	aa	aa	ab	ab	ab	aa	ab	aa
180	1	2	aa	ab	aa	aa	aa	aa	uu	bb	ab	ab	ab	ab	aa	uu	aa	aa	aa	bb	ab	aa	ab	aa	ab	aa	ab	bb	ab	ab	ab	ab	ab	ab	ab	ab	aa	ab	bb	aa	aa	ab	aa	ab	ab	ab	aa	ab	ab
181	1	2	aa	ab	aa	aa	aa	ab	ab	ab	aa	ab	ab	ab	ab	ab	ab	ab	ab	ab	ab	ab	ab	ab	ab	ab	aa	ab	ab	ab	aa	aa	ab	aa	aa	aa	uu	aa	ab	ab	ab	aa	aa	ab	ab	ab	aa	ab	aa
182	1	2	ab	ab	ab	ab	ab	bb	bb	aa	aa	aa	aa	aa	bb	aa	bb	bb	bb	ab	ab	ab	ab	ab	ab	ab	aa	ab	ab	ab	aa	aa	ab	aa	aa	aa	ab	aa	ab	ab	ab	aa	aa	bb	aa	bb	aa	bb	aa
183	1	2	ab	aa	bb	bb	bb	bb	bb	ab	ab	aa	aa	aa	ab	ab	ab	ab	ab	ab	aa	ab	aa	ab	aa	ab	ab	ab	ab	ab	ab	ab	ab	ab	ab	ab	ab	ab	ab	ab	ab	ab	ab	ab	ab	ab	ab	ab	ab
[truncated: 382 more columns]

## Sheet: info2340
marker	locus-Chr_v1
m1	chr07-54581346
m2	chr07-54768644
m4	chr07-55008420
m5	chr07-54438403
m6	chr07-54795762
m10	chr07-52763827
m13	chr07-51854494
m14	chr07-50650459
m15	chr07-50903265
m16	chr07-53517956
m17	chr07-51562641
m18	chr07-50727582
m20	chr07-45908901
m22	chr07-44431438
m23	chr07-44598216
m24	chr07-46081176
m25	chr07-44167397
m26	chr07-41554359
m28	chr07-41408327
m29	chr07-41398069
m30	chr07-40807081
m31	chr07-39947619
m34	chr07-39983785
m35	chr07-40424507
m38	chr07-39365948
m39	chr07-39330671
m41	chr07-37079689
m42	chr07-36973651
m43	chr07-38565255
m44	chr07-37701420
m45	chr07-34929554
m49	chr07-27827842
m52	chr07-26854277
m53	chr07-12831497
m54	chr07-17418104
m60	chr07-5956101
m61	chr07-9498633
m63	chr07-9837422
m64	chr07-8046998
m65	chr07-5164972
m66	chr07-3357328
m67	chr07-5602281
m68	chr07-3014850
m70	chr07-2716150
m72	chr07-2945407
m73	chr07-3682706
m76	chr01-78189148
m77	chr01-64113208
m78	chr01-75465274
m79	chr01-67707447
m83	chr01-57065057
m84	chr01-55805546
m87	chr01-47555253
m88	chr01-55001055
m89	chr01-53167978
m96	chr01-26789291
m97	chr01-26597347
m98	chr01-27923464
m99	chr01-26737820
m102	chr01-22199462
m103	chr01-21735912
m105	chr01-10555570
m118	chr09-48838542
m120	chr09-48386124
m121	chr09-53636073
m122	chr09-47354807
m123	chr09-47787097
m124	chr09-45389195
m125	chr09-53154494
m126	chr09-44378679
m127	chr09-39531112
m128	chr09-43131636
m129	chr09-43510258
m132	chr09-41469259
m133	chr09-36802146
m134	chr09-35610858
m135	chr09-34916169
m136	chr09-35090657
m137	chr09-33899470
m138	chr09-33212155
m139	chr09-33797423
m140	chr09-34940945
m143	chr09-32304679
m144	chr09-32206393
m145	chr09-33013786
m146	chr09-31812157
m148	chr09-30566590
m149	chr09-30399413
m150	chr09-31143900
m151	chr09-29435801
m152	chr09-22659654
m153	chr09-24275270
m155	chr09-30370546
m156	chr09-27213197
m159	chr09-18349597
m160	chr09-20561759
m164	chr09-17725835
m166	chr09-16431284
m168	chr09-14271627
m169	chr09-14455481
m170	chr09-13495688
m171	chr09-12721433
m172	chr09-14353769
m173	chr09-12604380
m177	chr09-9917577
m178	chr09-8869388
m179	chr09-5639783
m180	chr09-6007413
m181	chr09-7143502
m182	chr09-7268300
m184	chr09-3385006
m186	chr09-5414544
m187	chr09-4648648
m188	chr09-2848187
m189	chr09-2783316
m190	chr09-3112579
m191	chr09-5705553
m192	chr09-6145989
m193	chr09-2185042
m196	chr09-7639469
m198	chr09-824047
m200	chr09-706569
m202	chr09-364935
m204	chr09-1341401
m206	chr08-1393527
m207	chr08-2157897
m209	chr08-2202509
m212	chr08-4394213
m213	chr08-552973
m214	chr08-11271582
m215	chr08-7300456
m216	chr08-6542347
m217	chr08-14928128
m218	chr08-3169764
m219	chr08-11491129
m220	chr08-10372603
m222	chr08-11681513
m223	chr08-10759803
m224	chr08-12617224
m226	chr08-12804155
m229	chr08-14278944
m230	chr08-17879010
m231	chr08-18489326
m232	chr08-18912900
m234	chr08-18112530
m236	chr08-17314954
m237	chr08-15389353
m239	chr08-20669835
m240	chr08-20148373
m241	chr08-20934803
m243	chr08-20346010
m245	chr08-23220455
m246	chr08-21691919
m247	chr08-22320162
m248	chr08-23159058
m249	chr08-24755231
m250	chr08-23885898
m251	chr08-22317751
m252	chr08-29568460
m253	chr08-23190625
m255	chr08-27933616
m257	chr08-33782971
m259	chr08-27914782
m260	chr08-29532019
m261	chr08-29556080
m265	chr08-23113595
m266	chr08-30887398
m267	chr08-31693076
m268	chr08-33642164
m269	chr08-34914958
m271	chr03-5917979
m275	chr03-1746450
m276	chr03-14466586
m277	chr03-14343933
m278	chr03-13190699
m279	chr03-24129707
m281	chr03-22829375
m282	chr03-24438129
m285	chr03-31303217
m286	chr03-31366142
m287	chr03-24469800
m288	chr03-33646415
m292	chr03-36188697
m293	chr03-36149625
m294	chr03-38461611
m295	chr03-37444935
m296	chr03-39713615
m297	chr03-37730327
m298	chr03-38745873
m299	chr03-36143291
m302	chr03-41475951
m303	chr03-43821881
m304	chr03-44730061
m305	chr03-48880873
m307	chr03-50910713
m309	chr03-50492855
m310	chr03-50580065
m311	chr03-49469252
m312	chr03-53121753
m313	chr03-52804374
m314	chr03-49832384
m316	chr03-53715156
m319	chr03-53998904
m320	chr03-57237994
m321	chr03-54804499
m323	chr03-55850825
m326	chr03-57117198
m327	chr03-57981002
m328	chr03-57504705
m330	chr02-2361847
m331	chr02-2561827
m332	chr02-2785489
m334	chr02-3546278
m336	chr02-6446314
m337	chr02-6305981
m338	chr02-7981329
m339	chr02-8546431
m340	chr02-1859843
m341	chr02-12685102
m342	chr02-11035985
m343	chr02-10982560
m344	chr02-10928353
m346	chr02-11147653
m347	chr02-15792976
m348	chr02-12680396
m349	chr02-14329989
m350	chr02-14188791
m351	chr02-13369610
m352	chr02-17639152
m353	chr02-17147649
m358	chr02-18061538
m359	chr02-18469629
m360	chr02-20853802
m361	chr02-20372917
m362	chr02-19936618
m364	chr02-40657670
m365	chr02-46742561
m366	chr02-47828925
m367	chr02-49714824
m369	chr02-51911556
m372	chr05-59801121
m376	chr05-58320194
m378	chr05-53779268
m379	chr05-53508221
m380	chr05-53037154
m381	chr05-52097406
m382	chr05-50231022
m383	chr05-50034406
m385	chr05-50205870
m389	chr05-44957985
m391	chr05-43915693
m394	chr05-40911911
m395	chr05-42080225
m396	chr05-41069125
m397	chr05-38614062
m399	chr05-35833008
m400	chr05-36285470
m401	chr05-34215321
m402	chr05-31557725
m405	chr05-30129142
m406	chr05-30958454
m409	chr05-26699670
m410	chr05-27435331
m411	chr05-28962306
m413	chr05-29632743
m415	chr05-28970812
m417	chr05-27926334
m419	chr05-23112019
m420	chr05-22434219
m421	chr05-21475055
m424	chr05-21224627
m425	chr05-21320756
m426	chr05-20169452
m429	chr05-20165078
m430	chr05-18411899
m431	chr05-16477665
m434	chr05-17782068
m437	chr05-17152777
m438	chr05-16512821
m439	chr05-17062309
m440	chr05-15810074
m441	chr05-17427928
m443	chr05-16260914
m444	chr05-14414199
m447	chr05-13542456
m448	chr05-14060534
m449	chr05-12756295
m450	chr05-12641942
m451	chr05-12653172
m452	chr05-10503156
m453	chr05-11738102
m454	chr05-9730138
m455	chr05-8314869
m456	chr05-9576957
m457	chr05-9869907
m458	chr05-8445681
m460	chr05-8771713
m461	chr05-7909967
m464	chr05-7095942
m465	chr05-6816730
m466	chr05-7046868
m467	chr05-6754839
m469	chr05-4853883
m471	chr05-4035035
m472	chr05-6550407
m473	chr05-3480371
m475	chr05-5701971
m476	chr05-5249063
m477	chr05-2510222
m478	chr05-6191236
m479	chr05-2550554
m480	chr05-2273414
m483	chr05-3775249
m486	chr04-62052636
m487	chr04-62075210
m488	chr04-60641760
m490	chr04-55953960
m491	chr04-55128649
m492	chr04-51352142
m493	chr04-54242349
m494	chr04-54250647
m496	chr04-54884880
m499	chr04-59240237
m501	chr04-59232599
m502	chr04-54004958
m503	chr04-49983803
m504	chr04-46650758
m507	chr04-49979419
m508	chr04-49843821
m510	chr04-47762568
m512	chr04-44761447
m513	chr04-50132782
m515	chr04-28212138
m517	chr04-37164253
m518	chr04-41255633
m521	chr04-28981217
m524	chr04-29362815
m526	chr04-32192860
m528	chr04-25031561
m529	chr04-28098547
m532	chr04-27795057
m534	chr04-26661637
m535	chr04-25055997
m537	chr04-24581103
m539	chr04-25234227
m540	chr04-24601864
m541	chr04-21868230
m544	chr04-7040871
m545	chr04-7073346
m548	chr04-7348816
m550	chr04-9496502
m554	chr10-37836688
m555	chr10-36804353
m556	chr10-36420522
m557	chr10-31735775
m558	chr10-32963116
m561	chr10-28858877
m562	chr10-27283684
m563	chr10-24142283
m565	chr10-22785955
m566	chr10-20352037
m567	chr10-19708613
m569	chr10-14482113
m571	chr10-26687538
m572	chr10-24523014
m573	chr10-16506825
m574	chr10-19489570
m576	chr10-16508513
m577	chr10-7413276
m579	chr10-12368822
m581	chr10-7939589
m584	chr10-7844699
m585	chr10-6183395
m586	chr10-7215534
m587	chr10-7218778
m588	chr10-4561876
m589	chr10-11895610
m592	chr10-4241731
m593	chr10-4306891
m595	chr10-3905294
m597	chr06-54470553
m598	chr06-51160006
m600	chr06-50294215
m601	chr06-49775524
m603	chr06-50163451
m605	chr06-49016344
m606	chr06-47622092
m607	chr06-46822944
m608	chr06-46946783
m611	chr06-43749451
m612	chr06-42435832
m613	chr06-43068375
m615	chr06-42932418
m616	chr06-37330785
m617	chr06-37339247
m618	chr06-37323921
m619	chr06-35470997
m621	chr06-34365392
m622	chr06-33251598
m623	chr06-32183486
m624	chr06-28167017
m625	chr06-26889733
m626	chr06-23219618
m627	chr06-28052932
m629	chr06-28148463
m630	chr06-21257315
m632	chr06-24244920
m633	chr06-23272892
m634	chr06-18021961
m635	chr06-14460894
m636	chr06-14627280
m637	chr06-17364961
m639	chr06-13244264
m640	chr06-14471005
m641	chr06-4820429
m642	chr06-12796619
m643	chr06-11838722
m644	chr06-3015131
m645	chr06-8070239
m646	chr06-11917563
m648	chr06-11992379
m649	chr06-3583828
m652	chr06-3343429
m653	chr06-11658790
m657	chr06-4069983
m658	chr06-4189448
m660	chr06-3480880
m662	chr06-2602780
m663	chr06-951486

## Sheet: map3123
m49.1	16.464	1
m48.1	17.967	1
m42.1	50.382	1
m40.1	60.591	1
m39.1	61.548	1
m36.1	63.009	1
m31.1	63.157	1
m38.1	65.517	1
m8.1	71.923	1
m28.1	93.67	1
m30.1	93.679	1
m12.1	107.559	1
m13.1	108.439	1
m51.1	118.575	1
m22.1	124.253	1
m19.1	126.22	1
m21.1	127.123	1
m2.1	141.232	1
m1.1	170.757	1
m303.2	2.581	2
m302.2	2.611	2
m308.2	2.832	2
m313.2	3.92	2
m307.2	5.13	2
m309.2	5.651	2
m311.2	5.731	2
m312.2	9.115	2
m314.2	9.437	2
m317.2	9.751	2
m323.2	11.814	2
m322.2	12.081	2
m321.2	12.141	2
m325.2	13.944	2
m324.2	14.78	2
m328.2	15.294	2
m327.2	15.342	2
m319.2	15.824	2
m329.2	16.7	2
m331.2	18.562	2
m330.2	18.695	2
m336.2	20.032	2
m334.2	21.968	2
m337.2	22.078	2
m338.2	23.125	2
m340.2	24.591	2
m341.2	25.209	2
m352.2	26.544	2
m343.2	27.53	2
m348.2	27.715	2
m350.2	27.77	2
m344.2	27.885	2
m342.2	28.829	2
m346.2	28.96	2
m353.2	29.492	2
m354.2	31.437	2
m356.2	32.111	2
m355.2	33.384	2
m358.2	33.408	2
m362.2	35.267	2
m361.2	35.398	2
m365.2	35.524	2
m364.2	35.707	2
m363.2	36.515	2
m366.2	36.544	2
m373.2	37.891	2
m369.2	37.915	2
m374.2	38.054	2
m375.2	38.378	2
m371.2	39.482	2
m370.2	39.514	2
m377.2	39.618	2
m376.2	40.058	2
m379.2	40.665	2
m382.2	43.114	2
m385.2	43.224	2
m386.2	43.835	2
m387.2	44.535	2
m384.2	44.766	2
m390.2	47.575	2
m389.2	48.095	2
m392.2	48.763	2
m393.2	48.85	2
m394.2	49.538	2
m398.2	50.549	2
m397.2	50.608	2
m395.2	51.183	2
m402.2	51.887	2
m406.2	52.263	2
m403.2	52.643	2
m401.2	53.272	2
m399.2	53.362	2
m405.2	54.96	2
m408.2	57.657	2
m404.2	57.801	2
m412.2	58.579	2
m409.2	58.766	2
m414.2	61.214	2
m419.2	61.441	2
m415.2	61.471	2
m416.2	61.878	2
m417.2	62.537	2
m422.2	64.128	2
m426.2	64.135	2
m420.2	64.489	2
m423.2	65.556	2
m421.2	67.426	2
m226.3	3.958	3
m227.3	13.178	3
m229.3	13.32	3
m230.3	21.774	3
m235.3	48.008	3
m232.3	49.516	3
m233.3	49.623	3
m238.3	54.577	3
m248.3	55.345	3
m241.3	55.358	3
m243.3	58.006	3
m247.3	62.909	3
m256.3	67.695	3
m255.3	70.427	3
m249.3	70.881	3
m257.3	70.943	3
m260.3	78.067	3
m261.3	81.115	3
m263.3	86.992	3
m264.3	87.635	3
m270.3	119.722	3
m271.3	120.056	3
m269.3	120.15	3
m267.3	120.203	3
m266.3	120.544	3
m273.3	121.775	3
m277.3	122.296	3
m275.3	122.314	3
m279.3	123.956	3
m280.3	124.745	3
m289.3	125.956	3
m283.3	126.322	3
m287.3	126.355	3
m288.3	128.762	3
m282.3	129.499	3
m281.3	130.063	3
m290.3	131.963	3
m294.3	132.27	3
m293.3	133.545	3
m296.3	133.975	3
m292.3	136.112	3
m297.3	137.283	3
m298.3	137.666	3
m301.3	140.141	3
m300.3	140.854	3
m180.4	13.855	4
m188.4	15.783	4
m187.4	17.353	4
m186.4	17.776	4
m184.4	18.77	4
m185.4	18.776	4
m183.4	20.434	4
m177.4	26.172	4
m175.4	29.443	4
m159.4	29.523	4
m178.4	29.981	4
m172.4	30.792	4
m173.4	31.522	4
m162.4	32.367	4
m171.4	32.766	4
m167.4	32.852	4
m155.4	34.597	4
m168.4	35.187	4
m160.4	35.93	4
m174.4	37.024	4
m153.4	38.768	4
m154.4	41.154	4
m150.4	41.33	4
m157.4	41.412	4
m151.4	42.876	4
m148.4	42.903	4
m156.4	43.749	4
m505.5	1.166	5
m499.5	1.96	5
m498.5	2.333	5
m501.5	2.904	5
m506.5	2.939	5
m504.5	3.474	5
m502.5	4.153	5
m497.5	21.346	5
m494.5	23.741	5
m495.5	23.764	5
m493.5	24.801	5
m491.5	25.665	5
m490.5	25.957	5
m492.5	26.792	5
m478.5	29.566	5
m477.5	29.582	5
m483.5	30.154	5
m485.5	30.183	5
m482.5	30.33	5
m472.5	30.746	5
m475.5	31.966	5
m469.5	31.995	5
m470.5	32.018	5
m471.5	32.027	5
m467.5	32.72	5
m462.5	33.058	5
m466.5	34.187	5
m464.5	34.443	5
m463.5	34.928	5
m459.5	36.442	5
m461.5	36.811	5
m460.5	36.907	5
m458.5	37.88	5
m456.5	39.078	5
m449.5	39.613	5
m457.5	40.068	5
m453.5	40.266	5
m451.5	41.035	5
m452.5	41.479	5
m450.5	42.587	5
m448.5	43.175	5
m445.5	43.958	5
m446.5	44.181	5
m447.5	46.105	5
m443.5	46.612	5
m444.5	47.537	5
m442.5	52.447	5
m439.5	55.313	5
m438.5	56.14	5
m437.5	56.475	5
m436.5	57.594	5
m435.5	58.554	5
m434.5	58.632	5
m430.5	63.539	5
m429.5	64.473	5
m427.5	65.829	5
m428.5	66.149	5
m708.6	1.052	6
m710.6	1.568	6
m709.6	2.075	6
m704.6	2.877	6
m695.6	5.275	6
m711.6	5.854	6
m706.6	7.059	6
m705.6	7.674	6
m697.6	8.922	6
m694.6	14.642	6
m701.6	16.131	6
m700.6	16.178	6
m696.6	17.026	6
m699.6	17.786	6
m698.6	18.812	6
m685.6	19.813	6
m688.6	20.751	6
m687.6	22.567	6
m686.6	22.758	6
m690.6	23.506	6
m692.6	24.057	6
m683.6	25.868	6
m681.6	25.921	6
m675.6	25.97	6
m677.6	26.341	6
m679.6	26.803	6
m678.6	26.852	6
m676.6	27.979	6
m670.6	29.263	6
m671.6	29.433	6
m672.6	29.727	6
m673.6	30.041	6
m667.6	31.118	6
m668.6	31.139	6
m669.6	31.186	6
m665.6	32.333	6
m666.6	33.833	6
m661.6	36.248	6
m664.6	36.387	6
m662.6	37.761	6
m663.6	37.991	6
m659.6	39.213	6
m656.6	40.324	6
m658.6	40.405	6
m652.6	41.397	6
m654.6	41.399	6
m655.6	41.502	6
m651.6	42.801	6
m657.6	43.179	6
m647.6	43.629	6
m645.6	45.365	6
m641.6	45.817	6
m640.6	47.612	6
m634.6	48.064	6
m639.6	48.365	6
m638.6	48.759	6
m637.6	49.037	6
m632.6	51.763	6
m631.6	51.9	6
m628.6	55.027	6
m625.6	55.456	6
m627.6	55.697	6
m629.6	56.557	6
m618.6	58.958	6
m620.6	58.977	6
m624.6	59.718	6
m623.6	60.38	6
m622.6	60.633	6
m56.7	1.089	7
m57.7	1.151	7
m58.7	2.963	7
m53.7	3.003	7
m50.7	3.256	7
m51.7	3.333	7
m48.7	6.084	7
m59.7	6.375	7
m45.7	6.584	7
m47.7	8.242	7
m46.7	10.836	7
m36.7	11.917	7
m43.7	14.484	7
m32.7	19.219	7
m33.7	19.256	7
m34.7	19.284	7
m27.7	21.511	7
m26.7	27.163	7
m28.7	29.15	7
m30.7	33.421	7
m29.7	37.541	7
m24.7	39.331	7
m23.7	40.991	7
m22.7	41.436	7
m18.7	43.015	7
m9.7	44.142	7
m13.7	44.279	7
m14.7	44.689	7
m8.7	46.011	7
m15.7	46.585	7
m10.7	48.827	7
m11.7	49.082	7
m5.7	49.966	7
m3.7	56.686	7
m166.8	1.353	8
m162.8	1.551	8
m159.8	2.232	8
m158.8	2.414	8
m164.8	3.196	8
m165.8	3.231	8
m163.8	5.393	8
m156.8	5.737	8
m157.8	7.305	8
m170.8	7.574	8
m172.8	7.577	8
m167.8	7.712	8
m178.8	7.983	8
m177.8	8.644	8
m176.8	8.999	8
m175.8	9.017	8
m183.8	9.883	8
m168.8	10.335	8
m184.8	12.293	8
m185.8	12.587	8
m188.8	14.556	8
m189.8	17.709	8
m190.8	18.287	8
m201.8	19.671	8
m199.8	20.104	8
m194.8	20.274	8
m195.8	20.808	8
m196.8	22.306	8
m197.8	23.307	8
m213.8	25.894	8
m212.8	28.928	8
m210.8	29.419	8
m216.8	32.648	8
m215.8	33.548	8
m217.8	34.532	8
m223.8	36.59	8
m225.8	36.676	8
m53.9	3.494	9
m58.9	3.606	9
m56.9	5.999	9
m54.9	6.498	9
m57.9	6.641	9
m55.9	6.794	9
m59.9	7.286	9
m60.9	10.964	9
m65.9	13.596	9
m63.9	13.934	9
m69.9	14.919	9
m62.9	15.777	9
m68.9	15.881	9
m66.9	15.977	9
m70.9	16.732	9
m61.9	17.805	9
m72.9	17.826	9
m79.9	18.942	9
m80.9	19.997	9
m82.9	20.285	9
m81.9	20.346	9
m84.9	23.25	9
m87.9	29.629	9
m91.9	31.39	9
m89.9	31.529	9
m94.9	32.233	9
m96.9	33.791	9
m88.9	35.284	9
m97.9	35.713	9
m103.9	36.371	9
m100.9	36.497	9
m102.9	36.863	9
m109.9	37.363	9
m107.9	37.476	9
m112.9	38.062	9
m108.9	38.6	9
m105.9	38.627	9
m104.9	38.792	9
m106.9	38.798	9
m110.9	40.251	9
m119.9	40.685	9
m118.9	40.881	9
m113.9	41.097	9
m129.9	45.844	9
m126.9	47.431	9
m125.9	47.682	9
m131.9	48.286	9
m134.9	52.433	9
m137.9	53.388	9
m136.9	53.712	9
m135.9	53.991	9
m138.9	57.066	9
m140.9	57.817	9
m143.9	58.237	9
m139.9	58.822	9
m141.9	60.209	9
m614.10	8.618	10
m612.10	10.276	10
m613.10	11.317	10
m608.10	13.881	10
m596.10	16.32	10
m602.10	16.327	10
m597.10	16.767	10
m595.10	17.958	10
m594.10	27.976	10
m592.10	30.336	10
m591.10	30.372	10
m593.10	30.425	10
m589.10	32.755	10
m582.10	34.996	10
m590.10	37.335	10
m576.10	40.202	10
m584.10	40.372	10
m580.10	43.643	10
m574.10	45.971	10
m572.10	47.722	10
m569.10	54.604	10
m567.10	57.77	10
m564.10	64.488	10
m566.10	65.272	10
m563.10	69.181	10
m556.10	71.394	10
m557.10	73.445	10
m550.10	78.39	10
m549.10	79.906	10
m548.10	81.728	10
m547.10	81.868	10
m546.10	83.031	10
m543.10	83.166	10
m545.10	83.243	10

## Sheet: primary3123
sample	sire	dam	m1.1	m2.1	m8.1	m12.1	m13.1	m19.1	m21.1	m22.1	m28.1	m30.1	m31.1	m36.1	m38.1	m39.1	m40.1	m42.1	m48.1	m49.1	m51.1	m302.2	m303.2	m307.2	m308.2	m309.2	m311.2	m312.2	m313.2	m314.2	m317.2	m319.2	m321.2	m322.2	m323.2	m324.2	m325.2	m327.2	m328.2	m329.2	m330.2	m331.2	m334.2	m336.2	m337.2	m338.2	m340.2	m341.2	m342.2
1	-1	-1	ab	ab	ab	ba	ba	ab	ab	ab	ba	ab	ba	ba	ab	ab	ba	aa	aa	aa	aa	ab	ab	ab	aa	ab	ba	aa	aa	aa	ab	ba	ba	ba	ab	ba	ba	ab	ba	ab	ba	ab	ab	ba	ba	ba	ba	ba	ba
2	-1	-1	ab	ab	ab	ba	ba	ab	ab	ab	ba	ab	ba	ba	ab	ab	ba	ba	ab	ab	ab	ab	ab	ab	ba	ab	ba	ba	ba	ba	ab	ba	ba	ba	ab	ba	ba	ab	ba	ab	ba	ab	ab	ba	ba	ba	ba	ba	ba
3	1	2	ab	ab	ab	ab	ab	ab	ab	ab	bb	aa	bb	bb	aa	aa	bb	ab	aa	aa	aa	ab	ab	ab	aa	ab	ab	aa	aa	aa	ab	aa	aa	aa	bb	aa	aa	bb	aa	bb	aa	bb	bb	aa	aa	aa	aa	aa	aa
4	1	2	ab	ab	ab	ab	ab	bb	bb	ab	ab	ab	ab	ab	ab	ab	ab	aa	ab	ab	ab	uu	aa	aa	ab	aa	bb	ab	ab	ab	aa	bb	bb	bb	aa	bb	bb	aa	bb	aa	bb	aa	aa	bb	bb	bb	bb	bb	bb
5	1	2	aa	aa	aa	uu	bb	aa	aa	aa	bb	aa	ab	ab	ab	ab	ab	aa	ab	ab	ab	bb	bb	bb	aa	bb	aa	aa	aa	aa	bb	aa	aa	aa	bb	aa	aa	bb	aa	ab	ab	ab	ab	ab	ab	ab	ab	ab	ab
6	1	2	uu	aa	aa	bb	bb	aa	aa	aa	bb	aa	bb	bb	aa	aa	bb	ab	aa	aa	aa	bb	bb	bb	aa	bb	aa	aa	aa	aa	bb	aa	aa	uu	bb	aa	aa	bb	aa	bb	aa	bb	ab	ab	ab	ab	ab	ab	ab
7	1	2	aa	aa	aa	bb	bb	aa	aa	aa	bb	aa	bb	bb	aa	aa	bb	ab	aa	aa	aa	ab	ab	ab	ab	ab	ab	ab	ab	ab	ab	ab	ab	ab	ab	ab	ab	ab	ab	ab	ab	ab	ab	ab	ab	ab	ab	ab	ab
8	1	2	ab	ab	ab	aa	aa	bb	bb	bb	aa	bb	aa	aa	bb	bb	aa	aa	ab	ab	ab	ab	ab	ab	ab	ab	ab	ab	ab	ab	ab	ab	ab	ab	ab	ab	uu	ab	ab	aa	bb	aa	aa	bb	bb	bb	bb	bb	bb
9	1	2	ab	ab	ab	aa	uu	bb	bb	bb	aa	bb	aa	aa	bb	bb	aa	aa	ab	ab	ab	ab	ab	ab	aa	ab	ab	aa	aa	aa	ab	ab	ab	ab	ab	ab	ab	ab	ab	ab	ab	ab	ab	ab	ab	ab	ab	ab	ab
10	1	2	ab	ab	aa	bb	bb	aa	aa	aa	bb	aa	uu	bb	aa	aa	bb	ab	aa	aa	ab	ab	ab	ab	ab	ab	ab	ab	ab	ab	ab	ab	ab	ab	ab	ab	ab	ab	ab	ab	ab	ab	ab	ab	ab	ab	ab	ab	ab
11	1	2	ab	ab	ab	ab	ab	ab	ab	ab	ab	ab	ab	ab	ab	ab	ab	ab	aa	aa	aa	aa	aa	aa	ab	aa	bb	ab	ab	ab	aa	bb	bb	bb	aa	bb	bb	aa	bb	ab	ab	ab	ab	ab	ab	ab	ab	ab	ab
12	1	2	ab	ab	ab	aa	aa	bb	uu	bb	aa	bb	aa	aa	bb	bb	aa	aa	ab	aa	aa	ab	ab	ab	ab	ab	ab	ab	ab	ab	ab	ab	ab	ab	ab	ab	ab	ab	ab	ab	ab	ab	ab	ab	ab	ab	ab	ab	aa
13	1	2	ab	ab	ab	ab	ab	ab	ab	ab	ab	ab	ab	ab	ab	aa	bb	ab	aa	aa	aa	aa	aa	aa	ab	aa	bb	ab	ab	ab	aa	bb	bb	bb	aa	bb	bb	aa	bb	aa	bb	aa	aa	bb	bb	bb	bb	bb	bb
14	1	2	aa	aa	aa	ab	bb	aa	aa	aa	aa	bb	aa	uu	aa	bb	ab	aa	aa	aa	aa	ab	ab	ab	ab	ab	ab	aa	aa	aa	ab	aa	aa	aa	ab	aa	aa	ab	ab	ab	aa	ab	ab	aa	aa	ab	aa	aa	aa
15	1	2	aa	aa	ab	ab	ab	ab	ab	ab	ab	ab	ab	ab	ab	ab	ab	aa	ab	ab	aa	aa	aa	aa	ab	aa	bb	ab	ab	ab	aa	bb	bb	bb	aa	bb	bb	aa	bb	aa	bb	aa	aa	bb	bb	bb	bb	bb	bb
16	1	2	aa	ab	ab	ab	ab	ab	ab	ab	ab	ab	ab	ab	ab	ab	ab	ab	aa	ab	ab	ab	ab	ab	aa	ab	ab	aa	aa	aa	ab	ab	ab	ab	ab	ab	ab	ab	ab	ab	ab	ab	ab	ab	ab	ab	ab	ab	ab
17	1	2	uu	aa	aa	bb	bb	aa	aa	aa	bb	aa	ab	bb	aa	aa	bb	ab	aa	aa	aa	ab	ab	ab	ab	ab	ab	ab	ab	ab	ab	uu	ab	ab	ab	ab	aa	ab	ab	bb	bb	ab	ab	ab	uu	ab	ab	ab	ab
18	1	2	uu	aa	uu	bb	bb	aa	aa	aa	bb	aa	bb	bb	aa	aa	bb	ab	aa	aa	aa	bb	bb	bb	aa	bb	aa	aa	aa	aa	bb	aa	aa	aa	bb	aa	aa	bb	aa	bb	aa	bb	bb	aa	aa	aa	aa	uu	aa
19	1	2	ab	ab	ab	ab	ab	ab	ab	ab	ab	ab	bb	bb	aa	aa	bb	ab	aa	aa	aa	bb	bb	bb	aa	bb	aa	aa	aa	aa	uu	aa	aa	uu	bb	aa	aa	bb	aa	bb	ab	ab	ab	ab	ab	ab	ab	ab	ab
20	1	2	ab	ab	ab	ab	ab	ab	ab	ab	ab	ab	ab	ab	ab	ab	ab	ab	aa	aa	aa	bb	bb	ab	aa	bb	aa	aa	aa	aa	bb	aa	aa	aa	uu	aa	aa	bb	aa	uu	aa	bb	bb	uu	aa	aa	aa	aa	aa
21	1	2	ab	uu	uu	bb	bb	aa	aa	ab	bb	aa	uu	bb	aa	aa	bb	ab	aa	aa	aa	bb	bb	bb	aa	bb	aa	aa	aa	aa	bb	aa	aa	aa	bb	aa	aa	uu	aa	uu	uu	bb	bb	aa	aa	uu	uu	aa	uu
22	1	2	uu	ab	ab	aa	aa	bb	bb	bb	aa	bb	ab	ab	uu	ab	ab	ab	aa	aa	aa	bb	bb	bb	aa	bb	aa	aa	aa	aa	ab	uu	ab	uu	ab	ab	aa	ab	ab	bb	uu	ab	ab	ab	uu	ab	uu	ab	ab
23	1	2	ab	ab	ab	ab	ab	ab	ab	ab	ab	ab	ab	ab	ab	ab	ab	aa	ab	ab	ab	bb	bb	bb	aa	bb	aa	aa	aa	aa	bb	aa	aa	aa	bb	aa	aa	bb	aa	bb	aa	bb	bb	aa	aa	aa	ab	ab	ab
24	1	2	aa	uu	uu	bb	bb	aa	uu	aa	bb	aa	bb	bb	aa	aa	bb	ab	aa	aa	aa	ab	ab	ab	ab	ab	ab	ab	ab	ab	ab	ab	ab	ab	ab	ab	ab	ab	ab	ab	ab	ab	ab	ab	ab	ab	ab	ab	ab
25	1	2	ab	ab	ab	ab	ab	ab	ab	ab	ab	ab	aa	aa	bb	bb	aa	aa	ab	ab	ab	ab	ab	ab	ab	ab	ab	ab	ab	ab	ab	ab	ab	ab	ab	ab	ab	ab	ab	ab	ab	ab	ab	ab	ab	ab	ab	ab	ab
26	1	2	aa	aa	aa	bb	bb	aa	aa	aa	bb	aa	ab	ab	ab	ab	ab	aa	ab	ab	ab	bb	bb	ab	aa	ab	ab	aa	aa	aa	ab	ab	ab	ab	ab	ab	ab	ab	ab	ab	ab	ab	ab	ab	ab	ab	ab	ab	bb
27	1	2	aa	ab	uu	ab	ab	ab	ab	ab	ab	ab	ab	ab	ab	ab	ab	aa	ab	ab	aa	bb	bb	bb	aa	bb	aa	aa	aa	aa	uu	aa	aa	aa	bb	aa	aa	bb	aa	bb	aa	bb	uu	aa	uu	aa	aa	uu	aa
28	1	2	ab	ab	ab	aa	aa	bb	bb	bb	aa	bb	aa	aa	bb	bb	aa	aa	ab	ab	ab	ab	ab	ab	aa	ab	ab	aa	aa	aa	ab	ab	ab	ab	ab	ab	ab	ab	ab	ab	ab	ab	ab	ab	ab	ab	ab	ab	ab
29	1	2	ab	ab	ab	aa	aa	bb	bb	bb	ab	ab	ab	ab	ab	ab	ab	ab	aa	aa	aa	ab	ab	aa	ab	aa	bb	ab	ab	ab	aa	ab	bb	uu	aa	uu	bb	aa	uu	aa	bb	aa	aa	bb	bb	uu	bb	uu	bb
30	1	2	aa	aa	aa	bb	bb	aa	aa	aa	bb	aa	uu	bb	aa	aa	bb	ab	aa	aa	aa	ab	ab	ab	aa	ab	ab	aa	aa	aa	ab	ab	ab	ab	ab	ab	ab	ab	ab	ab	ab	ab	ab	ab	ab	ab	ab	ab	ab
31	1	2	ab	ab	ab	ab	ab	ab	ab	ab	aa	bb	aa	aa	uu	bb	aa	aa	ab	ab	ab	bb	bb	bb	aa	bb	aa	aa	aa	aa	bb	ab	ab	ab	ab	ab	ab	ab	ab	ab	ab	ab	ab	ab	ab	ab	ab	ab	ab
32	1	2	ab	ab	ab	ab	ab	ab	ab	ab	ab	ab	ab	ab	ab	ab	ab	ab	aa	ab	ab	ab	ab	ab	aa	ab	ab	aa	aa	aa	ab	ab	ab	ab	ab	ab	ab	ab	ab	ab	ab	ab	ab	ab	ab	ab	ab	ab	aa
33	1	2	aa	uu	uu	bb	bb	uu	aa	aa	bb	aa	bb	bb	aa	aa	uu	ab	aa	aa	aa	bb	bb	bb	aa	bb	aa	aa	aa	aa	bb	aa	aa	aa	uu	aa	aa	bb	uu	uu	aa	bb	uu	aa	aa	aa	aa	uu	aa
34	1	2	ab	ab	ab	ab	ab	ab	ab	ab	ab	ab	bb	bb	aa	aa	bb	ab	aa	aa	aa	ab	ab	ab	ab	ab	ab	ab	ab	ab	ab	ab	ab	ab	ab	ab	ab	ab	ab	ab	bb	aa	ab	bb	bb	bb	bb	bb	bb
35	1	2	ab	ab	ab	aa	aa	uu	bb	bb	aa	uu	aa	aa	uu	bb	aa	ab	aa	aa	aa	bb	bb	bb	aa	bb	aa	aa	aa	aa	bb	aa	aa	aa	bb	aa	aa	bb	aa	bb	aa	bb	bb	aa	aa	aa	aa	aa	aa
36	1	2	aa	ab	ab	ab	ab	ab	ab	ab	ab	ab	ab	uu	ab	ab	ab	ab	aa	aa	aa	ab	ab	ab	ab	ab	ab	ab	ab	ab	ab	ab	ab	ab	ab	ab	ab	ab	ab	ab	ab	ab	ab	ab	ab	ab	uu	ab	ab
37	1	2	aa	aa	aa	bb	bb	uu	aa	aa	bb	aa	bb	bb	aa	aa	bb	ab	aa	aa	aa	ab	ab	ab	ab	ab	ab	ab	ab	ab	ab	ab	ab	ab	ab	ab	ab	ab	ab	ab	ab	ab	ab	ab	ab	ab	ab	ab	ab
38	1	2	ab	uu	ab	ab	ab	ab	ab	ab	ab	ab	ab	ab	ab	ab	ab	aa	ab	ab	ab	ab	ab	ab	aa	ab	ab	aa	aa	aa	aa	ab	ab	ab	ab	ab	ab	ab	ab	ab	ab	ab	ab	ab	ab	ab	ab	ab	ab
39	1	2	ab	ab	ab	aa	aa	uu	bb	uu	aa	bb	aa	aa	bb	uu	uu	aa	ab	ab	ab	ab	ab	ab	aa	ab	ab	aa	aa	aa	ab	ab	ab	ab	ab	ab	ab	ab	ab	ab	ab	ab	ab	ab	ab	ab	ab	ab	ab
40	1	2	aa	aa	aa	bb	bb	aa	aa	aa	bb	ab	bb	bb	aa	aa	bb	ab	aa	aa	aa	bb	bb	bb	aa	bb	aa	aa	aa	aa	bb	aa	aa	aa	bb	aa	aa	bb	aa	bb	uu	bb	bb	aa	aa	aa	aa	aa	aa
41	1	2	ab	ab	ab	ab	ab	ab	ab	ab	ab	ab	bb	bb	aa	aa	bb	ab	aa	aa	aa	aa	uu	aa	ab	aa	bb	ab	ab	ab	aa	bb	bb	bb	aa	uu	bb	aa	bb	aa	bb	aa	aa	bb	uu	bb	bb	bb	bb
42	1	2	ab	ab	ab	ab	ab	ab	ab	ab	ab	ab	uu	ab	ab	ab	ab	ab	aa	aa	aa	ab	ab	ab	ab	ab	ab	ab	ab	ab	ab	ab	ab	ab	ab	ab	ab	ab	ab	bb	aa	bb	bb	aa	aa	aa	aa	aa	aa
43	1	2	ab	ab	aa	bb	bb	ab	ab	ab	bb	aa	bb	bb	aa	aa	uu	ab	aa	ab	ab	ab	ab	ab	ab	ab	ab	ab	ab	ab	ab	ab	ab	ab	ab	ab	ab	ab	ab	ab	ab	ab	ab	ab	ab	ab	ab	ab	ab
44	1	2	ab	uu	ab	ab	ab	ab	ab	ab	ab	ab	aa	aa	uu	bb	aa	aa	ab	ab	ab	ab	ab	aa	ab	aa	bb	ab	ab	ab	aa	bb	bb	bb	aa	bb	uu	aa	uu	aa	bb	aa	uu	bb	bb	bb	bb	bb	bb
45	1	2	uu	aa	aa	bb	bb	aa	aa	aa	bb	aa	bb	bb	aa	aa	bb	ab	aa	aa	aa	ab	ab	ab	ab	ab	ab	ab	ab	ab	ab	ab	ab	ab	ab	ab	ab	ab	ab	ab	uu	ab	ab	ab	ab	ab	ab	ab	ab
46	1	2	ab	ab	ab	ab	ab	ab	ab	ab	ab	ab	ab	ab	ab	ab	ab	aa	ab	ab	ab	bb	bb	bb	aa	bb	aa	aa	aa	aa	bb	aa	aa	aa	bb	aa	aa	bb	aa	bb	aa	bb	bb	aa	aa	aa	aa	aa	aa
47	1	2	ab	ab	ab	ab	ab	ab	ab	ab	ab	ab	ab	ab	ab	ab	ab	aa	ab	ab	ab	ab	ab	ab	aa	ab	ab	aa	aa	aa	ab	ab	ab	ab	ab	ab	ab	ab	ab	ab	ab	ab	ab	ab	ab	ab	ab	ab	ab
48	1	2	ab	ab	ab	aa	aa	bb	bb	bb	aa	bb	aa	aa	bb	ab	ab	ab	aa	aa	aa	ab	ab	ab	ab	ab	ab	ab	ab	ab	ab	ab	ab	ab	ab	ab	ab	ab	ab	ab	ab	ab	ab	ab	bb	bb	bb	bb	bb
49	1	2	ab	ab	ab	ab	ab	ab	ab	ab	ab	ab	uu	ab	ab	bb	aa	aa	ab	ab	ab	ab	ab	ab	ab	ab	ab	ab	ab	ab	ab	ab	ab	ab	ab	ab	ab	ab	ab	ab	ab	ab	ab	ab	ab	ab	ab	ab	ab
50	1	2	ab	ab	ab	aa	aa	bb	bb	bb	aa	bb	aa	aa	bb	ab	ab	ab	aa	aa	aa	ab	ab	ab	ab	ab	ab	ab	ab	ab	aa	bb	bb	bb	aa	bb	bb	uu	bb	aa	bb	aa	aa	bb	bb	bb	bb	bb	bb
51	1	2	ab	ab	ab	ab	ab	ab	ab	ab	ab	ab	bb	bb	aa	aa	bb	ab	aa	aa	aa	ab	ab	ab	aa	ab	ab	aa	aa	aa	ab	ab	ab	ab	ab	ab	ab	ab	ab	ab	ab	ab	ab	ab	ab	ab	ab	ab	ab
52	1	2	aa	aa	aa	bb	bb	aa	aa	aa	bb	aa	bb	bb	aa	aa	bb	ab	aa	aa	aa	ab	ab	bb	aa	bb	aa	aa	aa	aa	bb	aa	aa	uu	bb	aa	aa	bb	aa	bb	aa	bb	bb	uu	aa	aa	aa	aa	aa
53	1	2	ab	ab	ab	ab	ab	ab	ab	ab	ab	ab	ab	ab	ab	ab	ab	ab	aa	ab	ab	ab	ab	ab	aa	ab	ab	aa	aa	aa	ab	ab	ab	ab	ab	ab	ab	ab	ab	ab	aa	ab	ab	ab	ab	ab	ab	ab	ab
54	1	2	ab	ab	ab	aa	aa	bb	bb	bb	aa	bb	ab	ab	ab	ab	ab	ab	aa	aa	aa	ab	ab	ab	ab	ab	ab	ab	ab	ab	ab	ab	ab	ab	ab	ab	ab	ab	ab	ab	ab	ab	ab	ab	ab	ab	ab	ab	ab
55	1	2	ab	ab	ab	ab	ab	ab	ab	ab	ab	uu	ab	uu	ab	ab	ab	aa	ab	ab	ab	ab	ab	ab	aa	ab	ab	aa	aa	aa	ab	uu	ab	ab	ab	ab	ab	ab	ab	ab	ab	ab	ab	ab	ab	uu	uu	uu	uu
56	1	2	ab	ab	ab	ab	ab	ab	ab	ab	ab	ab	ab	ab	ab	ab	ab	ab	aa	aa	aa	ab	ab	ab	ab	ab	ab	ab	ab	ab	ab	ab	ab	ab	ab	ab	ab	ab	ab	ab	ab	ab	ab	ab	ab	ab	ab	ab	ab
57	1	2	ab	ab	ab	ab	ab	ab	ab	ab	ab	ab	ab	ab	ab	ab	ab	ab	aa	ab	ab	bb	bb	ab	aa	ab	ab	aa	aa	aa	ab	ab	ab	ab	ab	ab	ab	ab	ab	ab	ab	ab	ab	ab	ab	ab	ab	ab	bb
58	1	2	ab	ab	ab	uu	ab	bb	uu	ab	aa	bb	aa	uu	uu	ab	uu	aa	ab	ab	ab	ab	ab	ab	ab	ab	ab	ab	ab	ab	ab	ab	ab	ab	ab	ab	ab	ab	ab	ab	ab	ab	ab	ab	ab	ab	ab	ab	ab
59	1	2	ab	ab	ab	ab	ab	ab	ab	ab	ab	ab	ab	ab	ab	ab	ab	aa	ab	ab	ab	aa	aa	aa	ab	aa	bb	ab	ab	ab	aa	bb	bb	bb	aa	bb	uu	aa	bb	aa	bb	aa	aa	bb	bb	bb	bb	bb	bb
60	1	2	ab	ab	ab	ab	ab	ab	ab	ab	ab	ab	ab	ab	ab	ab	ab	ab	aa	aa	aa	ab	ab	aa	ab	aa	bb	ab	ab	ab	aa	bb	bb	bb	aa	bb	bb	aa	bb	aa	bb	aa	aa	bb	bb	bb	bb	bb	bb
61	1	2	ab	uu	ab	ab	ab	ab	ab	ab	ab	ab	aa	aa	bb	bb	aa	aa	ab	ab	ab	ab	ab	ab	aa	ab	ab	aa	aa	aa	uu	aa	aa	uu	bb	aa	aa	bb	uu	uu	aa	bb	uu	aa	uu	uu	uu	uu	aa
62	1	2	aa	aa	ab	aa	aa	bb	bb	bb	aa	bb	aa	uu	bb	bb	uu	aa	ab	ab	aa	bb	bb	uu	aa	bb	aa	aa	aa	aa	bb	aa	aa	aa	uu	aa	aa	bb	aa	bb	aa	bb	bb	aa	uu	aa	aa	aa	aa
63	1	2	ab	ab	ab	ab	ab	ab	ab	ab	ab	ab	ab	ab	ab	ab	ab	aa	ab	ab	ab	aa	aa	aa	ab	aa	bb	ab	ab	ab	aa	bb	bb	bb	aa	bb	bb	aa	bb	aa	bb	aa	aa	bb	bb	bb	bb	bb	bb
64	1	2	aa	uu	aa	bb	bb	aa	uu	aa	bb	aa	uu	bb	uu	aa	bb	aa	ab	ab	ab	ab	ab	ab	ab	ab	ab	ab	ab	ab	ab	ab	ab	ab	ab	ab	ab	ab	ab	ab	ab	ab	uu	aa	aa	aa	aa	aa	aa
65	1	2	ab	ab	ab	ab	ab	ab	ab	ab	ab	ab	ab	ab	ab	ab	ab	aa	ab	ab	ab	ab	ab	ab	ab	ab	ab	ab	ab	ab	ab	ab	ab	ab	ab	ab	ab	ab	ab	ab	ab	ab	ab	ab	ab	ab	uu	ab	ab
66	1	2	ab	ab	ab	ab	ab	ab	ab	ab	aa	bb	aa	aa	bb	bb	aa	aa	ab	ab	ab	aa	aa	aa	ab	aa	bb	ab	ab	ab	aa	bb	bb	bb	aa	bb	bb	uu	bb	aa	bb	aa	aa	uu	bb	bb	bb	bb	bb
67	1	2	uu	aa	uu	bb	bb	aa	uu	aa	bb	aa	ab	ab	ab	ab	ab	ab	aa	aa	aa	ab	ab	ab	aa	ab	ab	aa	aa	aa	ab	uu	ab	ab	ab	ab	ab	ab	ab	uu	ab	ab	ab	ab	ab	ab	ab	ab	ab
68	1	2	ab	ab	ab	ab	ab	ab	ab	ab	ab	ab	uu	ab	ab	ab	ab	ab	aa	aa	aa	ab	ab	ab	ab	ab	ab	ab	ab	ab	aa	bb	bb	bb	aa	bb	uu	aa	bb	aa	bb	aa	aa	ab	bb	bb	bb	bb	uu
69	1	2	ab	ab	uu	ab	ab	ab	ab	ab	ab	ab	aa	aa	bb	bb	aa	aa	ab	ab	ab	bb	bb	bb	aa	bb	aa	aa	aa	aa	ab	aa	aa	aa	bb	aa	aa	bb	aa	bb	aa	bb	bb	aa	aa	aa	aa	aa	aa
70	1	2	uu	aa	aa	bb	bb	aa	aa	aa	bb	aa	ab	ab	ab	ab	ab	aa	ab	ab	ab	ab	ab	ab	aa	ab	ab	aa	aa	aa	ab	uu	ab	ab	ab	ab	ab	ab	ab	uu	ab	ab	ab	ab	ab	ab	ab	ab	ab
71	1	2	ab	ab	ab	ab	ab	ab	ab	ab	ab	uu	ab	ab	ab	ab	ab	aa	ab	ab	ab	ab	ab	ab	aa	ab	ab	aa	aa	aa	ab	ab	ab	ab	ab	ab	ab	ab	ab	ab	ab	ab	ab	ab	ab	ab	ab	ab	ab
72	1	2	ab	ab	ab	ab	ab	ab	ab	ab	ab	ab	ab	ab	ab	ab	ab	ab	aa	aa	aa	ab	ab	ab	ab	ab	ab	ab	ab	aa	ab	ab	ab	ab	ab	ab	ab	ab	ab	ab	ab	ab	ab	ab	ab	ab	ab	ab	ab
73	1	2	aa	aa	ab	ab	ab	ab	ab	ab	ab	ab	ab	ab	ab	ab	ab	aa	ab	aa	aa	ab	ab	ab	ab	ab	ab	ab	ab	ab	ab	ab	ab	ab	ab	ab	ab	ab	ab	ab	ab	ab	ab	ab	ab	ab	ab	ab	ab
74	1	2	ab	ab	uu	ab	ab	ab	ab	ab	ab	ab	uu	ab	ab	ab	ab	aa	ab	ab	ab	ab	uu	ab	ab	ab	ab	ab	ab	ab	ab	ab	ab	ab	uu	uu	ab	ab	ab	ab	ab	ab	ab	ab	ab	ab	ab	ab	ab
75	1	2	ab	ab	ab	aa	aa	bb	bb	bb	ab	ab	ab	ab	ab	ab	ab	ab	aa	aa	aa	ab	ab	ab	aa	ab	ab	aa	aa	aa	ab	ab	ab	ab	ab	ab	ab	ab	ab	ab	ab	ab	ab	ab	ab	ab	ab	ab	ab
76	1	2	ab	ab	ab	ab	ab	ab	ab	ab	ab	ab	ab	ab	ab	ab	ab	ab	aa	aa	aa	aa	aa	ab	ab	ab	ab	ab	ab	ab	ab	ab	ab	ab	ab	ab	ab	ab	ab	ab	ab	ab	ab	ab	ab	ab	uu	ab	ab
77	1	2	ab	ab	ab	ab	ab	ab	ab	ab	ab	ab	aa	aa	uu	bb	aa	aa	aa	aa	aa	ab	uu	ab	aa	ab	ab	aa	aa	aa	ab	ab	ab	ab	ab	ab	ab	ab	ab	ab	ab	ab	ab	ab	ab	ab	ab	ab	ab
78	1	2	aa	aa	aa	bb	bb	aa	aa	aa	bb	aa	bb	bb	aa	aa	ab	ab	aa	aa	aa	ab	ab	ab	aa	ab	ab	aa	aa	aa	ab	ab	ab	ab	ab	ab	ab	ab	ab	ab	ab	ab	ab	ab	ab	ab	ab	ab	uu
79	1	2	ab	ab	ab	ab	ab	ab	ab	ab	ab	ab	ab	ab	uu	aa	bb	ab	aa	aa	aa	aa	aa	aa	ab	aa	bb	ab	ab	ab	aa	bb	bb	bb	aa	bb	bb	aa	bb	aa	bb	aa	aa	bb	bb	bb	bb	bb	bb
80	1	2	aa	aa	uu	bb	bb	aa	aa	aa	bb	ab	bb	bb	aa	aa	bb	ab	aa	aa	aa	uu	aa	aa	ab	aa	bb	ab	ab	ab	aa	bb	bb	bb	uu	bb	bb	uu	uu	aa	bb	aa	aa	bb	bb	bb	bb	bb	bb
81	1	2	aa	aa	aa	bb	bb	aa	aa	aa	bb	aa	aa	aa	bb	bb	aa	aa	ab	ab	ab	aa	aa	aa	ab	aa	bb	ab	ab	ab	aa	bb	bb	bb	aa	bb	bb	aa	bb	ab	ab	ab	ab	ab	ab	ab	ab	ab	ab
82	1	2	ab	ab	ab	ab	ab	ab	ab	ab	ab	uu	ab	ab	uu	ab	ab	aa	ab	ab	ab	ab	ab	ab	aa	ab	ab	aa	aa	aa	ab	ab	ab	ab	ab	ab	ab	ab	ab	ab	uu	ab	ab	ab	ab	ab	ab	ab	ab
83	1	2	ab	aa	ab	ab	ab	ab	ab	ab	ab	ab	ab	ab	ab	ab	ab	ab	aa	aa	aa	aa	aa	aa	ab	aa	bb	ab	ab	ab	aa	bb	bb	bb	aa	bb	bb	aa	bb	ab	ab	ab	ab	ab	ab	ab	ab	ab	ab
84	1	2	ab	ab	ab	ab	ab	ab	uu	ab	ab	ab	ab	ab	ab	ab	uu	aa	ab	ab	ab	bb	bb	ab	aa	bb	uu	aa	aa	aa	bb	aa	aa	aa	uu	aa	uu	uu	aa	ab	ab	ab	ab	ab	ab	uu	ab	ab	ab
85	1	2	ab	ab	ab	ab	ab	ab	ab	ab	ab	ab	ab	ab	ab	ab	ab	aa	ab	ab	ab	bb	bb	bb	aa	bb	aa	aa	aa	aa	ab	aa	aa	aa	uu	aa	aa	uu	aa	ab	ab	ab	ab	ab	ab	ab	ab	ab	ab
86	1	2	ab	ab	ab	ab	ab	ab	ab	ab	ab	ab	ab	ab	ab	ab	ab	ab	ab	ab	ab	ab	ab	ab	aa	ab	ab	aa	aa	aa	ab	ab	ab	ab	ab	ab	ab	ab	ab	ab	uu	ab	ab	ab	ab	ab	ab	ab	ab
87	1	2	aa	ab	ab	ab	ab	ab	ab	ab	ab	ab	ab	ab	ab	ab	ab	aa	ab	ab	ab	ab	ab	ab	ab	ab	ab	ab	ab	ab	ab	ab	ab	ab	ab	ab	ab	ab	ab	ab	ab	ab	ab	ab	ab	ab	ab	ab	ab
88	1	2	ab	ab	ab	ab	ab	ab	ab	ab	ab	ab	ab	ab	ab	ab	ab	ab	ab	ab	ab	uu	bb	uu	aa	uu	aa	aa	aa	aa	uu	uu	ab	uu	uu	aa	aa	uu	aa	bb	uu	ab	uu	aa	uu	uu	uu	ab	aa
89	1	2	uu	aa	uu	bb	bb	aa	aa	aa	bb	uu	bb	bb	uu	uu	ab	aa	ab	ab	ab	uu	bb	bb	aa	bb	aa	aa	aa	aa	uu	aa	aa	aa	uu	aa	aa	bb	uu	ab	uu	uu	ab	ab	ab	ab	ab	ab	bb
90	1	2	aa	aa	ab	ab	ab	ab	ab	ab	ab	ab	ab	ab	ab	ab	ab	aa	ab	ab	ab	ab	ab	ab	ab	ab	ab	ab	ab	ab	ab	ab	ab	ab	ab	ab	ab	ab	ab	ab	ab	ab	ab	ab	ab	ab	ab	ab	aa
91	1	2	aa	aa	aa	bb	bb	aa	aa	aa	bb	aa	bb	bb	aa	aa	bb	ab	aa	aa	aa	bb	bb	bb	aa	bb	aa	aa	aa	aa	bb	aa	aa	aa	bb	aa	aa	bb	aa	bb	aa	bb	bb	aa	aa	aa	aa	aa	aa
92	1	2	aa	aa	ab	ab	ab	ab	ab	ab	ab	ab	aa	aa	bb	bb	aa	aa	ab	ab	ab	ab	ab	ab	ab	ab	ab	ab	ab	ab	ab	ab	ab	ab	ab	ab	ab	ab	ab	ab	uu	ab	ab	ab	ab	ab	ab	ab	ab
93	1	2	aa	ab	ab	ab	ab	ab	ab	ab	ab	ab	ab	ab	ab	ab	ab	ab	aa	aa	aa	bb	bb	bb	aa	bb	aa	aa	aa	aa	bb	aa	aa	uu	bb	aa	aa	bb	aa	bb	aa	bb	bb	aa	ab	ab	uu	ab	ab
94	1	2	ab	ab	ab	ab	ab	bb	uu	bb	ab	ab	ab	uu	ab	ab	ab	ab	aa	aa	aa	aa	uu	aa	ab	aa	bb	ab	ab	ab	aa	bb	bb	bb	aa	bb	bb	uu	uu	aa	bb	uu	uu	bb	bb	uu	uu	uu	bb
95	1	2	ab	ab	ab	ab	ab	ab	ab	ab	ab	ab	ab	ab	ab	ab	ab	ab	aa	aa	aa	ab	ab	ab	ab	ab	ab	ab	ab	ab	ab	ab	ab	ab	ab	ab	ab	ab	ab	ab	ab	ab	ab	ab	ab	ab	ab	ab	ab
96	1	2	ab	ab	ab	ab	ab	ab	ab	ab	ab	ab	ab	ab	ab	ab	ab	aa	ab	ab	ab	aa	aa	aa	ab	aa	bb	ab	ab	ab	aa	bb	bb	bb	aa	bb	bb	aa	bb	aa	bb	aa	aa	bb	bb	bb	bb	bb	bb
97	1	2	uu	aa	aa	bb	bb	aa	aa	aa	bb	aa	bb	bb	aa	aa	bb	ab	aa	aa	aa	aa	aa	uu	ab	aa	uu	ab	ab	ab	aa	bb	bb	bb	aa	bb	bb	uu	bb	aa	bb	aa	aa	bb	bb	bb	bb	bb	uu
98	1	2	ab	ab	ab	ab	ab	bb	bb	bb	ab	ab	bb	bb	aa	aa	bb	ab	aa	aa	aa	bb	bb	bb	aa	bb	aa	aa	aa	aa	ab	ab	aa	aa	bb	aa	aa	ab	ab	aa	bb	aa	aa	bb	bb	bb	bb	bb	bb
99	1	2	ab	ab	ab	aa	aa	bb	bb	bb	aa	bb	aa	aa	bb	bb	uu	aa	ab	ab	aa	aa	aa	aa	ab	aa	bb	ab	ab	ab	uu	bb	bb	bb	aa	bb	bb	uu	bb	aa	bb	aa	aa	bb	bb	bb	bb	bb	bb
100	1	2	ab	ab	ab	ab	ab	ab	ab	ab	ab	uu	ab	ab	ab	ab	ab	aa	ab	ab	ab	ab	uu	ab	aa	ab	ab	aa	aa	aa	uu	ab	ab	ab	ab	ab	ab	ab	ab	ab	ab	ab	uu	ab	ab	ab	ab	ab	uu
101	1	2	ab	ab	ab	ab	ab	ab	ab	ab	ab	ab	ab	ab	ab	bb	uu	aa	ab	ab	ab	ab	ab	ab	ab	ab	ab	ab	ab	ab	ab	ab	ab	ab	ab	ab	ab	ab	ab	ab	ab	ab	ab	ab	ab	ab	ab	ab	ab
102	1	2	ab	ab	ab	ab	ab	ab	ab	ab	ab	ab	ab	ab	ab	ab	ab	aa	ab	ab	ab	ab	ab	ab	aa	ab	ab	aa	aa	aa	ab	ab	ab	ab	ab	ab	ab	ab	ab	ab	ab	ab	ab	ab	ab	ab	ab	ab	ab
103	1	2	ab	ab	ab	aa	uu	bb	bb	bb	ab	ab	ab	ab	ab	ab	ab	ab	aa	aa	aa	bb	bb	bb	aa	bb	aa	aa	aa	aa	bb	ab	ab	ab	ab	ab	ab	ab	ab	ab	ab	ab	ab	ab	ab	ab	ab	ab	ab
104	1	2	ab	ab	aa	bb	bb	aa	aa	aa	bb	aa	bb	bb	aa	aa	bb	ab	aa	aa	aa	bb	bb	bb	aa	bb	aa	aa	aa	aa	ab	aa	aa	aa	bb	aa	aa	bb	aa	bb	aa	bb	bb	aa	aa	aa	ab	ab	ab
105	1	2	ab	aa	ab	bb	uu	aa	ab	uu	ab	ab	ab	bb	ab	uu	uu	ab	aa	aa	aa	ab	ab	ab	aa	ab	aa	aa	ab	ab	ab	uu	ab	ab	ab	ab	uu	ab	aa	uu	ab	ab	uu	ab	ab	ab	ab	aa	uu
106	1	2	aa	ab	ab	aa	aa	uu	bb	bb	aa	uu	aa	uu	bb	bb	uu	aa	ab	ab	ab	uu	aa	aa	ab	aa	bb	ab	ab	ab	uu	uu	ab	ab	ab	aa	aa	bb	aa	bb	uu	bb	bb	uu	aa	aa	uu	aa	aa
107	1	2	ab	ab	ab	aa	aa	bb	bb	bb	aa	bb	ab	ab	ab	ab	ab	ab	aa	aa	aa	uu	aa	aa	ab	aa	bb	ab	ab	ab	uu	uu	bb	bb	uu	bb	bb	aa	uu	uu	bb	uu	aa	bb	bb	uu	bb	uu	bb
108	1	2	uu	aa	uu	bb	bb	ab	uu	uu	ab	uu	ab	bb	aa	aa	ab	ab	aa	aa	aa	ab	ab	ab	ab	ab	ab	ab	ab	ab	ab	ab	ab	uu	ab	ab	ab	ab	ab	ab	ab	ab	ab	ab	ab	ab	ab	ab	ab
109	1	2	ab	uu	ab	ab	ab	ab	ab	ab	ab	ab	aa	uu	uu	bb	aa	aa	ab	ab	ab	ab	aa	aa	ab	aa	bb	ab	ab	ab	aa	bb	bb	bb	aa	bb	bb	aa	bb	aa	bb	aa	aa	bb	bb	bb	bb	bb	bb
110	1	2	uu	ab	ab	ab	ab	ab	ab	ab	ab	ab	ab	ab	ab	ab	ab	aa	ab	ab	ab	bb	bb	bb	aa	bb	aa	aa	aa	aa	bb	aa	aa	aa	bb	aa	aa	bb	aa	bb	ab	ab	ab	ab	ab	ab	ab	ab	ab
111	1	2	ab	ab	ab	ab	ab	ab	ab	ab	ab	ab	ab	ab	ab	ab	ab	aa	ab	ab	ab	ab	ab	ab	ab	ab	ab	ab	ab	ab	ab	ab	ab	ab	ab	ab	ab	ab	ab	ab	ab	ab	ab	ab	ab	ab	ab	ab	ab
112	1	2	ab	ab	ab	ab	ab	ab	ab	ab	ab	ab	ab	ab	ab	ab	ab	ab	aa	aa	aa	ab	ab	ab	ab	ab	ab	ab	ab	ab	ab	ab	ab	ab	ab	ab	ab	ab	ab	ab	ab	ab	ab	ab	ab	ab	ab	ab	ab
113	1	2	ab	ab	ab	ab	ab	ab	ab	ab	ab	ab	ab	ab	ab	ab	ab	ab	aa	ab	ab	bb	bb	bb	aa	bb	aa	aa	aa	aa	ab	aa	aa	aa	bb	aa	aa	bb	aa	bb	aa	bb	bb	aa	aa	aa	aa	uu	ab
114	1	2	ab	ab	ab	ab	ab	ab	ab	ab	ab	ab	ab	ab	bb	bb	uu	aa	ab	ab	ab	ab	ab	ab	aa	ab	ab	aa	aa	aa	ab	ab	ab	ab	ab	ab	uu	ab	ab	ab	ab	ab	ab	ab	ab	ab	ab	ab	ab
115	1	2	ab	ab	ab	aa	uu	bb	bb	bb	aa	bb	aa	aa	bb	bb	aa	ab	aa	aa	aa	ab	ab	ab	aa	ab	ab	aa	aa	aa	ab	ab	ab	ab	ab	ab	ab	ab	ab	uu	ab	ab	ab	ab	uu	ab	ab	ab	ab
116	1	2	aa	aa	uu	bb	bb	aa	aa	aa	bb	uu	bb	bb	aa	aa	uu	ab	aa	aa	aa	ab	ab	uu	aa	ab	ab	aa	aa	aa	ab	ab	ab	ab	ab	ab	ab	ab	ab	ab	ab	ab	uu	ab	uu	ab	ab	ab	ab
117	1	2	ab	ab	ab	ab	ab	ab	ab	ab	ab	ab	ab	ab	ab	ab	ab	aa	ab	ab	ab	ab	ab	ab	ab	ab	ab	ab	ab	ab	ab	ab	ab	ab	ab	uu	ab	ab	ab	ab	ab	ab	uu	aa	aa	aa	aa	aa	aa
118	1	2	ab	ab	ab	ab	ab	ab	ab	ab	ab	ab	ab	ab	ab	ab	ab	ab	aa	aa	aa	ab	ab	ab	ab	ab	ab	ab	ab	ab	ab	ab	ab	ab	ab	ab	ab	ab	ab	ab	ab	ab	ab	ab	ab	ab	ab	ab	ab
119	1	2	ab	ab	ab	ab	ab	ab	ab	ab	ab	ab	ab	ab	ab	ab	ab	ab	aa	aa	aa	bb	bb	bb	aa	bb	aa	aa	aa	aa	bb	aa	aa	aa	bb	aa	aa	bb	aa	bb	aa	bb	bb	aa	aa	aa	aa	aa	aa
120	1	2	ab	ab	ab	ab	ab	ab	ab	ab	ab	ab	bb	bb	aa	aa	bb	ab	aa	aa	aa	ab	ab	ab	ab	ab	ab	ab	ab	ab	ab	ab	ab	ab	ab	ab	ab	ab	ab	ab	ab	ab	ab	ab	ab	ab	ab	ab	ab
121	1	2	ab	aa	ab	ab	ab	ab	ab	ab	ab	ab	ab	ab	uu	ab	ab	ab	aa	aa	aa	ab	ab	ab	aa	ab	ab	aa	aa	aa	ab	ab	ab	ab	ab	ab	ab	ab	ab	aa	bb	aa	uu	bb	bb	uu	bb	uu	bb
122	1	2	ab	ab	ab	ab	ab	ab	ab	ab	ab	ab	ab	ab	ab	ab	ab	ab	aa	aa	aa	ab	ab	ab	ab	ab	ab	ab	ab	ab	ab	ab	ab	ab	ab	ab	ab	ab	ab	aa	bb	aa	aa	bb	bb	bb	bb	bb	uu
123	1	2	aa	ab	ab	aa	aa	bb	bb	bb	aa	bb	ab	ab	ab	ab	ab	ab	aa	aa	aa	aa	aa	ab	ab	ab	ab	ab	ab	ab	ab	uu	ab	ab	ab	ab	ab	ab	ab	ab	bb	ab	ab	ab	ab	ab	ab	ab	ab
124	1	2	ab	ab	ab	ab	ab	ab	ab	ab	ab	ab	bb	bb	aa	aa	bb	ab	aa	aa	aa	ab	ab	ab	aa	ab	ab	aa	aa	aa	ab	ab	ab	ab	ab	ab	ab	ab	ab	ab	ab	ab	aa	bb	bb	bb	bb	bb	bb
125	1	2	ab	ab	ab	aa	uu	bb	bb	bb	aa	bb	aa	aa	bb	bb	aa	aa	ab	ab	ab	ab	ab	ab	aa	ab	ab	aa	aa	aa	ab	ab	ab	ab	ab	ab	ab	ab	ab	ab	ab	ab	ab	ab	ab	ab	ab	ab	ab
126	1	2	ab	uu	ab	ab	uu	uu	uu	uu	ab	ab	bb	bb	uu	aa	bb	ab	aa	aa	aa	bb	bb	bb	aa	bb	ab	aa	aa	aa	ab	ab	ab	ab	ab	ab	ab	ab	ab	ab	ab	ab	ab	ab	ab	ab	ab	ab	ab
127	1	2	uu	ab	ab	ab	ab	ab	ab	ab	ab	ab	ab	ab	ab	ab	ab	aa	ab	ab	ab	bb	bb	bb	aa	bb	aa	aa	aa	aa	bb	aa	aa	aa	bb	aa	aa	bb	aa	bb	uu	bb	bb	aa	aa	aa	aa	aa	aa
128	1	2	ab	ab	ab	aa	aa	bb	bb	bb	aa	bb	aa	aa	bb	bb	aa	aa	ab	ab	ab	bb	bb	ab	aa	ab	ab	aa	aa	aa	ab	ab	ab	ab	ab	ab	ab	ab	ab	ab	ab	ab	ab	ab	ab	ab	ab	ab	ab
129	1	2	aa	aa	aa	bb	bb	aa	uu	aa	bb	aa	bb	bb	aa	aa	bb	ab	aa	aa	aa	aa	aa	aa	ab	aa	bb	ab	ab	ab	aa	bb	bb	bb	aa	bb	bb	aa	bb	aa	bb	aa	aa	bb	bb	bb	bb	bb	bb
130	1	2	aa	aa	aa	bb	bb	aa	aa	aa	bb	aa	bb	bb	aa	aa	bb	ab	aa	aa	aa	ab	ab	ab	ab	ab	ab	ab	ab	ab	ab	ab	ab	ab	ab	ab	ab	ab	ab	ab	ab	ab	ab	ab	ab	ab	ab	ab	ab
131	1	2	ab	ab	ab	ab	ab	ab	ab	ab	ab	ab	aa	aa	bb	bb	aa	aa	ab	ab	ab	bb	bb	bb	aa	bb	aa	aa	aa	aa	bb	aa	aa	aa	bb	aa	aa	bb	aa	bb	aa	bb	bb	aa	ab	ab	ab	ab	ab
132	1	2	aa	aa	aa	bb	bb	aa	aa	aa	bb	aa	bb	bb	aa	aa	bb	ab	aa	aa	aa	ab	ab	ab	aa	ab	ab	aa	aa	aa	ab	ab	ab	ab	ab	ab	ab	ab	ab	ab	ab	ab	ab	ab	ab	ab	uu	ab	ab
133	1	2	ab	ab	ab	ab	ab	ab	ab	ab	ab	ab	bb	bb	aa	aa	bb	ab	aa	aa	aa	ab	ab	ab	aa	ab	ab	aa	aa	aa	ab	ab	ab	ab	ab	ab	ab	ab	ab	ab	ab	ab	ab	ab	ab	ab	ab	ab	ab
134	1	2	ab	uu	ab	ab	ab	ab	ab	ab	ab	ab	ab	ab	ab	ab	ab	ab	aa	aa	aa	uu	aa	aa	ab	uu	bb	ab	ab	ab	aa	bb	bb	bb	uu	bb	bb	aa	uu	aa	uu	aa	aa	uu	ab	bb	bb	bb	bb
135	1	2	ab	ab	ab	aa	aa	bb	bb	bb	aa	bb	aa	aa	bb	bb	aa	aa	ab	ab	ab	ab	ab	ab	ab	ab	ab	ab	ab	ab	ab	ab	ab	ab	ab	ab	ab	ab	ab	ab	ab	ab	ab	ab	bb	bb	bb	uu	bb
136	1	2	ab	ab	ab	aa	aa	bb	uu	bb	aa	bb	aa	aa	bb	bb	aa	aa	ab	ab	ab	ab	ab	ab	ab	ab	ab	ab	ab	ab	ab	ab	ab	ab	ab	ab	ab	ab	ab	ab	ab	ab	ab	ab	ab	ab	ab	ab	ab
137	1	2	ab	ab	ab	uu	uu	bb	bb	bb	aa	bb	ab	aa	bb	uu	uu	aa	aa	aa	aa	aa	uu	aa	ab	aa	bb	ab	ab	ab	aa	ab	bb	bb	aa	uu	bb	aa	bb	aa	bb	aa	aa	bb	bb	uu	bb	bb	bb
138	1	2	aa	ab	ab	ab	ab	ab	ab	ab	ab	ab	ab	ab	ab	ab	ab	ab	aa	aa	aa	uu	aa	aa	ab	aa	bb	ab	ab	ab	uu	bb	bb	bb	aa	bb	bb	aa	uu	aa	bb	uu	uu	bb	uu	bb	bb	bb	bb
139	1	2	ab	ab	ab	ab	uu	uu	bb	uu	ab	uu	aa	uu	ab	ab	uu	aa	ab	ab	ab	bb	bb	ab	aa	ab	aa	aa	aa	aa	bb	uu	uu	uu	uu	uu	aa	uu	uu	bb	uu	uu	bb	uu	aa	uu	ab	ab	ab
140	1	2	ab	ab	ab	uu	aa	bb	bb	bb	aa	bb	aa	aa	bb	bb	aa	aa	ab	ab	ab	ab	ab	ab	ab	ab	ab	ab	ab	ab	ab	ab	ab	ab	ab	ab	uu	ab	ab	ab	ab	ab	ab	ab	ab	ab	ab	ab	ab
141	1	2	aa	ab	ab	aa	aa	ab	ab	bb	aa	bb	aa	aa	bb	bb	aa	aa	ab	ab	ab	bb	bb	bb	aa	bb	aa	aa	aa	aa	bb	ab	ab	ab	ab	ab	ab	ab	ab	ab	ab	ab	ab	ab	ab	ab	ab	ab	ab
142	1	2	ab	uu	ab	ab	uu	uu	ab	ab	ab	ab	ab	ab	ab	ab	ab	ab	aa	aa	aa	uu	bb	bb	aa	bb	aa	aa	aa	aa	uu	aa	aa	aa	bb	uu	aa	bb	uu	bb	aa	bb	uu	aa	aa	aa	aa	uu	aa
143	1	2	ab	ab	aa	uu	bb	uu	aa	uu	bb	aa	bb	ab	aa	aa	ab	ab	aa	aa	aa	ab	ab	ab	ab	ab	ab	ab	ab	ab	ab	ab	ab	ab	ab	ab	ab	ab	ab	ab	ab	ab	ab	ab	ab	ab	ab	ab	ab
144	1	2	uu	aa	uu	bb	bb	uu	aa	aa	uu	uu	bb	bb	uu	aa	bb	ab	aa	aa	aa	bb	bb	bb	aa	bb	aa	aa	aa	aa	ab	ab	ab	ab	ab	ab	ab	ab	uu	ab	ab	ab	ab	ab	ab	uu	uu	ab	ab
[truncated: 417 more columns]

## Sheet: info3123
marker	locus-Chr_v1
m1.1	chr01-75496894
m2.1	chr01-62442921
m8.1	chr01-31799445
m12.1	chr01-47555219
m13.1	chr01-47944106
m19.1	chr01-55805514
m21.1	chr01-56204900
m22.1	chr01-54936113
m28.1	chr01-41414183
m30.1	chr01-41418232
m31.1	chr01-27923482
m36.1	chr01-27858352
m38.1	chr01-28966832
m39.1	chr01-27212415
m40.1	chr01-26789291
m42.1	chr01-22275474
m48.1	chr01-7943926
m49.1	chr01-7279135
m51.1	chr01-52425370
m302.2	chr02-2361864
m303.2	chr02-2334862
m307.2	chr02-4640875
m308.2	chr02-2561774
m309.2	chr02-5111308
m311.2	chr02-5183776
m312.2	chr02-8245143
m313.2	chr02-3546215
m314.2	chr02-8536868
m317.2	chr02-8820696
m319.2	chr02-14313808
m321.2	chr02-10982560
m322.2	chr02-10928353
m323.2	chr02-10686199
m324.2	chr02-13369597
m325.2	chr02-12613700
m327.2	chr02-13878063
m328.2	chr02-13834902
m329.2	chr02-15106367
m330.2	chr02-16910773
m331.2	chr02-16791022
m334.2	chr02-19871843
m336.2	chr02-18120540
m337.2	chr02-19970844
m338.2	chr02-20918314
m340.2	chr02-22243898
m341.2	chr02-22803379
m342.2	chr02-26078078
m343.2	chr02-24902978
m344.2	chr02-25224066
m346.2	chr02-26196096
m348.2	chr02-25069939
m350.2	chr02-25119508
m352.2	chr02-24010796
m353.2	chr02-26677561
m354.2	chr02-28437245
m355.2	chr02-30198153
m356.2	chr02-29046244
m358.2	chr02-30219783
m361.2	chr02-32019555
m362.2	chr02-31901888
m363.2	chr02-33030031
m364.2	chr02-32299342
m365.2	chr02-32133730
m366.2	chr02-33057034
m369.2	chr02-34296546
m370.2	chr02-35743387
m371.2	chr02-35714476
m373.2	chr02-34274923
m374.2	chr02-34422333
m375.2	chr02-34715926
m376.2	chr02-36235288
m377.2	chr02-35837422
m379.2	chr02-36784594
m382.2	chr02-38999799
m384.2	chr02-40493812
m385.2	chr02-39099296
m386.2	chr02-39651701
m387.2	chr02-40285283
m389.2	chr02-43505031
m390.2	chr02-43034942
m392.2	chr02-44109179
m393.2	chr02-44187910
m394.2	chr02-44810456
m395.2	chr02-46298204
m397.2	chr02-45778562
m398.2	chr02-45725381
m399.2	chr02-48269594
m401.2	chr02-48187909
m402.2	chr02-46935131
m403.2	chr02-47619422
m404.2	chr02-52284670
m405.2	chr02-49714881
m406.2	chr02-47275533
m408.2	chr02-52154369
m409.2	chr02-53158327
m412.2	chr02-52988711
m414.2	chr02-55372540
m415.2	chr02-55604501
m416.2	chr02-55973264
m417.2	chr02-56568663
m419.2	chr02-55577623
m420.2	chr02-58334569
m421.2	chr02-60991851
m422.2	chr02-58007811
m423.2	chr02-59299607
m426.2	chr02-58014865
m226.3	chr03-1750079
m227.3	chr03-5826501
m229.3	chr03-5888990
m230.3	chr03-9627109
m232.3	chr03-21892502
m233.3	chr03-21939633
m235.3	chr03-21225869
m238.3	chr03-24130040
m241.3	chr03-24475416
m243.3	chr03-25646165
m247.3	chr03-27813984
m248.3	chr03-24469774
m249.3	chr03-31338742
m255.3	chr03-31137792
m256.3	chr03-29930110
m257.3	chr03-31366130
m260.3	chr03-34515954
m261.3	chr03-35863576
m263.3	chr03-38461611
m264.3	chr03-38745915
m266.3	chr03-53296304
m267.3	chr03-53145402
m269.3	chr03-53121753
m270.3	chr03-52932473
m271.3	chr03-53080488
m273.3	chr03-53840183
m275.3	chr03-54078642
m277.3	chr03-54070794
m279.3	chr03-54804499
m280.3	chr03-55153357
m281.3	chr03-57504715
m282.3	chr03-57255350
m283.3	chr03-55850880
m287.3	chr03-55865468
m288.3	chr03-56929694
m289.3	chr03-55688777
m290.3	chr03-58344921
m292.3	chr03-60179252
m293.3	chr03-59044431
m294.3	chr03-58480343
m296.3	chr03-59234513
m297.3	chr03-60696958
m298.3	chr03-60866242
m300.3	chr03-62275917
m301.3	chr03-61960594
m148.4	chr04-60923590
m150.4	chr04-58689415
m151.4	chr04-60884238
m153.4	chr04-55051495
m154.4	chr04-58439044
m155.4	chr04-49128210
m156.4	chr04-62124776
m157.4	chr04-58806206
m159.4	chr04-41923181
m160.4	chr04-51021246
m162.4	chr04-45961127
m167.4	chr04-46650758
m168.4	chr04-49966423
m171.4	chr04-46528479
m172.4	chr04-43725146
m173.4	chr04-44761334
m174.4	chr04-52574355
m175.4	chr04-41809632
m177.4	chr04-37164223
m178.4	chr04-42573589
m180.4	chr04-19674760
m183.4	chr04-29017188
m184.4	chr04-26654318
m185.4	chr04-26661572
m186.4	chr04-25242393
m187.4	chr04-24641158
m188.4	chr04-22412520
m427.5	chr05-59546742
m428.5	chr05-59836717
m429.5	chr05-58320194
m430.5	chr05-57475339
m434.5	chr05-53037136
m435.5	chr05-52966038
m436.5	chr05-52097419
m437.5	chr05-51085631
m438.5	chr05-50782744
m439.5	chr05-50034406
m442.5	chr05-47441830
m443.5	chr05-42163949
m444.5	chr05-43000669
m445.5	chr05-39762704
m446.5	chr05-39964832
m447.5	chr05-41705024
m448.5	chr05-39054516
m449.5	chr05-35833008
m450.5	chr05-38522552
m451.5	chr05-37118582
m452.5	chr05-37520753
m453.5	chr05-36423554
m456.5	chr05-35349136
m457.5	chr05-36244155
m458.5	chr05-34264672
m459.5	chr05-32964141
m460.5	chr05-33384638
m461.5	chr05-33298442
m462.5	chr05-29903442
m463.5	chr05-31595235
m464.5	chr05-31155752
m466.5	chr05-30924628
m467.5	chr05-29597205
m469.5	chr05-28942028
m470.5	chr05-28962306
m471.5	chr05-28970775
m472.5	chr05-27811527
m475.5	chr05-28915498
m477.5	chr05-26758589
m478.5	chr05-26744538
m482.5	chr05-27435331
m483.5	chr05-27276190
m485.5	chr05-27302567
m490.5	chr05-23479586
m491.5	chr05-23215348
m492.5	chr05-24235674
m493.5	chr05-22434182
m494.5	chr05-21475038
m495.5	chr05-21496239
m497.5	chr05-19308660
m498.5	chr05-2110664
m499.5	chr05-1773082
m501.5	chr05-2627268
m502.5	chr05-3756503
m504.5	chr05-3142154
m505.5	chr05-1054598
m506.5	chr05-2658162
m618.6	chr06-53331523
m620.6	chr06-53348611
m622.6	chr06-54847224
m623.6	chr06-54618249
m624.6	chr06-54019485
m625.6	chr06-50163475
m627.6	chr06-50382240
m628.6	chr06-49775524
m629.6	chr06-51160041
m631.6	chr06-46946742
m632.6	chr06-46822944
m634.6	chr06-43476812
m637.6	chr06-44357768
m638.6	chr06-44106309
m639.6	chr06-43749451
m640.6	chr06-43068327
m641.6	chr06-41444372
m645.6	chr06-41036029
m647.6	chr06-39465059
m651.6	chr06-38716585
m652.6	chr06-37446635
m654.6	chr06-37448350
m655.6	chr06-37541079
m656.6	chr06-36475583
m657.6	chr06-39058368
m658.6	chr06-36549219
m659.6	chr06-35470966
m661.6	chr06-32788659
m662.6	chr06-34157133
m663.6	chr06-34365392
m664.6	chr06-32914707
m665.6	chr06-29247608
m666.6	chr06-30604633
m667.6	chr06-28148526
m668.6	chr06-28167017
m669.6	chr06-28209518
m670.6	chr06-26470056
m671.6	chr06-26624283
m672.6	chr06-26889733
m673.6	chr06-27173890
m675.6	chr06-23491829
m676.6	chr06-25309397
m677.6	chr06-23827641
m678.6	chr06-24289923
m679.6	chr06-24244907
m681.6	chr06-23447592
m683.6	chr06-23399804
m685.6	chr06-17922304
m686.6	chr06-20586096
m687.6	chr06-20413067
m688.6	chr06-18770602
m690.6	chr06-21263150
m692.6	chr06-21761670
m694.6	chr06-13244274
m695.6	chr06-4771181
m696.6	chr06-15401273
m697.6	chr06-8070239
m698.6	chr06-17016613
m699.6	chr06-16088710
m700.6	chr06-14633922
m701.6	chr06-14592065
m704.6	chr06-2602780
m705.6	chr06-6942096
m706.6	chr06-6384915
m708.6	chr06-951485
m709.6	chr06-1876675
m710.6	chr06-1418419
m711.6	chr06-5295155
m3.7	chr07-51276464
m5.7	chr07-45197370
m8.7	chr07-41620064
m9.7	chr07-39929688
m10.7	chr07-44167397
m11.7	chr07-44397934
m13.7	chr07-40053181
m14.7	chr07-40424507
m15.7	chr07-42139702
m18.7	chr07-38910425
m22.7	chr07-37482029
m23.7	chr07-37079635
m24.7	chr07-35578006
m26.7	chr07-24570557
m27.7	chr07-19458140
m28.7	chr07-26368116
m29.7	chr07-33958708
m30.7	chr07-30231379
m32.7	chr07-17385244
m33.7	chr07-17418149
m34.7	chr07-17443969
m36.7	chr07-10780111
m43.7	chr07-13102118
m45.7	chr07-5956101
m46.7	chr07-9802190
m47.7	chr07-7455146
m48.7	chr07-5503442
m50.7	chr07-2945412
m51.7	chr07-3014827
m53.7	chr07-2716150
m56.7	chr07-985075
m57.7	chr07-1041077
m58.7	chr07-2680309
m59.7	chr07-5767035
m156.8	chr08-8147273
m157.8	chr08-10372653
m158.8	chr08-3428606
m159.8	chr08-3169775
m162.8	chr08-2202545
m163.8	chr08-7658722
m164.8	chr08-4538284
m165.8	chr08-4587655
m166.8	chr08-1921588
m167.8	chr08-10950563
m168.8	chr08-14675913
m170.8	chr08-10755297
m172.8	chr08-10759770
m175.8	chr08-12804125
m176.8	chr08-12779231
m177.8	chr08-12274293
m178.8	chr08-11336426
m183.8	chr08-14033554
m184.8	chr08-17456910
m185.8	chr08-17873383
m188.8	chr08-20669803
m189.8	chr08-25147465
m190.8	chr08-25967386
m194.8	chr08-28789462
m195.8	chr08-29547178
m196.8	chr08-31675011
m197.8	chr08-33096534
m199.8	chr08-28547928
m201.8	chr08-27933529
m210.8	chr08-41776176
m212.8	chr08-41078111
m213.8	chr08-36770474
m215.8	chr08-47638303
m216.8	chr08-46360488
m217.8	chr08-49035391
m223.8	chr08-51958246
m225.8	chr08-52080850
m53.9	chr09-3160289
m54.9	chr09-5877544
m55.9	chr09-6145959
m56.9	chr09-5426943
m57.9	chr09-6007413
m58.9	chr09-3262183
m59.9	chr09-6591101
m60.9	chr09-9917577
m61.9	chr09-16106114
m62.9	chr09-14271703
m63.9	chr09-12604336
m65.9	chr09-12298467
m66.9	chr09-14452108
m68.9	chr09-14365321
m69.9	chr09-13495685
m70.9	chr09-15135318
m72.9	chr09-16124755
m79.9	chr09-17134124
m80.9	chr09-18089133
m81.9	chr09-18404141
m82.9	chr09-18349552
m84.9	chr09-21031096
m87.9	chr09-26801665
m88.9	chr09-31916470
m89.9	chr09-28519745
m91.9	chr09-28394120
m94.9	chr09-29156829
m96.9	chr09-30566643
m97.9	chr09-32304647
m100.9	chr09-33013657
m102.9	chr09-33345299
m103.9	chr09-32900288
m104.9	chr09-35090483
m105.9	chr09-34941005
m106.9	chr09-35095938
m107.9	chr09-33899406
m108.9	chr09-34916169
m109.9	chr09-33797423
m110.9	chr09-36409722
m112.9	chr09-34429417
m113.9	chr09-37174944
m118.9	chr09-36979632
m119.9	chr09-36802163
m125.9	chr09-43131640
m126.9	chr09-42904455
m129.9	chr09-41469259
m131.9	chr09-43677929
m134.9	chr09-47429548
m135.9	chr09-48838599
m136.9	chr09-48586560
m137.9	chr09-48292796
m138.9	chr09-51619770
m139.9	chr09-53208611
m140.9	chr09-52299793
m141.9	chr09-54462902
m143.9	chr09-52679578
m543.10	chr10-36770061
m545.10	chr10-36804359
m546.10	chr10-36710353
m547.10	chr10-36196192
m548.10	chr10-36134494
m549.10	chr10-35329002
m550.10	chr10-34658668
m556.10	chr10-31565610
m557.10	chr10-32472150
m563.10	chr10-30587172
m564.10	chr10-28512055
m566.10	chr10-28858877
m567.10	chr10-25541751
m569.10	chr10-24142247
m572.10	chr10-21099418
m574.10	chr10-20325372
m576.10	chr10-17774586
m580.10	chr10-19296050
m582.10	chr10-15472883
m584.10	chr10-17849738
m589.10	chr10-14482113
m590.10	chr10-16506825
m591.10	chr10-13428206
m592.10	chr10-13412233
m593.10	chr10-13452022
m594.10	chr10-12368822
m595.10	chr10-7939589
m596.10	chr10-7215534
m597.10	chr10-7413297
m602.10	chr10-7218831
m608.10	chr10-6137369
m612.10	chr10-4543142
m613.10	chr10-5003792
m614.10	chr10-3810494

## Sheet: map4092
m163	0.256	1
m157	7.402	1
m166	12.664	1
m156	15.687	1
m153	15.797	1
m152	18.032	1
m155	18.349	1
m145	18.965	1
m146	18.991	1
m147	19.081	1
m143	19.366	1
m141	29.167	1
m140	29.603	1
m134	33.489	1
m136	33.763	1
m130	38.687	1
m127	38.704	1
m126	40.186	1
m125	42.47	1
m122	42.869	1
m123	43.205	1
m115	47.681	1
m171	48.263	1
m117	51.187	1
m138	51.939	1
m112	53.166	1
m419	0.366	2
m420	2.246	2
m421	4.915	2
m432	9.008	2
m422	9.115	2
m429	9.448	2
m423	9.838	2
m428	9.935	2
m425	10.096	2
m434	12.141	2
m436	12.191	2
m431	12.344	2
m435	12.347	2
m433	12.42	2
m430	12.625	2
m440	14.018	2
m437	14.4	2
m443	14.584	2
m438	14.74	2
m445	14.78	2
m449	14.931	2
m441	15.294	2
m451	15.652	2
m446	15.686	2
m450	15.99	2
m444	16.912	2
m458	17.207	2
m460	17.399	2
m454	17.459	2
m455	17.914	2
m457	18.011	2
m459	18.562	2
m464	19.704	2
m472	20.418	2
m466	20.551	2
m474	20.831	2
m471	21.418	2
m469	21.565	2
m467	21.968	2
m477	23.054	2
m468	23.61	2
m465	24.591	2
m476	26.544	2
m478	35.524	2
m483	39.056	2
m482	41.099	2
m480	42.252	2
m481	42.285	2
m486	42.675	2
m493	45.241	2
m495	46.339	2
m494	46.923	2
m491	47.482	2
m487	47.618	2
m492	47.829	2
m497	48.301	2
m498	48.405	2
m500	48.994	2
m499	50.325	2
m501	50.594	2
m504	51.8	2
m502	52.088	2
m505	52.294	2
m503	52.302	2
m507	54.001	2
m511	54.064	2
m506	54.765	2
m524	54.937	2
m513	54.96	2
m514	54.992	2
m520	55.013	2
m525	55.032	2
m521	56.069	2
m526	56.192	2
m531	57.388	2
m533	57.596	2
m529	57.612	2
m535	57.793	2
m528	58.013	2
m539	58.766	2
m537	61.116	2
m536	61.471	2
m540	62.537	2
m541	64.587	2
m545	64.756	2
m543	64.864	2
m544	65.189	2
m548	65.48	2
m549	66.934	2
m364	0.695	3
m363	0.709	3
m362	1.278	3
m366	4.894	3
m367	6.441	3
m368	6.542	3
m369	15.04	3
m370	15.09	3
m371	21.435	3
m372	22.721	3
m376	28.352	3
m377	33.251	3
m375	34.572	3
m374	34.618	3
m378	46.406	3
m383	48.828	3
m381	49.452	3
m387	52.276	3
m388	52.705	3
m390	53.486	3
m392	54.202	3
m391	54.41	3
m389	54.688	3
m398	54.936	3
m399	55.916	3
m396	56.849	3
m393	58.025	3
m394	58.118	3
m401	58.517	3
m400	58.605	3
m407	59.323	3
m404	59.52	3
m405	59.784	3
m408	60.559	3
m411	61.18	3
m414	63.015	3
m413	63.143	3
m416	64.943	3
m417	68.595	3
m658	50.692	4
m656	50.757	4
m659	50.852	4
m650	55.597	4
m661	55.678	4
m649	57.399	4
m646	60.295	4
m643	63.553	4
m645	63.811	4
m641	72.813	4
m642	75.957	4
m640	82.446	4
m639	84.443	4
m638	103.954	4
m635	132.743	4
m631	133.529	4
m633	133.971	4
m630	136.417	4
m624	136.878	4
m629	137.158	4
m621	137.796	4
m625	138.461	4
m614	1.36	5
m612	2.457	5
m609	2.82	5
m620	5.738	5
m608	10.009	5
m607	11.571	5
m605	15.645	5
m602	17.288	5
m601	21.744	5
m599	25.55	5
m600	26.517	5
m598	29.085	5
m594	30.183	5
m596	31.903	5
m595	32.016	5
m593	32.39	5
m592	32.759	5
m597	34.197	5
m591	36.166	5
m587	38.154	5
m588	39.078	5
m590	39.218	5
m589	39.417	5
m586	40.454	5
m585	41.483	5
m580	41.981	5
m582	44.839	5
m584	44.964	5
m581	46.027	5
m579	46.474	5
m569	48.092	5
m573	48.404	5
m570	48.582	5
m574	50.185	5
m576	52.447	5
m568	54.828	5
m565	55.53	5
m566	55.978	5
m564	56.574	5
m563	57.415	5
m559	57.594	5
m558	58.364	5
m557	59.153	5
m556	63.231	5
m553	63.452	5
m552	63.539	5
m550	64.473	5
m551	65.227	5
m783	3.962	6
m785	3.985	6
m782	4.499	6
m784	4.631	6
m779	5.329	6
m781	6.371	6
m775	8.907	6
m769	8.922	6
m773	14.147	6
m763	14.642	6
m768	15.778	6
m762	15.916	6
m761	15.986	6
m758	15.998	6
m760	16.023	6
m755	16.663	6
m756	16.761	6
m754	17.477	6
m753	17.707	6
m752	17.709	6
m751	18.249	6
m745	18.75	6
m748	18.812	6
m746	18.866	6
m749	19.197	6
m747	19.923	6
m744	20.669	6
m743	23.751	6
m742	25.027	6
m741	25.921	6
m740	28.187	6
m737	29.045	6
m738	29.178	6
m736	29.758	6
m729	30.206	6
m735	30.569	6
m730	30.971	6
m728	31.052	6
m724	31.139	6
m726	31.629	6
m734	32.144	6
m731	32.993	6
m732	33.659	6
m723	33.766	6
m721	34.12	6
m722	34.559	6
m718	35.579	6
m719	36.269	6
m717	36.387	6
m716	36.76	6
m712	41.409	6
m710	41.502	6
m711	41.898	6
m715	45.258	6
m714	51.085	6
m713	52.4	6
m709	54.18	6
m702	59.278	6
m703	59.624	6
m700	59.942	6
m704	60.38	6
m708	61.455	6
m100	0.658	7
m108	2.598	7
m107	2.963	7
m105	3.239	7
m106	3.627	7
m110	4.071	7
m109	5.71	7
m104	6.084	7
m102	8.084	7
m99	10.836	7
m103	11.391	7
m94	11.917	7
m93	11.919	7
m90	17.589	7
m89	17.732	7
m87	18.095	7
m88	18.321	7
m84	19.084	7
m83	19.219	7
m81	19.256	7
m86	19.284	7
m77	19.652	7
m80	19.672	7
m76	20.37	7
m68	20.959	7
m72	21.125	7
m67	21.213	7
m73	21.336	7
m74	21.425	7
m69	21.758	7
m64	21.904	7
m63	21.929	7
m71	22.321	7
m62	25.708	7
m59	26.402	7
m58	28.219	7
m55	28.223	7
m53	29.425	7
m45	29.481	7
m44	29.487	7
m49	29.631	7
m47	30.091	7
m48	30.714	7
m54	32.628	7
m42	36.407	7
m43	36.657	7
m41	37.436	7
m39	37.552	7
m40	37.683	7
m36	37.834	7
m33	38.178	7
m35	38.615	7
m31	40.482	7
m30	40.746	7
m27	40.827	7
m26	41.436	7
m23	41.679	7
m25	41.762	7
m20	42.521	7
m17	44.689	7
m18	44.706	7
m16	45.823	7
m14	46.059	7
m10	47.59	7
m9	49.586	7
m13	50.428	7
m15	50.943	7
m7	55.149	7
m5	55.826	7
m6	56.273	7
m4	56.686	7
m8	56.978	7
m3	59.371	7
m1	60.282	7
m287	1.397	8
m289	1.52	8
m291	2.753	8
m296	3.094	8
m321	3.15	8
m293	3.166	8
m304	4.461	8
m318	4.607	8
m309	5.141	8
m302	5.272	8
m300	5.393	8
m299	7.712	8
m311	7.875	8
m310	7.938	8
m317	7.983	8
m295	8.04	8
m294	8.092	8
m324	8.113	8
m323	8.644	8
m298	8.999	8
m301	9.017	8
m316	9.93	8
m319	10.002	8
m325	10.669	8
m327	10.888	8
m326	11.08	8
m328	12.193	8
m330	12.293	8
m329	12.617	8
m333	12.682	8
m331	12.99	8
m335	13.447	8
m336	14.189	8
m337	14.587	8
m338	15.262	8
m341	15.717	8
m343	17.215	8
m353	22.799	8
m349	24.474	8
m358	24.491	8
m356	25.536	8
m351	26.116	8
m352	28.542	8
m354	28.753	8
m361	34.532	8
m359	34.684	8
m283	0.305	9
m275	1.117	9
m271	2.62	9
m285	2.68	9
m276	2.691	9
m280	4.386	9
m282	4.812	9
m272	5.353	9
m278	6.016	9
m277	7.351	9
m284	7.544	9
m270	8.562	9
m269	8.926	9
m264	9.719	9
m258	10.404	9
m263	10.594	9
m261	10.667	9
m260	10.817	9
m265	10.822	9
m257	11.296	9
m255	11.512	9
m256	11.621	9
m254	11.895	9
m253	13.056	9
m247	13.343	9
m252	14.208	9
m251	14.453	9
m249	14.71	9
m242	15.683	9
m241	16.28	9
m244	17.139	9
m243	19.216	9
m235	19.448	9
m236	19.932	9
m226	22.443	9
m229	22.5	9
m231	22.568	9
m234	22.616	9
m227	22.854	9
m230	22.964	9
m232	23.599	9
m217	23.934	9
m219	27.15	9
m215	27.413	9
m213	28.605	9
m214	29.104	9
m211	29.77	9
m212	30.07	9
m208	32.379	9
m204	33.42	9
m201	35.514	9
m196	35.899	9
m198	36.848	9
m194	36.968	9
m197	37.813	9
m193	38.588	9
m195	38.648	9
m188	39.362	9
m190	43.664	9
m192	44.307	9
m191	44.681	9
m185	45.989	9
m186	46.235	9
m184	50.471	9
m183	53.61	9
m182	69.784	9
m181	72.236	9
m180	74.908	9
m178	86.125	9
m695	14.871	10
m694	14.883	10
m684	16.715	10
m692	19.65	10
m680	19.733	10
m690	21.116	10
m683	21.332	10
m691	21.865	10
m678	22.107	10
m676	22.47	10
m675	23.325	10
m674	23.402	10
m673	24.682	10
m672	25.46	10
m668	28.236	10
m670	29.503	10
m664	30.162	10
m665	31.407	10
m667	31.52	10
m663	31.89	10
m666	32.161	10

[truncated: 8 more sheets: primary4092, info4092, map4792, primary4792, info4792, map9240, primary9240, info9240]
